# Supplementary material for: Palladium-catalyzed synthesis of indene derivatives via propargylic carbonates with in situ generated organozinc compounds
Source: Royal Society of Chemistry journal article supplement (doi:10.1039/b719957k), 2008-01-01

*Supporting Information For*

**Palladium-Catalyzed Synthesis of Indene Derivatives via Propargylic  
Carbonates with in situ Organozinc Compounds**

Zheng-Hui Guan, Zhi-Hui Ren, Lian-Biao Zhao, and Yong-Min Liang\*

State Key Laboratory of Applied Organic Chemistry, Lanzhou University, Lanzhou 730000,  
P. R. China

(E-mail: [liangym@lzu.edu.cn](mailto:liangym@lzu.edu.cn))

**Context**

|                                                                                      |                |
|--------------------------------------------------------------------------------------|----------------|
| <b>1. General information</b>                                                        | <b>S2</b>      |
| <b>2. Typical procedure for preparation of 5 and in synthesis of 3i</b>              | <b>S2</b>      |
| <b>3. Typical procedure for indenenes synthesis via in situ organozinc compounds</b> | <b>S3</b>      |
| <b>4. Spectroscopic data for indene products 3</b>                                   | <b>S3–S10</b>  |
| <b>5. Copies of <sup>1</sup>H NMR and <sup>13</sup>C NMR spectra</b>                 | <b>S11–S52</b> |

### General information:

Column chromatography was carried out on silica gel.  $^1\text{H}$  NMR spectra were recorded on 300 MHz or 400 MHz in  $\text{CDCl}_3$  and  $^{13}\text{C}$  NMR spectra were recorded on 75 MHz or 100 MHz in  $\text{CDCl}_3$  using TMS as internal standard. IR spectra were recorded on a FT-IR spectrometer and only major peaks are reported in  $\text{cm}^{-1}$ . Melting points were determined on a microscopic apparatus and were uncorrected. All new compounds were further characterized by element analysis; copies of their  $^1\text{H}$  NMR and  $^{13}\text{C}$  NMR spectra are provided. Unless otherwise stated, all aryl halides were purchased from commercial suppliers and used without further purification. Propargylic carbonates were prepared according to the following literature:

(a) Duan, X.-H.; Guo, L.-N.; Bi, H.-P.; Liu, X.-Y.; Liang, Y.-M. *Org. Lett.* **2006**, *8*, 5777-5780.

(b) Guo, L.-N.; Duan, X.-H.; Bi, H.-P.; Liu, X.-Y.; Liang, Y.-M. *J. Org. Chem.* **2007**, *72*, 1538-1540.

### Typical procedure for preparation of **5** and in synthesis of **3i**

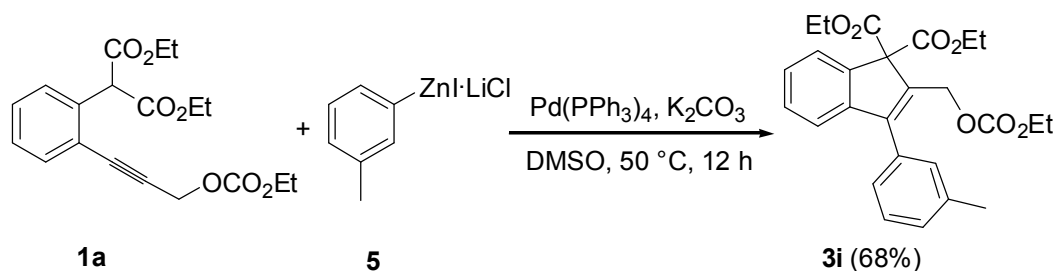

Anhydrous  $\text{LiCl}$  (7 mmol) was placed in an Ar-flushed flask and dried for 20 min at  $150 - 170\text{ }^\circ\text{C}$  under high vacuum (1 mbar). Zinc powder (7 mmol, 1.4 equiv, 325 mesh, Strem) was added under Ar and the heterogeneous mixture of Zn and  $\text{LiCl}$  was dried again for 10 - 20 min at  $150 - 170\text{ }^\circ\text{C}$  under high vacuum (1 mbar). The reaction flask was evacuated and refilled with argon three times. THF (5 mL) was added and the Zn was activated with  $\text{BrCH}_2\text{CH}_2\text{Br}$  (5 mol%) and  $\text{Me}_3\text{SiCl}$  (1 mol%). 1-iodo-3-methylbenzene (5 mmol) was then added neat at room temperature. The insertion reaction was complete after 48 h and afforded the solution of **5**.

The solution of **5** (0.3 mmol, 0.38 mL, titration with iodine) was carefully separated from the remaining zinc powder by using a syringe and transferred to the mixture of diethyl 2-(2-(3-(ethoxycarbonyloxy)prop-1-ynyl)phenyl)malonate **1a** (36.2 mg, 0.10 mmol),  $\text{Pd}(\text{PPh}_3)_4$  (2.3 mg, 0.002 mmol, 2 mol %),  $\text{K}_2\text{CO}_3$  (27.6 mg, 0.20 mmol) in DMSO (2.0 mL) under an argon atmosphere. The resulting mixture was stirred for 12 h at  $50\text{ }^\circ\text{C}$ . Then, the reaction mixture was allowed to cool to room temperature, quenched with water and extracted with  $\text{EtOAc}$  (2 mL\*3). The combined organic extracts were washed with water and saturated brine. The organic layer was dried over  $\text{Na}_2\text{SO}_4$  and filtered. Solvents were evaporated under reduced pressure. The residue was purified by chromatography on silica gel to afford corresponding indene product **3i** in 68% yield (hexanes/ $\text{EtOAc}$  15:1).

### Typical procedure for indenes synthesis via in situ organozinc compounds

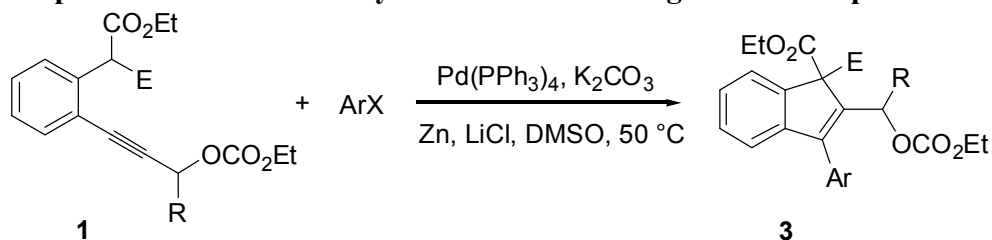

The solution of the propargylic carbonate **1** (0.10 mmol), aryl iodide (0.15 mmol), Zn powder (19.5 mg, 0.30 mmol), anhydrous LiCl (12.8 mg, 0.30 mmol),  $\text{Pd(PPh}_3)_4$  (2.3 mg, 0.002 mmol, 2 mol %),  $\text{K}_2\text{CO}_3$  (27.6 mg, 0.20 mmol) in DMSO (2.0 mL) was stirred under an argon atmosphere at  $50\text{ }^\circ\text{C}$ . When the reaction was considered complete as determined by TLC analysis, the reaction mixture was allowed to cool to room temperature, quenched with water and extracted with EtOAc (2 mL\*3). The combined organic extracts were washed with water and saturated brine. The organic layer was dried over  $\text{Na}_2\text{SO}_4$  and filtered. Solvents were evaporated under reduced pressure. The residue was purified by chromatography on silica gel to afford corresponding indene product **3**.

### Spectroscopic data for indene products **3**

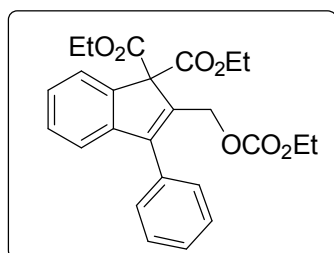

**3a**: mp:  $50\text{-}51\text{ }^\circ\text{C}$ .  $^1\text{H}$  NMR (300 MHz,  $\text{CDCl}_3$ )  $\delta$  7.75-7.72 (m, 1H), 7.48-7.42 (m, 5H), 7.35-7.32 (m, 2H), 7.25-7.21 (m, 1H), 5.15 (s, 2H), 4.31-4.12 (m, 6H), 1.30-1.24 (m, 9H).  $^{13}\text{C}$  NMR (75 MHz,  $\text{CDCl}_3$ )  $\delta$  167.7, 154.8, 149.5, 143.9, 140.5, 133.5, 132.6, 128.9, 128.6, 127.2, 125.3, 121.5, 70.2, 63.8, 62.7, 62.2, 14.2, 13.8. IR (KBr,  $\text{cm}^{-1}$ ) 2983, 1744, 1252, 1050. Anal. Calcd for  $\text{C}_{25}\text{H}_{26}\text{O}_7$ : C 68.48, H 5.98; Found: C 68.27, H 5.69.

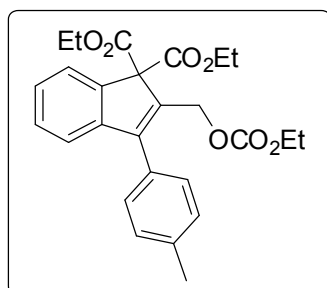

**3b**: mp:  $80\text{-}80.5\text{ }^\circ\text{C}$ .  $^1\text{H}$  NMR (300 MHz,  $\text{CDCl}_3$ )  $\delta$  7.74-7.71 (m, 1H), 7.36-7.22 (m, 7H), 5.14 (s, 2H), 4.30-4.12 (m, 6H), 2.42 (s, 3H), 1.30-1.25 (t,  $J = 6.9\text{ Hz}$ , 9H).  $^{13}\text{C}$  NMR (75 MHz,  $\text{CDCl}_3$ )  $\delta$  167.8, 154.8, 149.6, 144.0, 140.6, 138.4, 133.1, 129.6,

129.3, 128.8, 128.5, 127.2, 125.3, 121.5, 70.2, 63.8, 62.8, 62.2, 21.3, 14.2, 13.8. IR (KBr,  $\text{cm}^{-1}$ ) 2979, 1730, 1261, 1046. Anal.Calcd for  $\text{C}_{26}\text{H}_{28}\text{O}_7$ : C 69.01, H 6.24; Found: C 68.75, H 5.96.

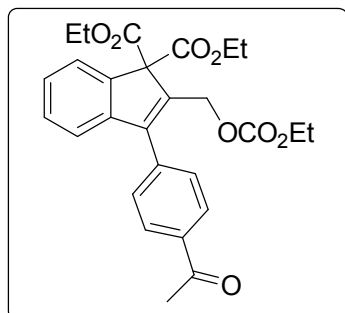

**3c**: mp: 90.5-91 °C.  $^1\text{H}$  NMR (300 MHz,  $\text{CDCl}_3$ )  $\delta$  8.09-8.06 (d,  $J = 8.1$  Hz, 2H), 7.75-7.72 (m, 1H), 7.55-7.57 (d,  $J = 8.1$  Hz, 2H), 7.36-7.33 (m, 2H), 7.18-7.15 (m, 1H), 5.11 (s, 2H), 4.31-4.18 (m, 4H), 4.18-4.11 (q,  $J = 6.9$  Hz, 2H), 2.66 (s, 3H), 1.30-1.24 (q,  $J = 6.9$  Hz, 9H).  $^{13}\text{C}$  NMR (75 MHz,  $\text{CDCl}_3$ )  $\delta$  197.6, 167.4, 154.7, 148.4, 143.4, 140.5, 137.6, 137.0, 134.6, 129.2, 128.7, 128.6, 127.6, 125.5, 121.3, 70.4, 63.9, 62.4, 62.3, 26.7, 14.2, 13.8. IR (KBr,  $\text{cm}^{-1}$ ) 3428, 2992, 1742, 1259. Anal.Calcd for  $\text{C}_{27}\text{H}_{28}\text{O}_8$ : C 67.49, H 5.87; Found: C 67.64, H 5.66.

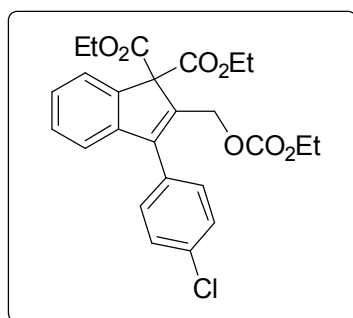

**3d**: mp: 77-78 °C.  $^1\text{H}$  NMR (300 MHz,  $\text{CDCl}_3$ )  $\delta$  7.74-7.71 (m, 1H), 7.48-7.45 (d,  $J = 8.4$  Hz, 2H), 7.41-7.38 (d,  $J = 8.4$  Hz, 2H), 7.36-7.33 (m, 2H), 7.18-7.16 (m, 1H), 5.11 (s, 2H), 4.31-4.12 (m, 6H), 1.32-1.25 (m, 9H).  $^{13}\text{C}$  NMR (75 MHz,  $\text{CDCl}_3$ )  $\delta$  167.5, 154.7, 148.4, 143.5, 140.4, 134.6, 134.0, 131.0, 130.3, 128.9, 128.7, 127.5, 125.4, 121.3, 70.3, 63.9, 62.5, 62.3, 14.3, 13.8. IR (KBr,  $\text{cm}^{-1}$ ) 2978, 1727, 1261, 1044. Anal.Calcd for  $\text{C}_{25}\text{H}_{25}\text{ClO}_7$ : C 63.49, H 5.33; Found: C 63.37, H 5.38.

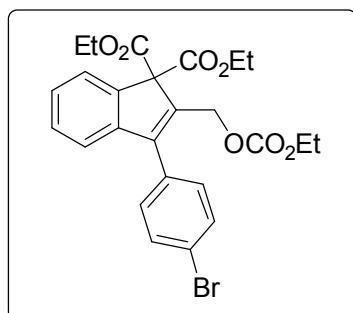

**3e**: mp: 87-88 °C.  $^1\text{H}$  NMR (300 MHz,  $\text{CDCl}_3$ )  $\delta$  7.75-7.72 (m, 1H), 7.64-7.61 (m, 2H), 7.37-7.32 (m, 4H), 7.19-7.16 (m, 1H), 5.11 (s, 2H), 4.31-4.12 (m, 6H), 1.30-1.25 (m, 9H).  $^{13}\text{C}$  NMR (75 MHz,  $\text{CDCl}_3$ )  $\delta$  167.5, 154.7, 148.3, 143.5, 140.4, 134.0, 131.8, 131.5, 130.6, 128.7, 127.5, 125.4, 122.8, 121.3, 70.3, 63.9, 62.5, 62.3, 14.2,

13.8. IR (KBr,  $\text{cm}^{-1}$ ) 2978, 1745, 1725, 1260. Anal.Calcd for  $\text{C}_{25}\text{H}_{25}\text{BrO}_7$ : C 58.04, H 4.87; Found: C 58.01, H 5.01.

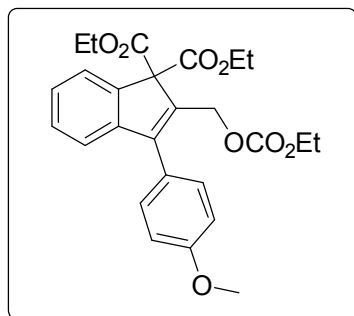

**3f**: mp: 94-95 °C.  $^1\text{H}$  NMR (300 MHz,  $\text{CDCl}_3$ )  $\delta$  7.74-7.71 (m, 1H), 7.42-7.39 (d,  $J = 8.7$  Hz, 2H), 7.35-7.32 (m, 2H), 7.27-7.24 (m, 1H), 7.03-7.00 (d,  $J = 8.7$  Hz, 2H), 5.14 (s, 2H), 4.31-4.13 (m, 6H), 3.86 (s, 3H), 1.30-1.25 (t,  $J = 6.9$  Hz, 9H).  $^{13}\text{C}$  NMR (75 MHz,  $\text{CDCl}_3$ )  $\delta$  167.8, 159.7, 154.8, 149.3, 144.0, 140.5, 132.7, 130.2, 128.5, 127.2, 125.3, 124.8, 121.5, 114.0, 70.1, 63.8, 62.9, 62.2, 55.3, 14.3, 13.8. IR (KBr,  $\text{cm}^{-1}$ ) 2994, 1741, 1241, 1044. Anal.Calcd for  $\text{C}_{26}\text{H}_{28}\text{O}_8$ : C 66.66, H 6.02; Found: C 66.38, H 5.75.

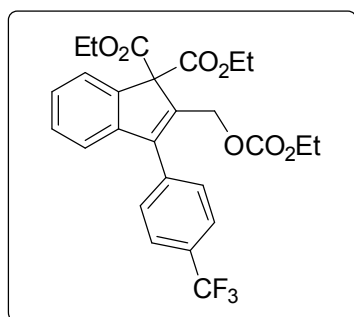

**3g**: mp: 91-92 °C.  $^1\text{H}$  NMR (300 MHz,  $\text{CDCl}_3$ )  $\delta$  7.77-7.74 (m, 3H), 7.60-7.57 (d,  $J = 8.4$  Hz, 2H), 7.37-7.34 (m, 2H), 7.17-7.14 (m, 1H), 5.12 (s, 2H), 4.32-4.11 (m, 6H), 1.31-1.24 (q,  $J = 6.9$  Hz, 9H).  $^{13}\text{C}$  NMR (75 MHz,  $\text{CDCl}_3$ )  $\delta$  167.4, 154.7, 148.0, 143.4, 140.4, 136.4, 134.8, 129.4, 128.8, 127.6, 125.6, 125.6, 125.5, 121.2, 70.4, 64.0, 62.4, 14.2, 13.8. IR (KBr,  $\text{cm}^{-1}$ ) 2978, 1745, 1725, 1257, 1116. Anal.Calcd for  $\text{C}_{26}\text{H}_{25}\text{F}_3\text{O}_7$ : C 61.66, H 4.98; Found: C 61.47, H 4.68.

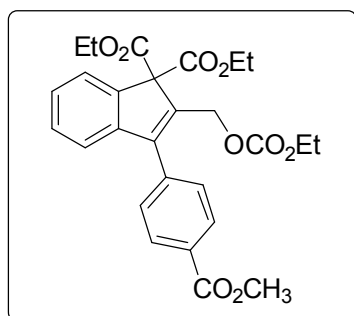

**3h**: mp: 71-72 °C.  $^1\text{H}$  NMR (300 MHz,  $\text{CDCl}_3$ )  $\delta$  8.18-8.15 (d,  $J = 8.1$  Hz, 2H), 7.76-7.73 (m, 1H), 7.56-7.53 (d,  $J = 8.4$  Hz, 2H), 7.37-7.34 (m, 2H), 7.19-7.17 (m, 1H), 5.12 (s, 2H), 4.30-4.12 (m, 6H), 3.96 (s, 3H), 1.31-1.25 (m, 9H).  $^{13}\text{C}$  NMR (75 MHz,  $\text{CDCl}_3$ )  $\delta$  167.5, 166.7, 154.7, 148.5, 143.4, 140.5, 137.4, 134.6, 130.2, 129.9, 129.0, 128.7, 127.5, 125.5, 121.3, 70.4, 63.9, 62.5, 62.4, 52.3, 14.2, 13.9. IR (KBr,

cm<sup>-1</sup>) 2923, 1739, 1258, 1046. Anal.Calcd for C<sub>27</sub>H<sub>28</sub>O<sub>9</sub>: C 65.31, H 5.68; Found: C 65.60, H 5.74.

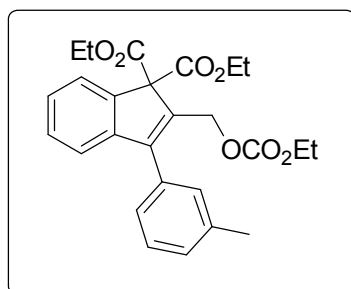

**3i:** mp: 102-103 °C. <sup>1</sup>H NMR (300 MHz, CDCl<sub>3</sub>) δ 7.74-7.71 (m, 1H), 7.39-7.30 (m, 3H), 7.25-7.21 (m, 4H), 5.14 (s, 2H), 4.31-4.12 (m, 6H), 2.41 (s, 3H), 1.30-1.25 (t, *J* = 7.5 Hz, 9H). <sup>13</sup>C NMR (75 MHz, CDCl<sub>3</sub>) δ 167.8, 154.8, 149.7, 144.0, 140.6, 138.2, 133.4, 132.5, 129.5, 129.3, 128.6, 128.5, 127.2, 126.0, 125.3, 121.6, 70.2, 63.8, 62.8, 62.2, 21.5, 14.3, 13.9. IR (KBr, cm<sup>-1</sup>) 3001, 1735, 1255, 1044. Anal.Calcd for C<sub>26</sub>H<sub>28</sub>O<sub>7</sub>: C 69.01, H 6.24; Found: C 68.78, H 6.12.

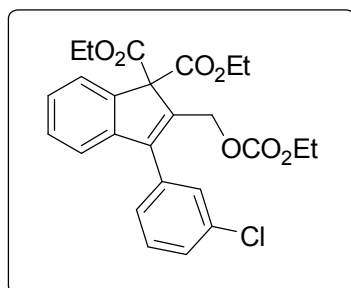

**3j:** mp: 70-70.5 °C. <sup>1</sup>H NMR (300 MHz, CDCl<sub>3</sub>) δ 7.75-7.72 (m, 1H), 7.45-7.42 (m, 3H), 7.37-7.32 (m, 3H), 7.20-7.17 (m, 1H), 5.13 (s, 2H), 4.29-4.13 (m, 6H), 1.31-1.26 (m, 9H). <sup>13</sup>C NMR (75 MHz, CDCl<sub>3</sub>) δ 167.4, 154.7, 148.0, 143.4, 140.4, 134.5, 134.4, 130.0, 128.9, 128.7, 127.5, 127.1, 125.4, 121.3, 70.3, 63.9, 62.4, 62.3, 14.2, 13.8. IR (KBr, cm<sup>-1</sup>) 2987, 1735, 1255, 1043. Anal.Calcd for C<sub>25</sub>H<sub>25</sub>ClO<sub>7</sub>: C 63.49, H 5.33; Found: C 63.52, H 5.04.

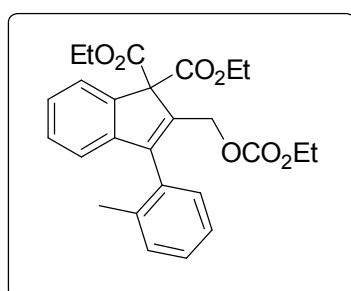

**3k:** oil. <sup>1</sup>H NMR (300 MHz, CDCl<sub>3</sub>) δ 7.74-7.72 (m, 1H), 7.34-7.23 (m, 5H), 7.20-7.18 (m, 1H), 6.90-6.87 (m, 1H), 5.08-5.04 (d, *J* = 12.3 Hz, 1H), 5.00-4.97 (d, *J* = 12.3 Hz, 1H), 4.30-4.17 (m, 4H), 4.12-4.05 (q, *J* = 6.9 Hz, 2H), 2.15 (s, 3H), 1.32-1.20 (m, 9H). <sup>13</sup>C NMR (75 MHz, CDCl<sub>3</sub>) δ 168.0, 167.5, 154.8, 149.3, 144.4, 140.4, 136.6, 134.6, 132.3, 130.1, 129.2, 128.6, 128.4, 127.1, 125.8, 125.0, 121.3, 70.2, 63.7, 62.8, 62.2, 19.5, 14.2, 13.9. IR (KBr, cm<sup>-1</sup>) 2983, 1746, 1252, 1051.

Anal.Calcd for C<sub>26</sub>H<sub>28</sub>O<sub>7</sub>: C 69.01, H 6.24; Found: C 68.83, H 5.98.

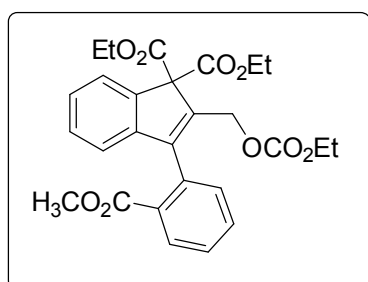

**3l:** oil. <sup>1</sup>H NMR (400 MHz, CDCl<sub>3</sub>) δ 8.11-8.09 (m, 1H), 7.73-7.70 (m, 1H), 7.63-7.59 (m, 1H), 7.54-7.50 (m, 1H), 7.36-7.34 (m, 1H), 7.30-7.26 (m, 2H), 6.84-6.82 (m, 1H), 5.10-5.07 (dd, *J*<sub>1</sub> = 0.9 Hz, *J*<sub>2</sub> = 8.4 Hz, 1H), 5.00-4.97 (dd, *J*<sub>1</sub> = 0.9 Hz, *J*<sub>2</sub> = 8.4 Hz, 1H), 4.31-4.20 (m, 4H), 4.11-4.06 (m, 2H), 3.48 (s, 3H), 1.32-1.21 (m, 9H). <sup>13</sup>C NMR (100 MHz, CDCl<sub>3</sub>) δ 167.8, 167.6, 167.2, 154.8, 149.6, 145.0, 140.0, 133.7, 133.1, 132.2, 130.9, 130.6, 128.6, 128.6, 127.0, 125.1, 120.7, 70.4, 63.7, 62.7, 62.2, 51.9, 14.2, 13.9. IR (KBr, cm<sup>-1</sup>) 2983, 1740, 1258, 1042. Anal.Calcd for C<sub>27</sub>H<sub>28</sub>O<sub>9</sub>: C 65.31, H 5.68; Found: C 65.29, H 5.92.

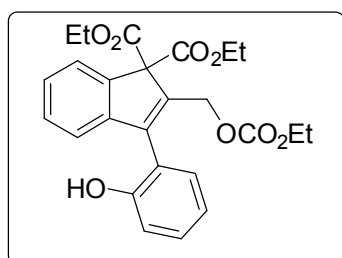

**3m:** oil. <sup>1</sup>H NMR (300 MHz, CDCl<sub>3</sub>) δ 7.73-7.70 (m, 1H), 7.33-7.30 (m, 2H), 7.26-7.19 (m, 1H), 7.12-7.07 (m, 2H), 6.84-6.77 (m, 2H), 5.10(s, 2H), 4.34-4.07 (m, 6H), 3.74 (s, 1H), 1.32-1.21 (m, 9H). <sup>13</sup>C NMR (75 MHz, CDCl<sub>3</sub>) δ 168.1, 167.3, 154.7, 146.5, 144.3, 143.6, 140.7, 136.1, 129.9, 129.7, 128.7, 127.4, 125.1, 121.7, 118.0, 117.4, 115.4, 70.2, 63.8, 63.0, 62.4, 62.3, 14.2, 13.9. IR (KBr, cm<sup>-1</sup>) 3471, 3379, 2983, 1744, 1253. Anal.Calcd for C<sub>25</sub>H<sub>26</sub>O<sub>8</sub>: C 66.07, H 5.77; Found: C 66.33, H 5.95.

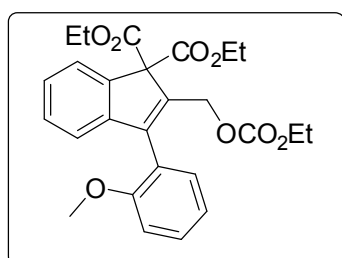

**3n:** mp:76-77 °C. <sup>1</sup>H NMR (300 MHz, CDCl<sub>3</sub>) δ 7.72-7.69 (m, 1H), 7.42-7.37 (m, 1H), 7.30-7.26 (m, 3H), 7.06-6.99 (m, 3H), 5.23-5.19 (d, *J* = 12.3 Hz, 1H), 5.01-4.97 (d, *J* = 12.3 Hz, 1H), 4.30-4.06 (m, 6H), 3.74 (s, 3H), 1.31-1.21 (m, 9H). <sup>13</sup>C NMR (75 MHz, CDCl<sub>3</sub>) δ 168.0, 167.7, 157.1, 154.8, 145.7, 144.3, 140.3, 134.8, 130.8, 130.0, 128.3, 126.7, 125.0, 121.6, 120.5, 111.3, 70.2, 63.7, 63.4, 62.2, 62.1, 55.5, 14.2, 13.9, 13.8. IR (KBr, cm<sup>-1</sup>) 2927, 1741, 1247. Anal.Calcd for C<sub>26</sub>H<sub>28</sub>O<sub>8</sub>: C 66.66, H 6.02; Found: C 66.59, H 5.83.

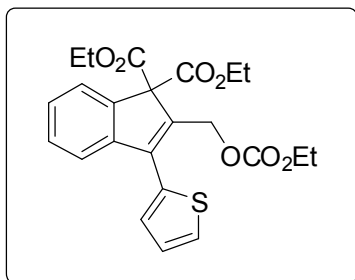

**3o:** mp:80-80.5 °C.  $^1\text{H}$  NMR (300 MHz,  $\text{CDCl}_3$ )  $\delta$  7.74-7.72 (m, 1H), 7.59-7.56 (m, 1H), 7.51-7.49 (m, 1H), 7.42-7.33 (m, 3H), 7.20-7.17 (m, 1H), 5.24 (s, 2H), 4.30-4.16 (m, 6H), 1.32-1.25 (m, 9H).  $^{13}\text{C}$  NMR (75 MHz,  $\text{CDCl}_3$ )  $\delta$  167.4, 154.8, 143.1, 142.5, 140.2, 134.1, 132.9, 128.7, 128.6, 127.5, 127.2, 125.4, 121.7, 70.4, 63.9, 62.7, 62.3, 14.3, 13.8. IR (KBr,  $\text{cm}^{-1}$ ) 2983, 1742, 1251, 1043. Anal.Calcd for  $\text{C}_{23}\text{H}_{24}\text{O}_7\text{S}$ : C 62.15, H 5.44; Found: C 61.86, H 5.24.

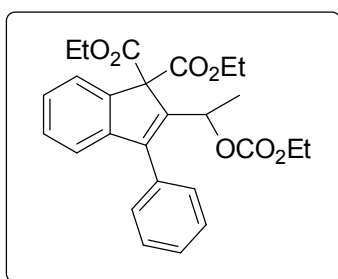

**3p:** mp:78-80 °C.  $^1\text{H}$  NMR (400 MHz,  $\text{CDCl}_3$ )  $\delta$  7.68-7.66 (m, 1H), 7.48-7.42 (m, 5H), 7.31-7.26 (m, 2H), 7.05-7.02 (m, 1H), 5.95-5.93 (m, 1H), 4.30-4.10 (m, 6H), 1.37-1.35 (m, 3H), 1.30-1.22 (m, 9H).  $^{13}\text{C}$  NMR (100 MHz,  $\text{CDCl}_3$ )  $\delta$  167.9, 167.8, 154.4, 147.5, 145.3, 140.0, 138.4, 134.0, 129.2, 128.6, 128.4, 128.2, 127.0, 124.7, 121.2, 71.4, 63.6, 62.1, 19.3, 14.3, 13.9, 13.8. IR (KBr,  $\text{cm}^{-1}$ ) 2985, 1741, 1265, 1047. Anal.Calcd for  $\text{C}_{26}\text{H}_{28}\text{O}_7$ : C 69.01, H 6.24; Found: C 69.25, H 6.06.

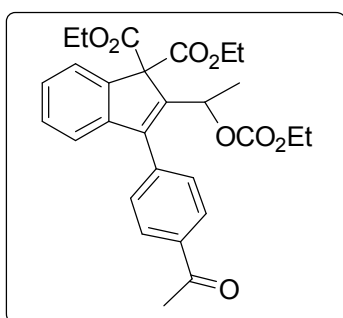

**3q:** mp:85-86 °C.  $^1\text{H}$  NMR (300 MHz,  $\text{CDCl}_3$ )  $\delta$  8.10-8.05 (m, 2H), 7.74-7.68 (m, 1H), 7.60-7.57 (m, 2H), 7.32-7.27 (m, 2H), 6.99-6.97 (m, 1H), 5.95-5.92 (m, 1H), 4.32-4.10 (m, 6H), 2.67 (s, 3H), 1.37-1.25 (m, 12H).  $^{13}\text{C}$  NMR (75 MHz,  $\text{CDCl}_3$ )  $\delta$  197.6, 167.6, 167.4, 154.2, 146.4, 144.7, 139.8, 139.2, 139.0, 136.7, 129.5, 128.9, 128.7, 128.3, 127.2, 124.9, 120.9, 71.3, 71.0, 63.6, 62.3, 26.6, 19.4, 14.2, 13.8, 13.7. IR (KBr,  $\text{cm}^{-1}$ ) 2988, 1730, 1682, 1260. Anal.Calcd for  $\text{C}_{28}\text{H}_{30}\text{O}_8$ : C 68.00, H 6.11; Found: C 68.29, H 6.05.



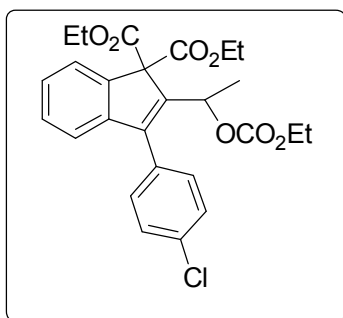

**3r:** mp:96-97 °C.  $^1\text{H}$  NMR (400 MHz,  $\text{CDCl}_3$ )  $\delta$  7.69-7.66 (m, 1H), 7.47-7.45 (m, 2H), 7.42-7.39 (m, 2H), 7.33-7.29 (m, 2H), 7.01-6.99 (m, 1H), 5.94-5.89 (m, 1H), 4.32-4.09 (m, 6H), 1.41-1.35 (m, 3H), 1.33-1.20 (m, 9H).  $^{13}\text{C}$  NMR (100 MHz,  $\text{CDCl}_3$ )  $\delta$  167.8, 167.5, 154.3, 146.4, 145.0, 139.9, 138.9, 134.3, 132.4, 130.6, 128.7, 127.2, 124.9, 121.0, 109.8, 71.1, 63.6, 62.2, 19.4, 14.3, 13.9, 13.8. IR (KBr,  $\text{cm}^{-1}$ ) 2984, 1743, 1260, 1048. Anal.Calcd for  $\text{C}_{26}\text{H}_{27}\text{ClO}_7$ : C 64.13, H 5.59; Found: C 64.43, H 5.68.

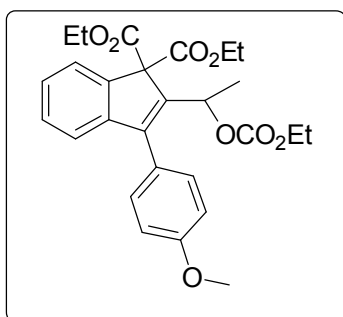

**3s:** mp:66-67 °C.  $^1\text{H}$  NMR (300 MHz,  $\text{CDCl}_3$ )  $\delta$  7.68-7.65 (m, 1H), 7.42-7.39 (d,  $J = 8.7$  Hz, 2H), 7.31-7.28 (m, 2H), 7.09-7.06 (m, 1H), 7.02-7.00 (d,  $J = 8.1$  Hz, 2H), 5.95-5.93 (m, 1H), 4.31-4.10 (m, 6H), 3.87 (s, 3H), 1.39-1.36 (d,  $J = 6.9$  Hz, 3H), 1.31-1.23 (m, 9H).  $^{13}\text{C}$  NMR (75 MHz,  $\text{CDCl}_3$ )  $\delta$  168.0, 167.9, 159.6, 154.4, 147.3, 145.5, 140.0, 137.9, 130.4, 128.5, 126.9, 126.1, 124.7, 121.2, 113.9, 71.4, 63.5, 62.1, 55.2, 19.1, 14.3, 13.9, 13.8. IR (KBr,  $\text{cm}^{-1}$ ) 2984, 1730, 1251, 1049. Anal.Calcd for  $\text{C}_{27}\text{H}_{30}\text{O}_8$ : C 67.21, H 6.27; Found: C 67.04, H 5.98.

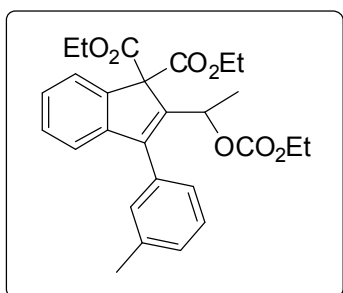

**3t:** mp:94-95 °C.  $^1\text{H}$  NMR (300 MHz,  $\text{CDCl}_3$ )  $\delta$  7.68-7.65 (m, 1H), 7.36-7.21 (m, 6H), 7.05-7.02 (m, 1H), 5.94-5.92 (m, 1H), 4.31-4.09 (m, 6H), 2.41 (s, 3H), 1.39-1.37 (d,  $J = 6.6$  Hz, 3H), 1.31-1.23 (m, 9H).  $^{13}\text{C}$  NMR (75 MHz,  $\text{CDCl}_3$ )  $\delta$  168.0, 167.8, 154.3, 147.6, 145.3, 139.9, 138.1, 137.9, 133.7, 129.7, 128.9, 128.5, 128.2, 126.9, 126.2, 124.6, 121.2, 71.4, 71.0, 63.5, 62.1, 21.4, 19.3, 14.3, 13.9, 13.8. IR (KBr,  $\text{cm}^{-1}$ ) 2986, 1731, 1258, 1042. Anal.Calcd for  $\text{C}_{27}\text{H}_{30}\text{O}_7$ : C 69.51, H 6.48; Found: C 69.35, H 6.24.

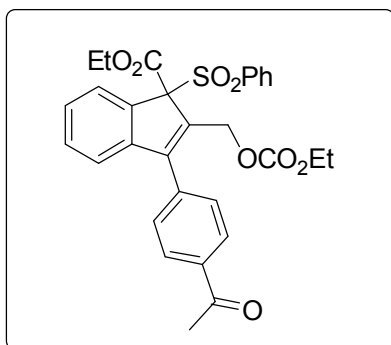

**3u:** oil.  $^1\text{H}$  NMR (400 MHz,  $\text{CDCl}_3$ )  $\delta$  8.10-8.08 (d,  $J = 7.6$  Hz, 1H), 7.98-7.96 (d,  $J = 7.6$  Hz, 2H), 7.50-7.41 (m, 2H), 7.33-7.28 (m, 3H), 7.23-7.19 (m, 2H), 7.05-7.03 (d,  $J = 8.0$  Hz, 2H), 6.77-6.75 (d,  $J = 7.6$  Hz, 1H), 5.54-5.12 (d,  $J = 12.8$  Hz, 1H), 5.08-5.05 (d,  $J = 12.4$  Hz, 1H), 4.45-4.41 (m, 2H), 4.17-4.12 (q,  $J = 7.2$  Hz, 2H), 2.63 (s, 3H), 1.41-1.38 (m, 3H), 1.29-1.25 (m, 3H).  $^{13}\text{C}$  NMR (100 MHz,  $\text{CDCl}_3$ )  $\delta$  197.3, 163.2, 151.5, 143.8, 137.2, 136.9, 136.7, 134.2, 133.8, 131.4, 130.0, 129.8, 128.6, 128.4, 127.9, 127.8, 127.5, 121.2, 74.2, 64.0, 63.4, 61.5, 26.6, 14.3, 13.9. IR (KBr,  $\text{cm}^{-1}$ ) 3411, 2923, 1741, 1249. Anal. Calcd for  $\text{C}_{30}\text{H}_{28}\text{O}_8\text{S}$ : C 65.68, H 5.14; Found: C 65.78, H 5.37.

3a

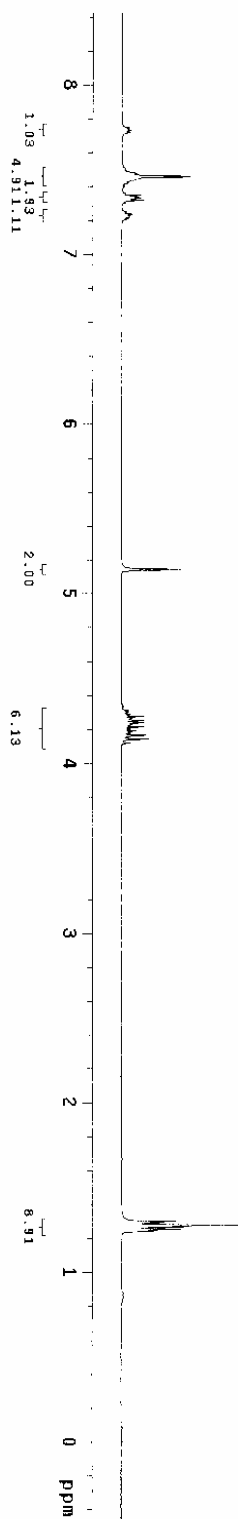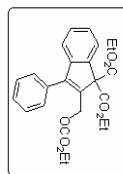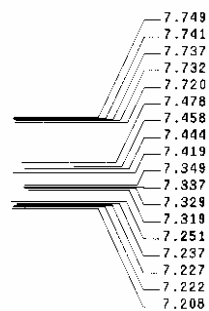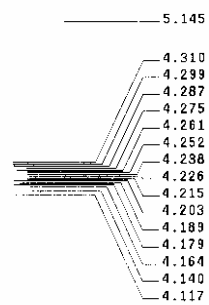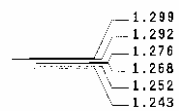

3a

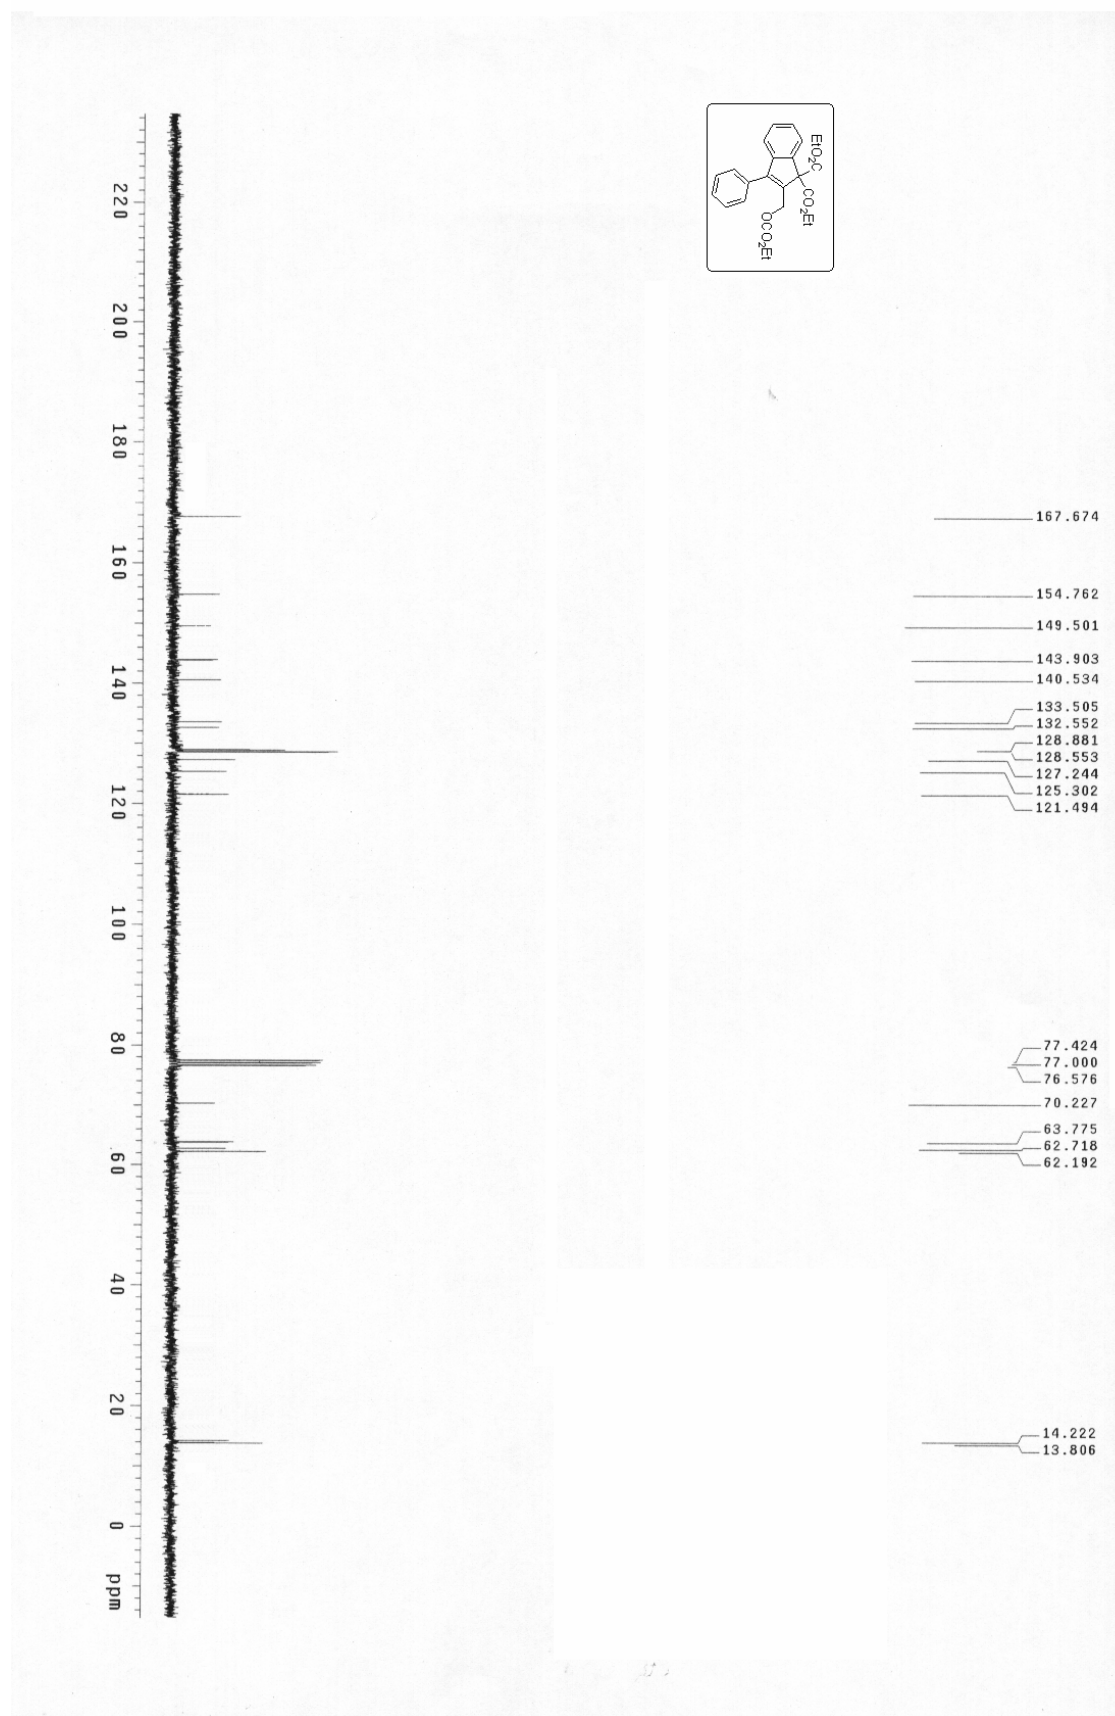

3b

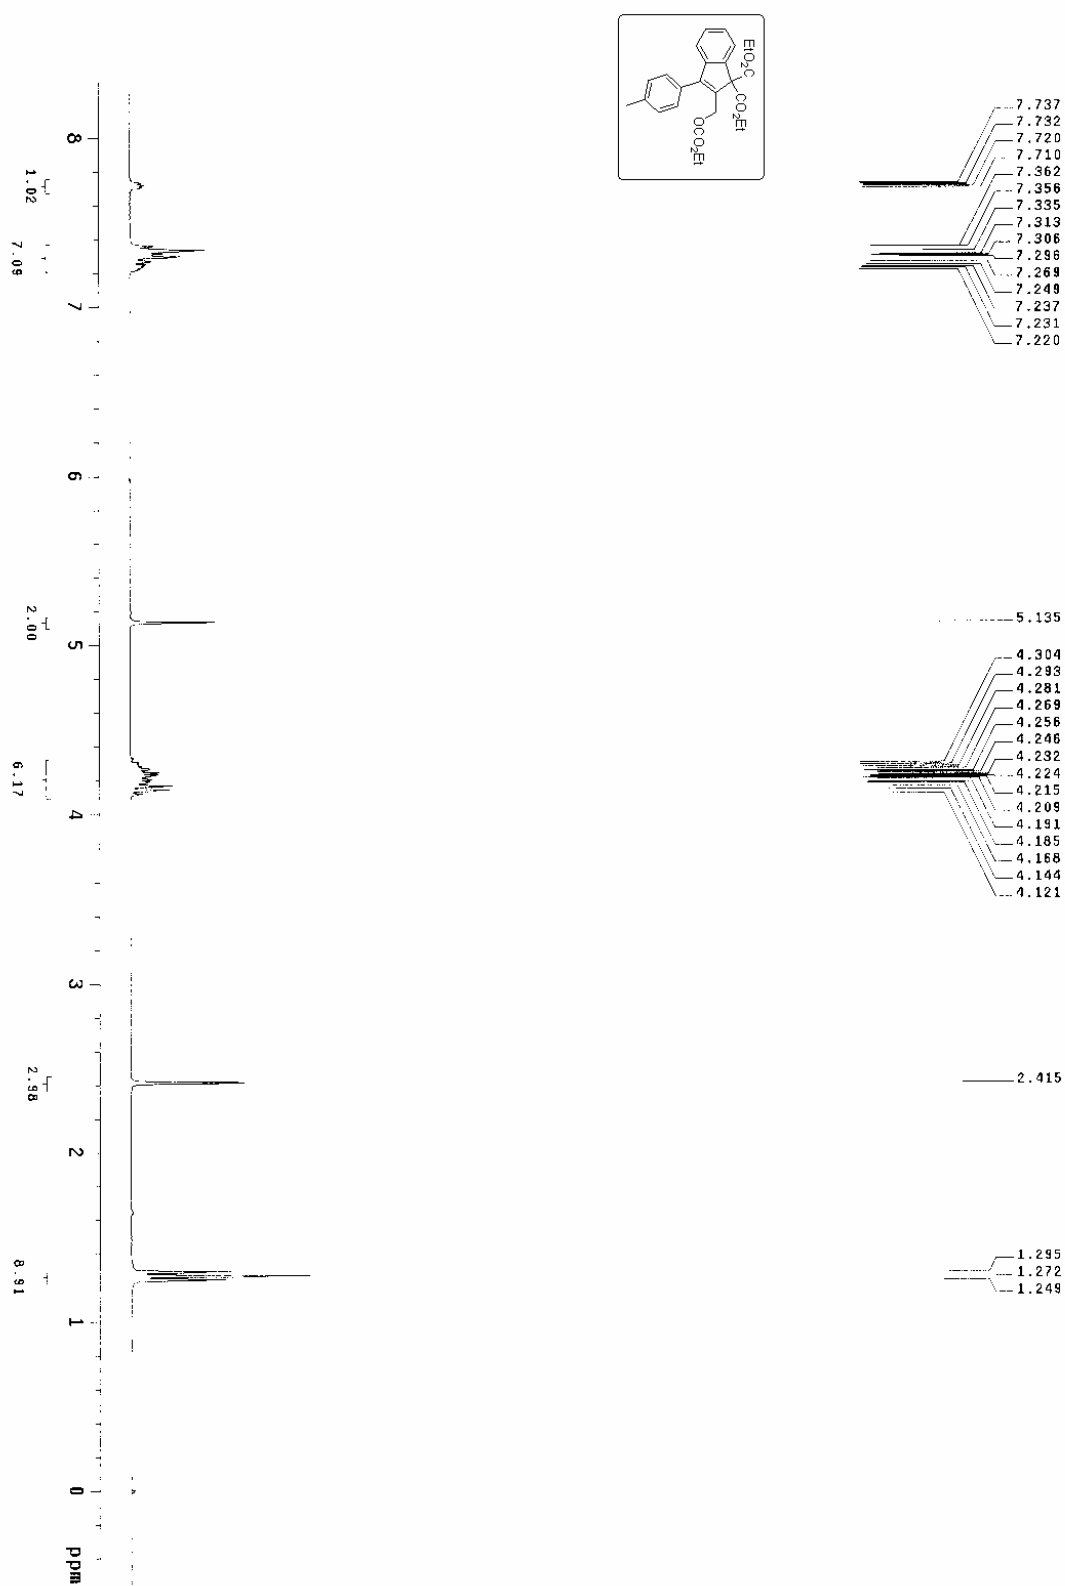

3b

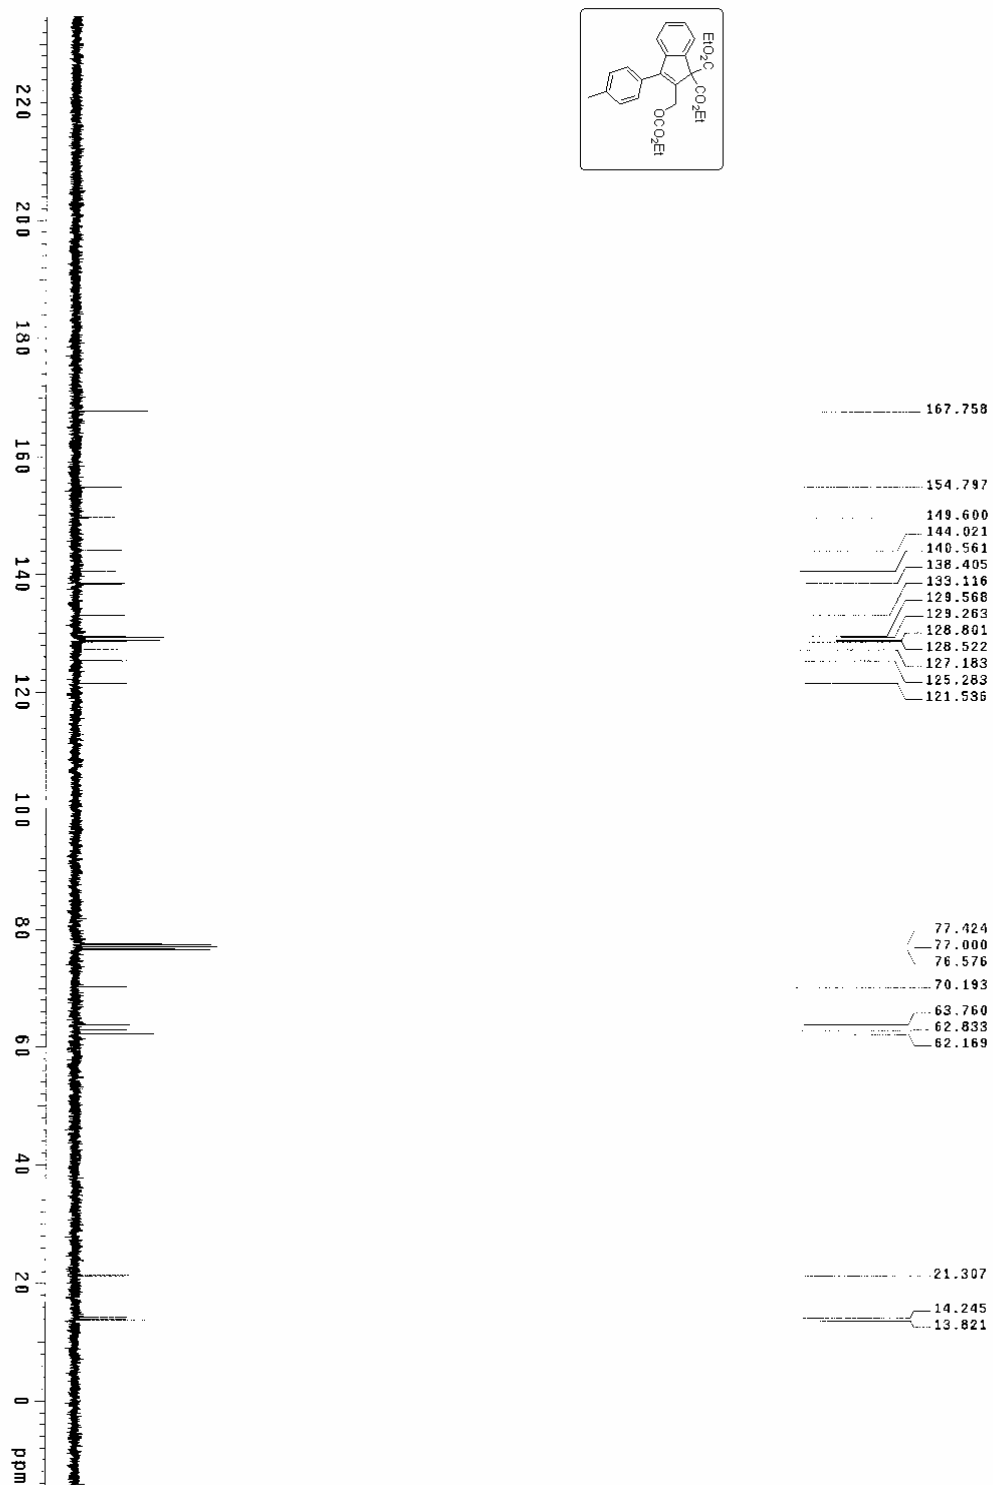

3c

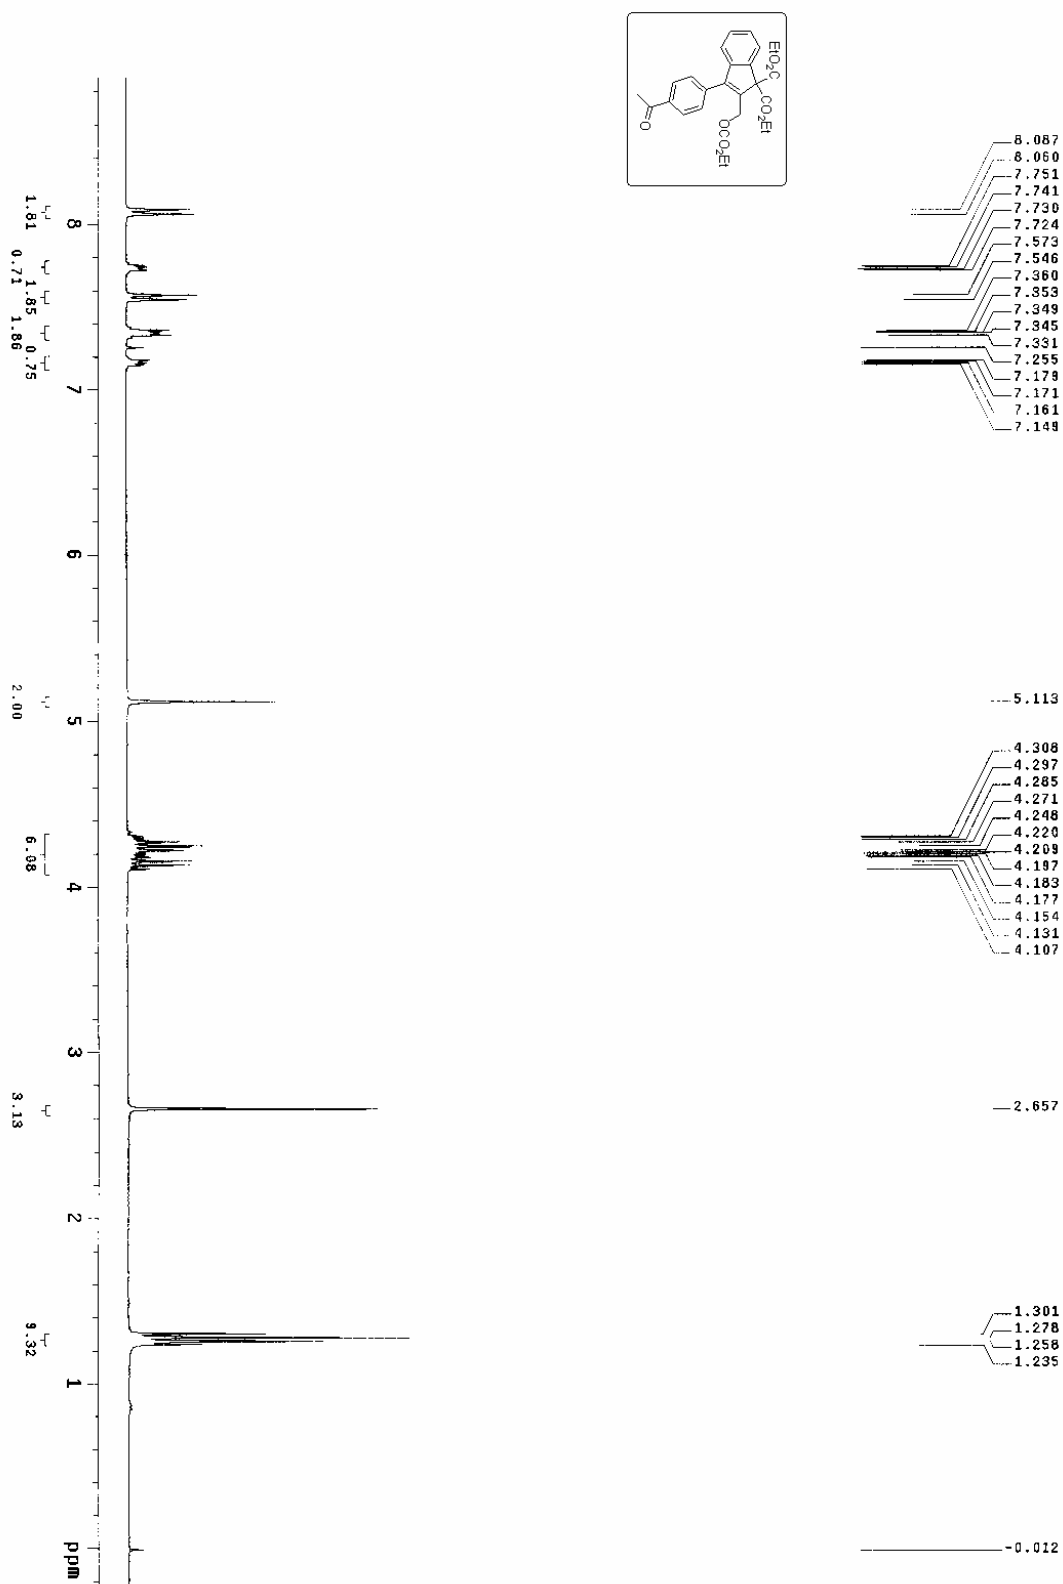

3c

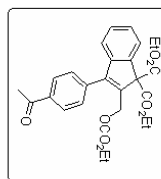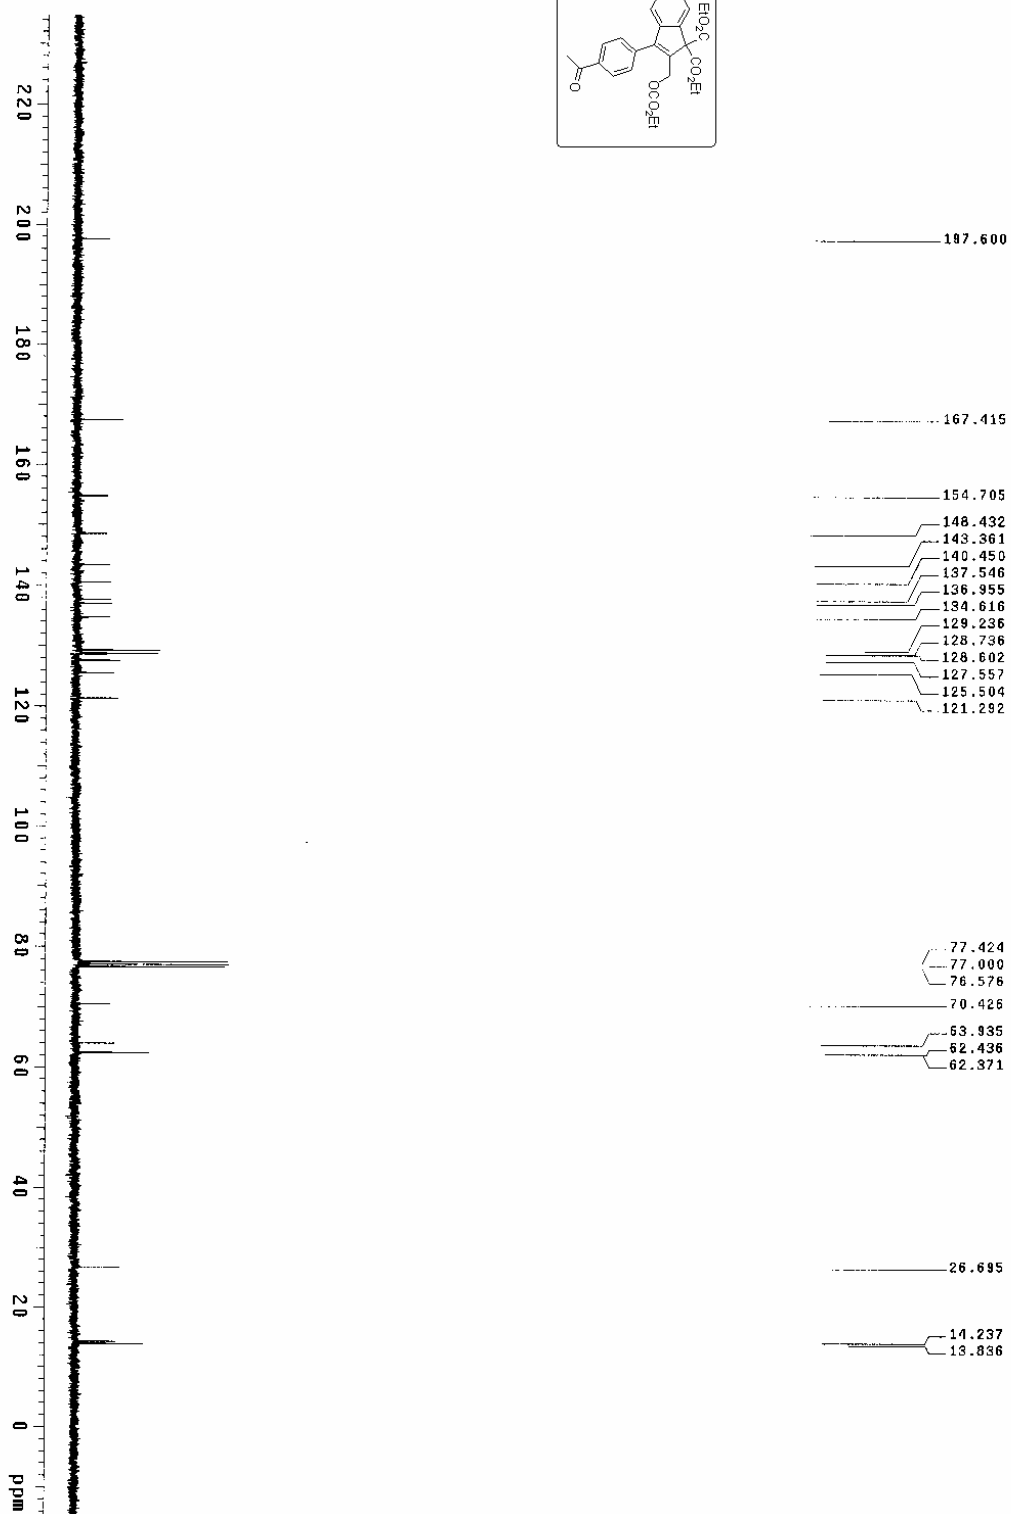



3d

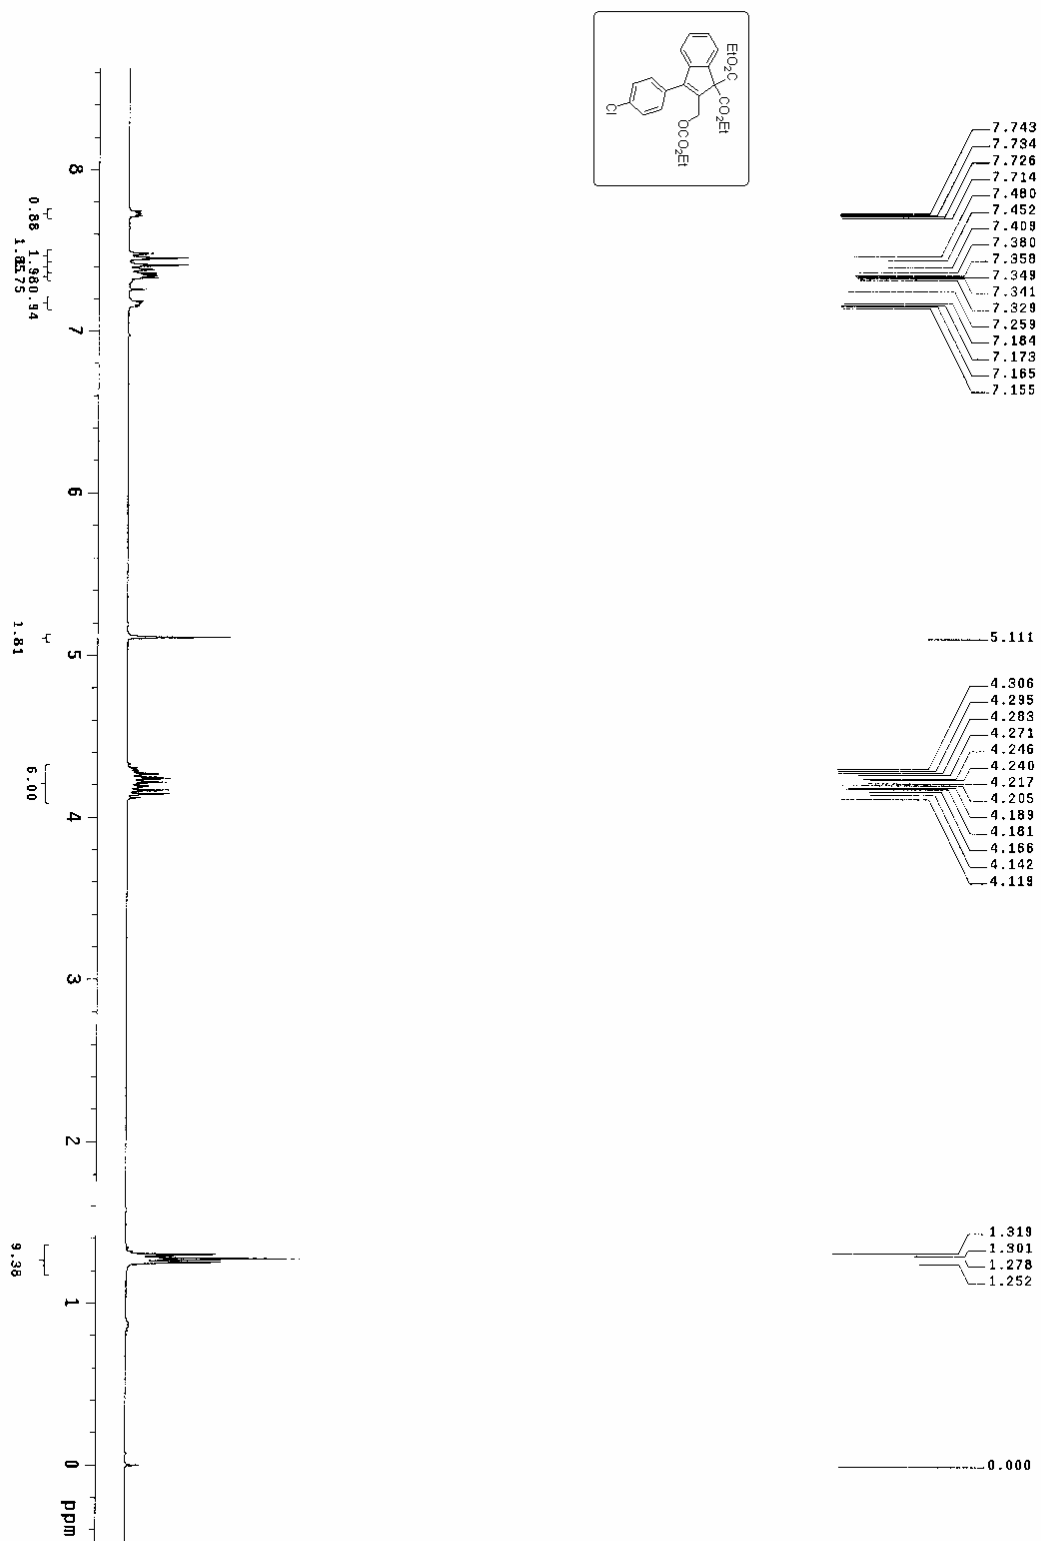

3d

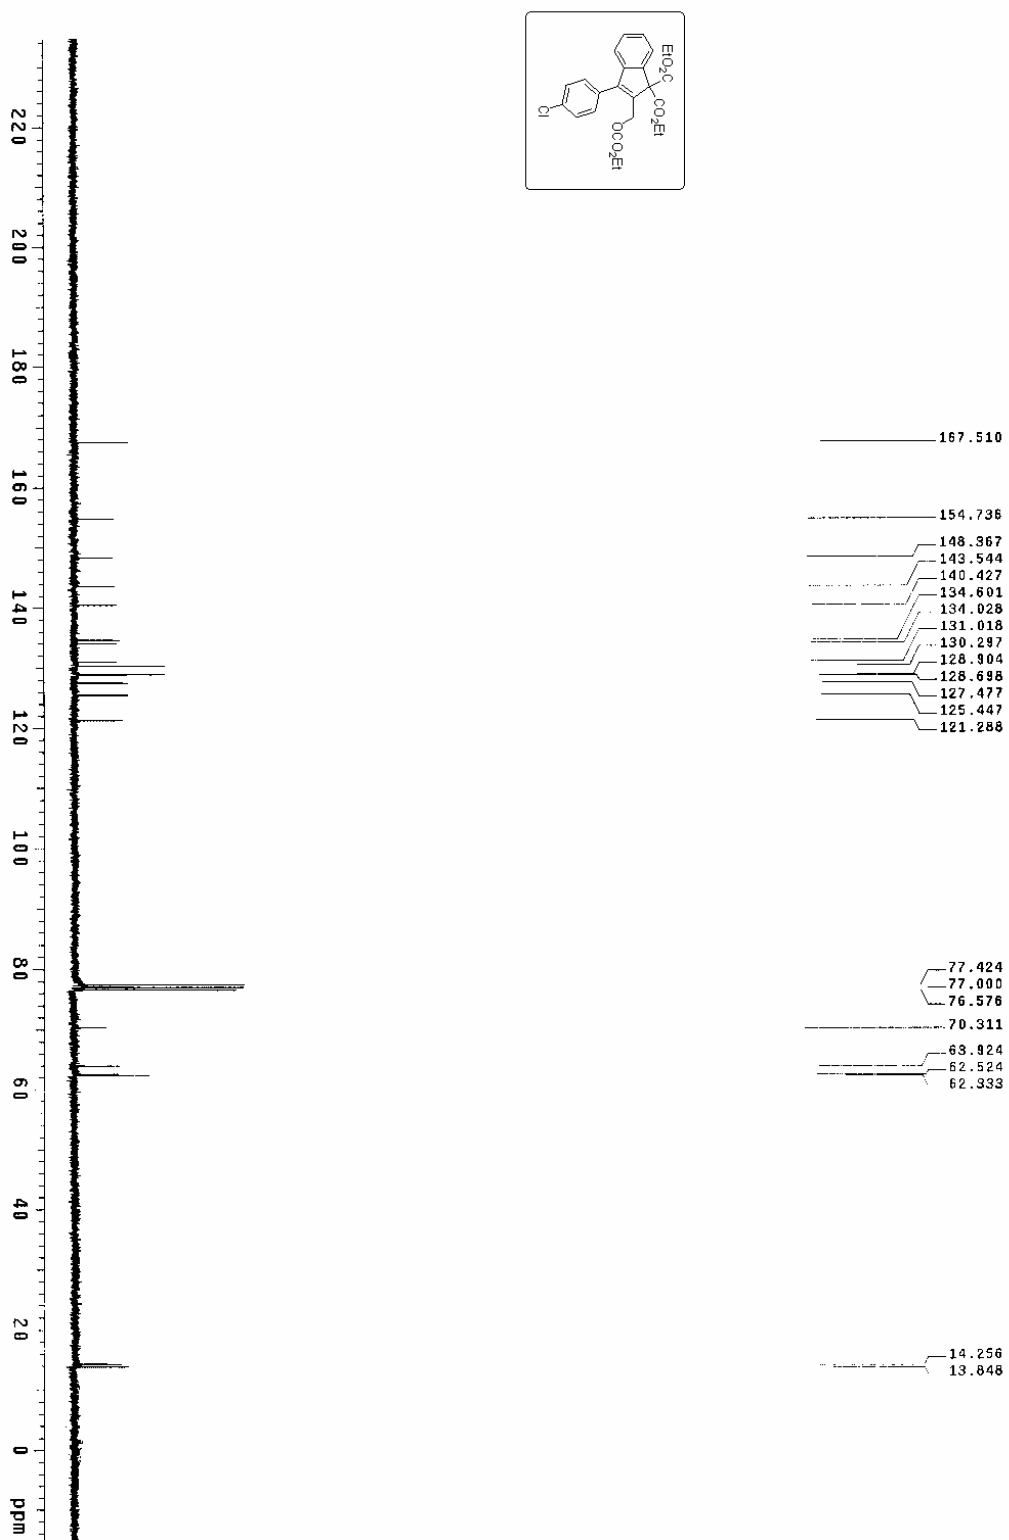

3e

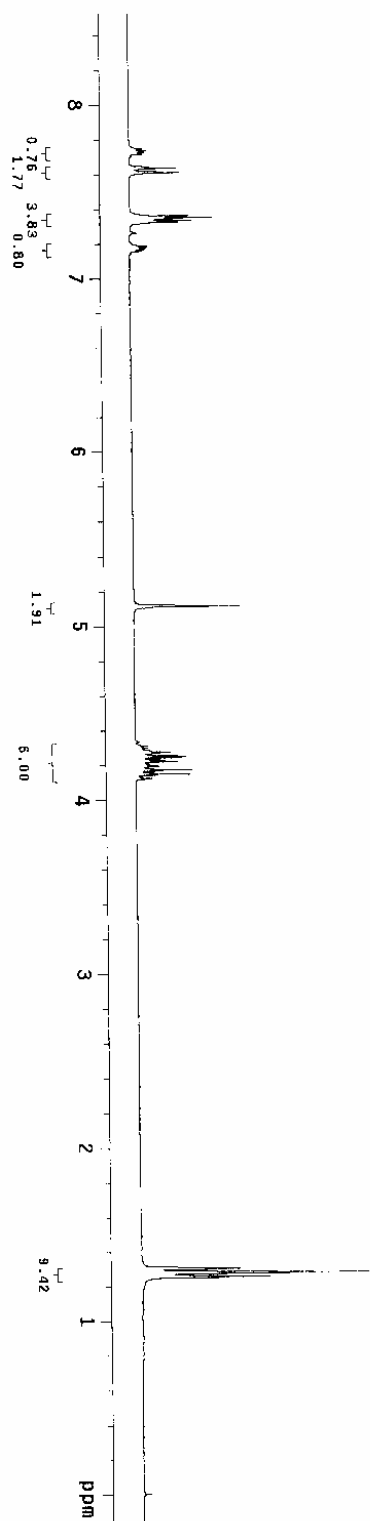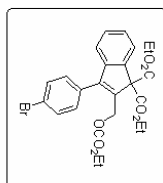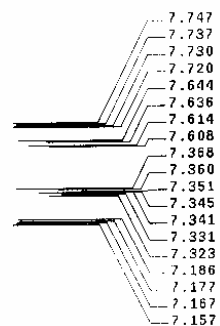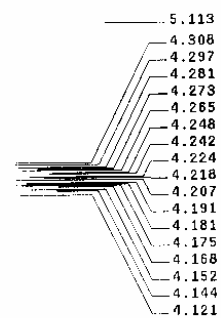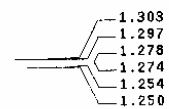

3e

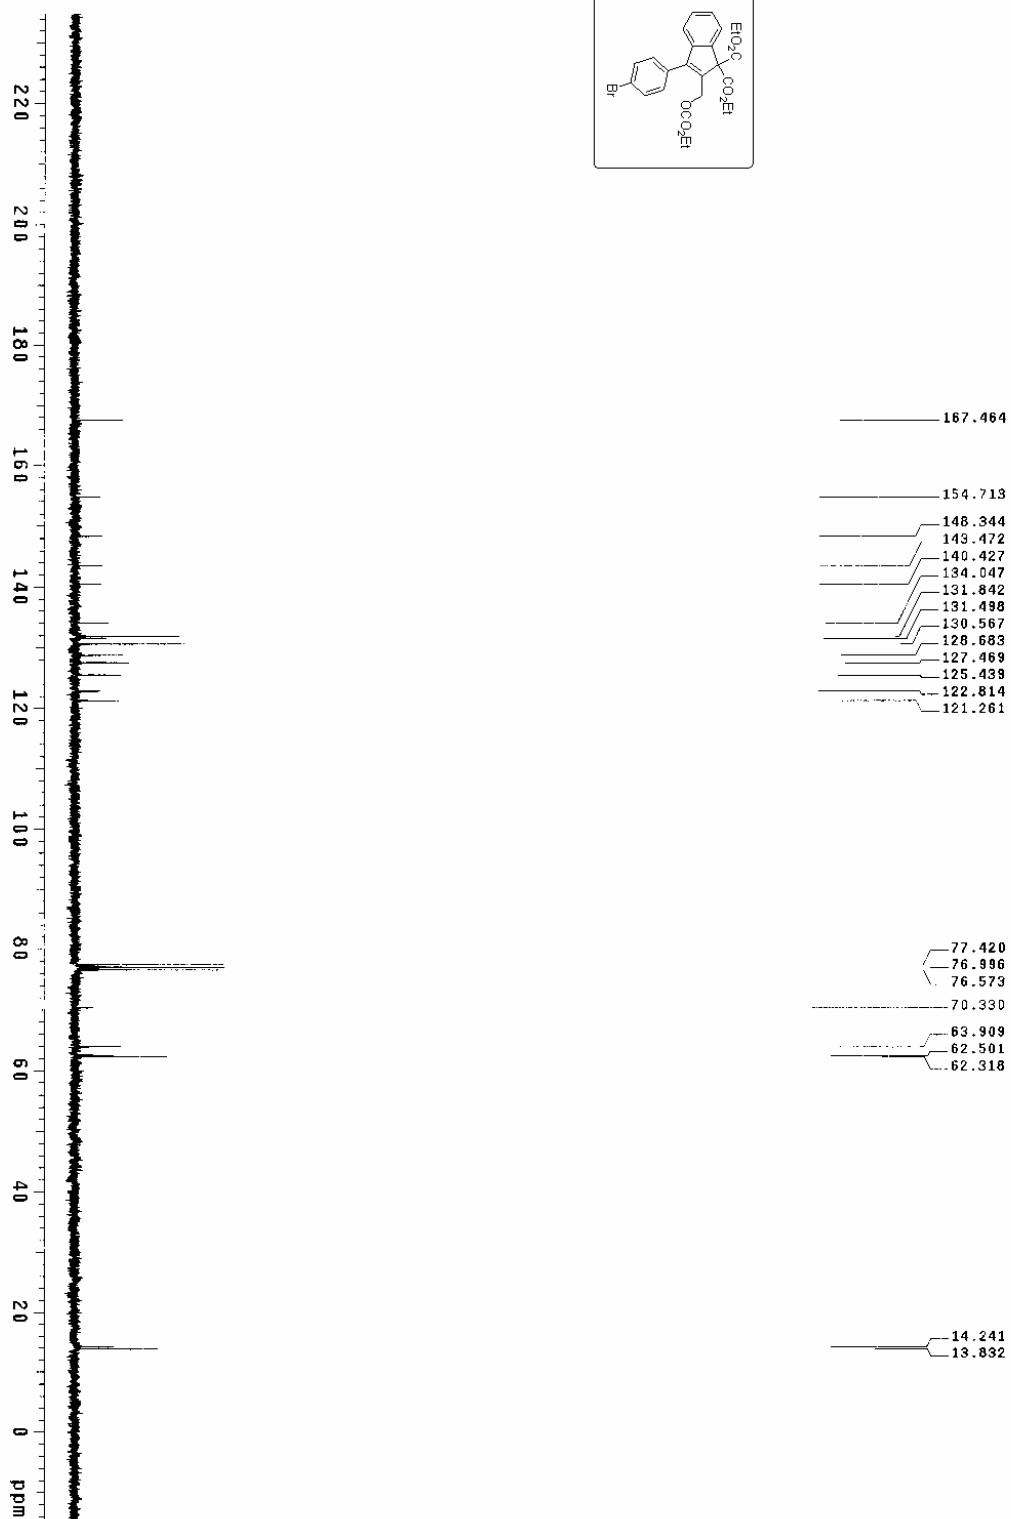

3f

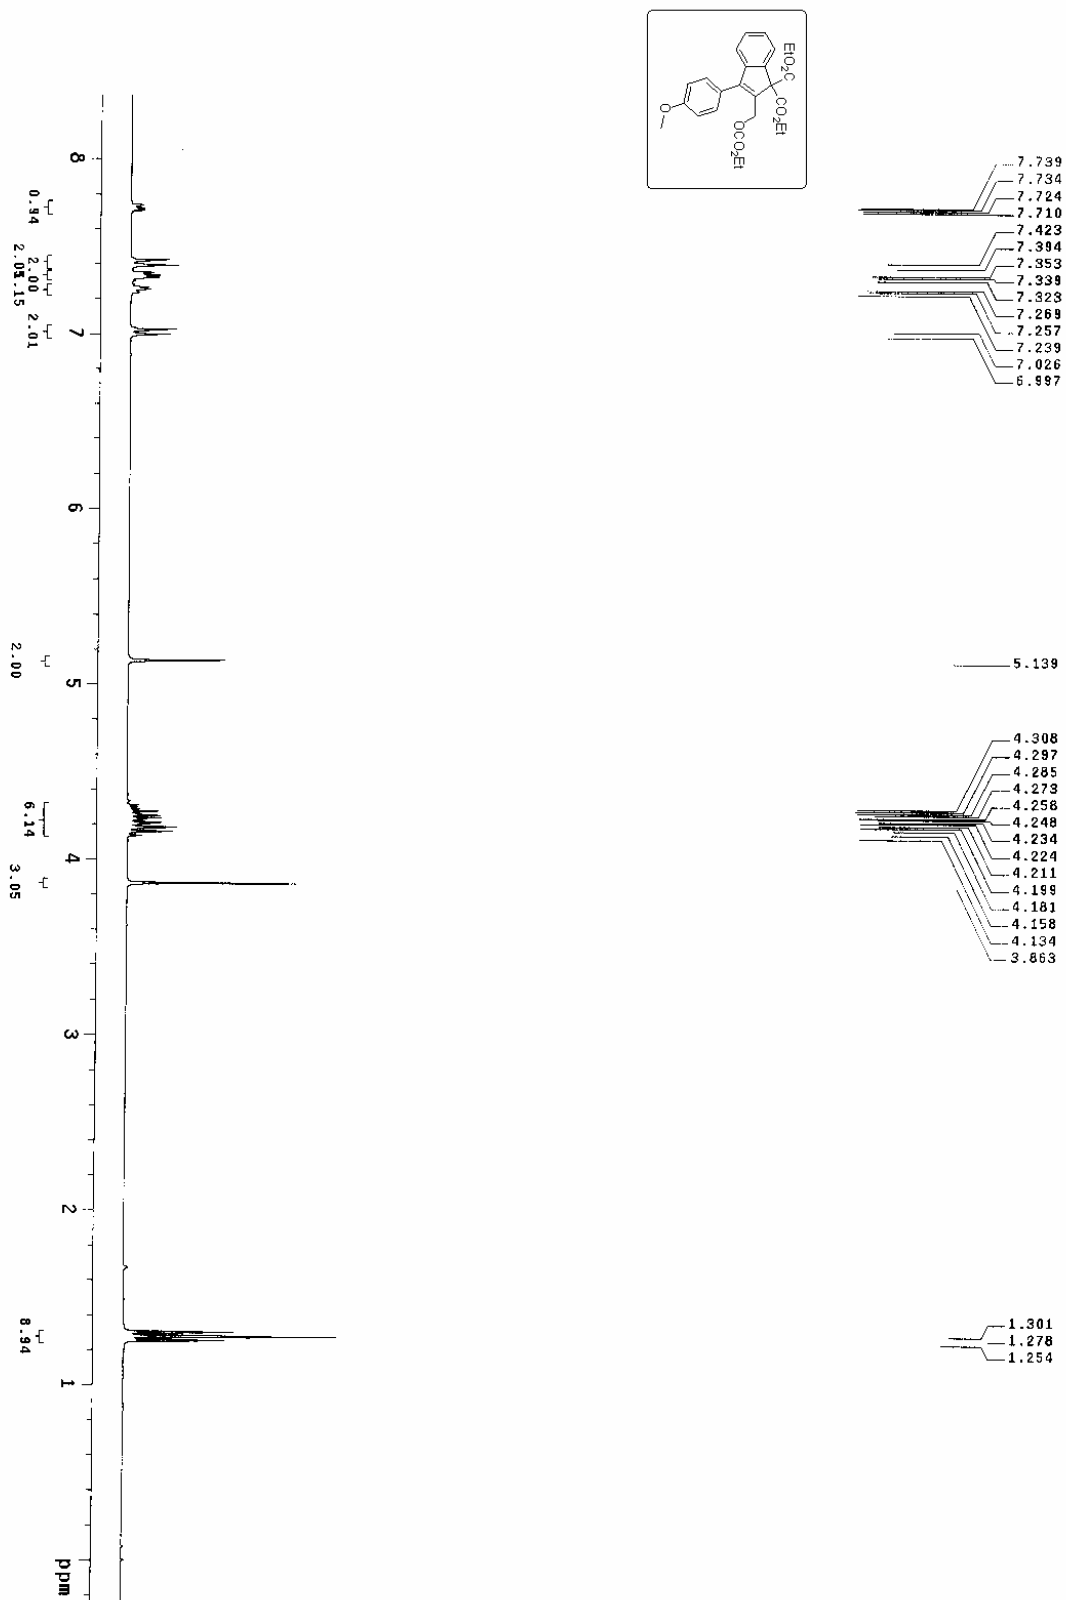

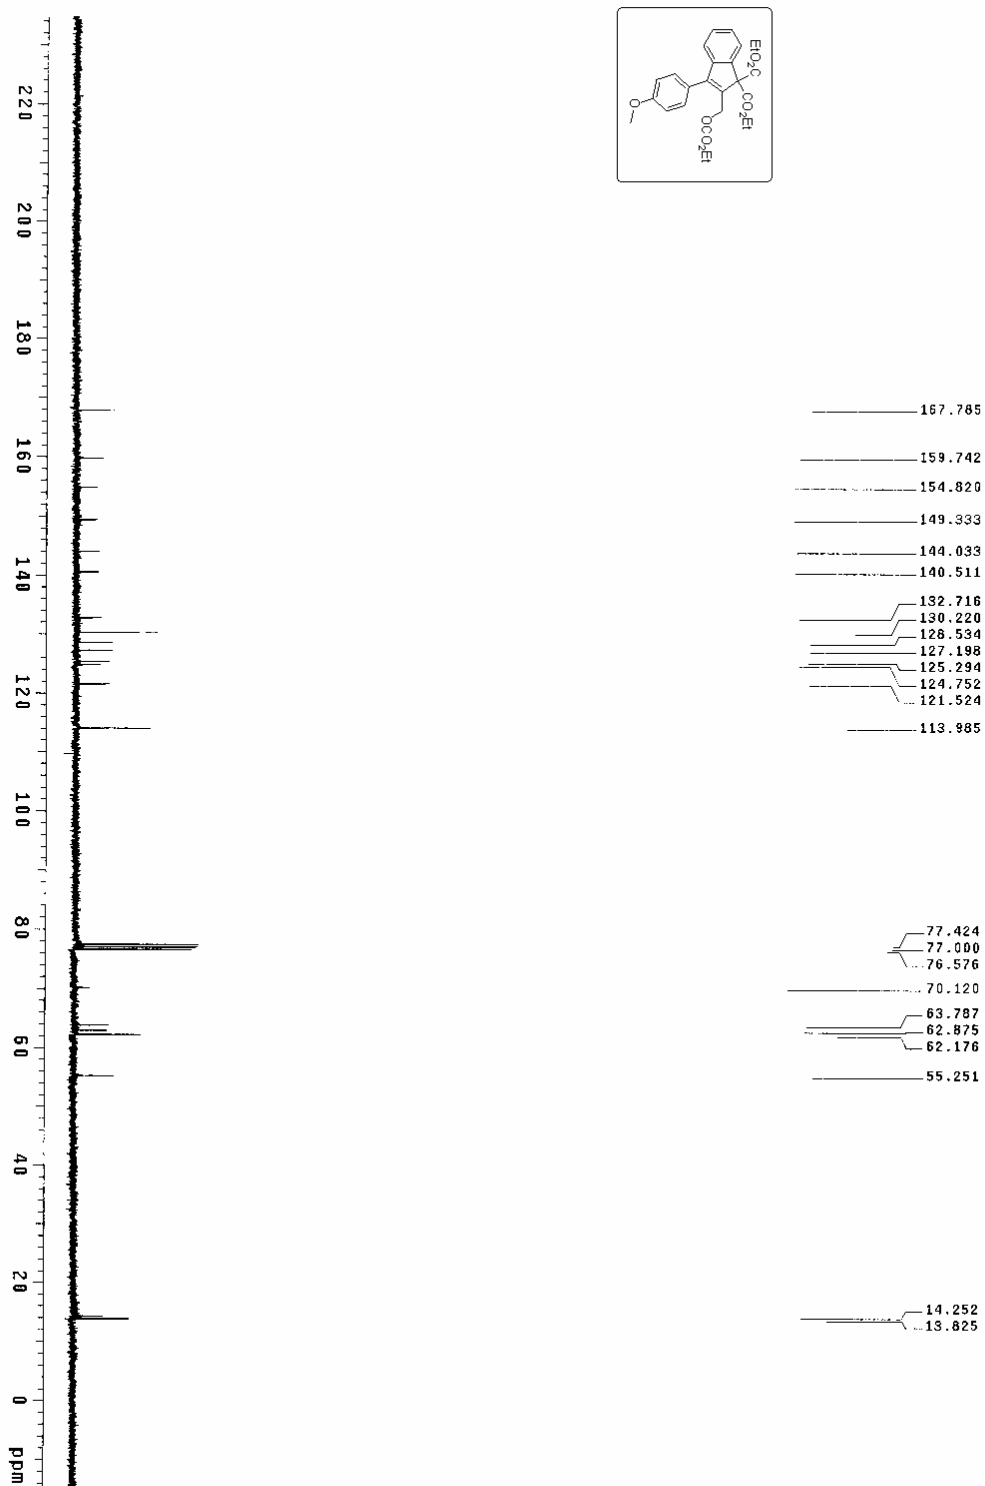

3g

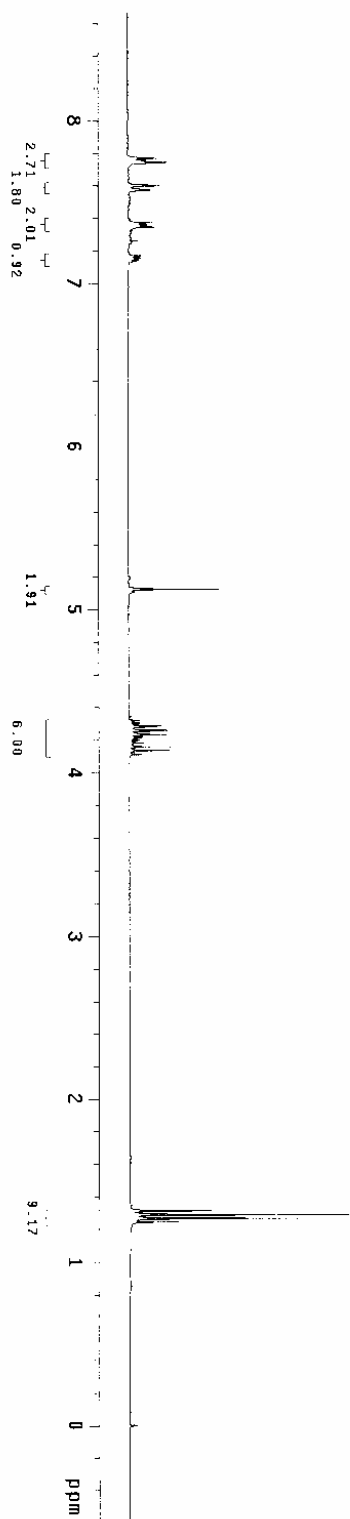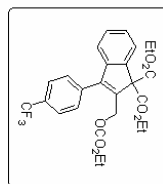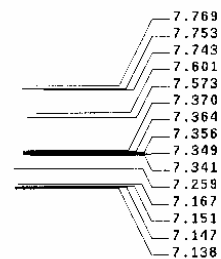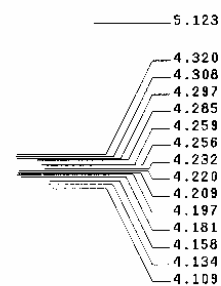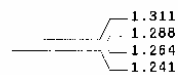

-0.000

3g

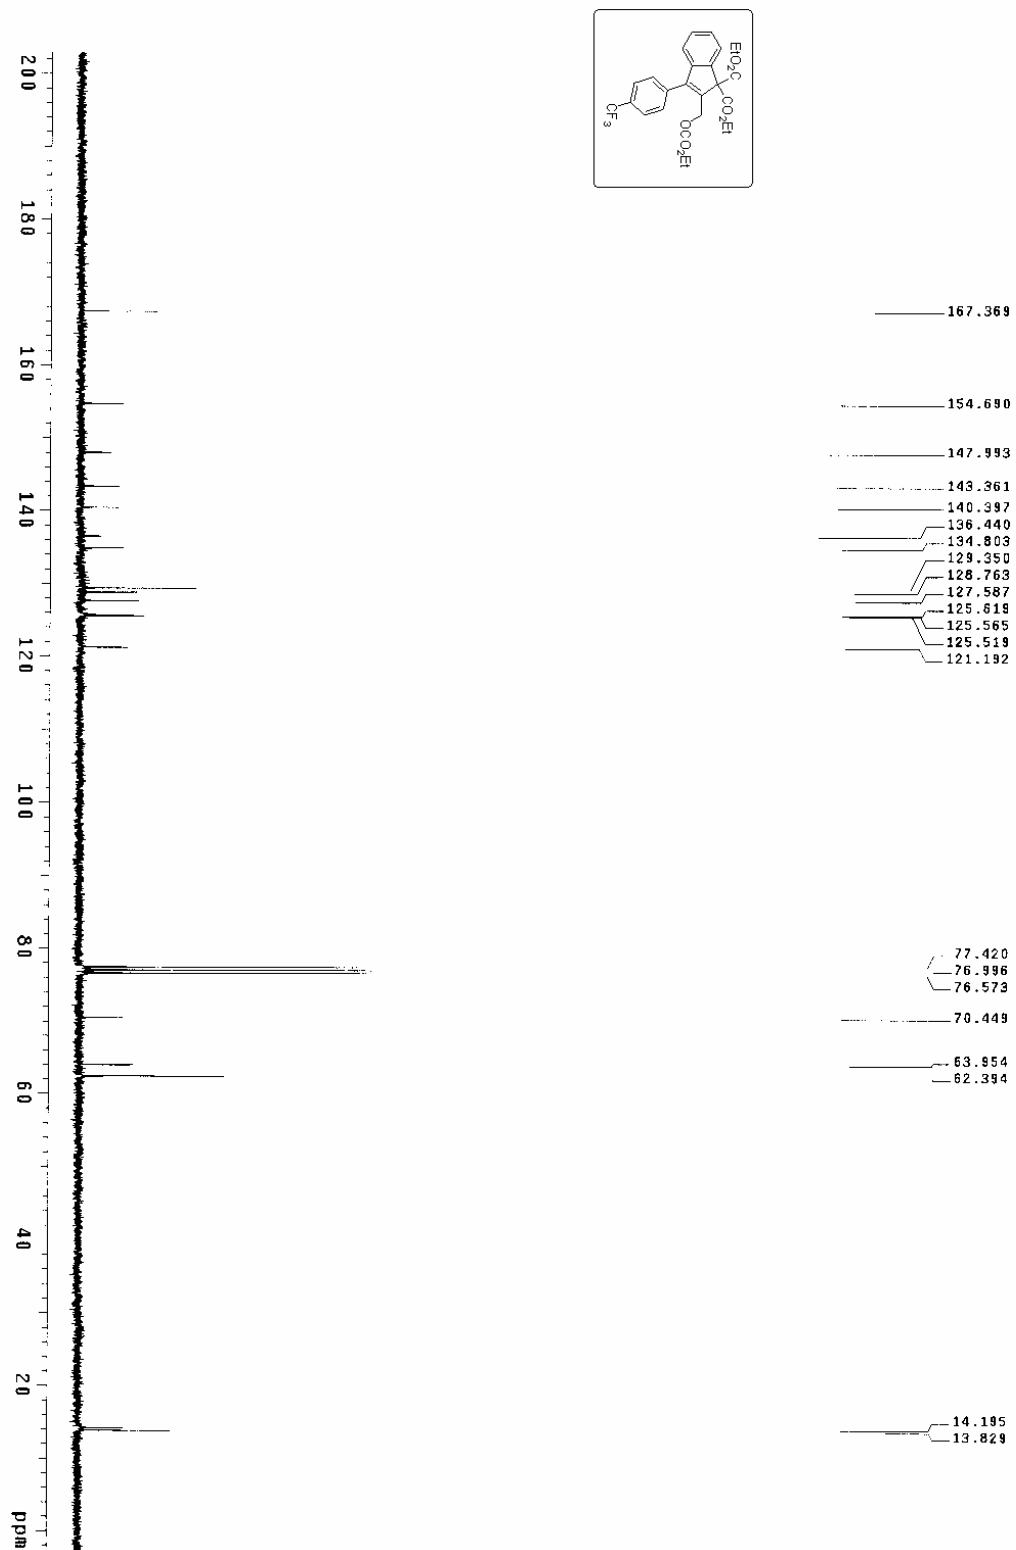



3h

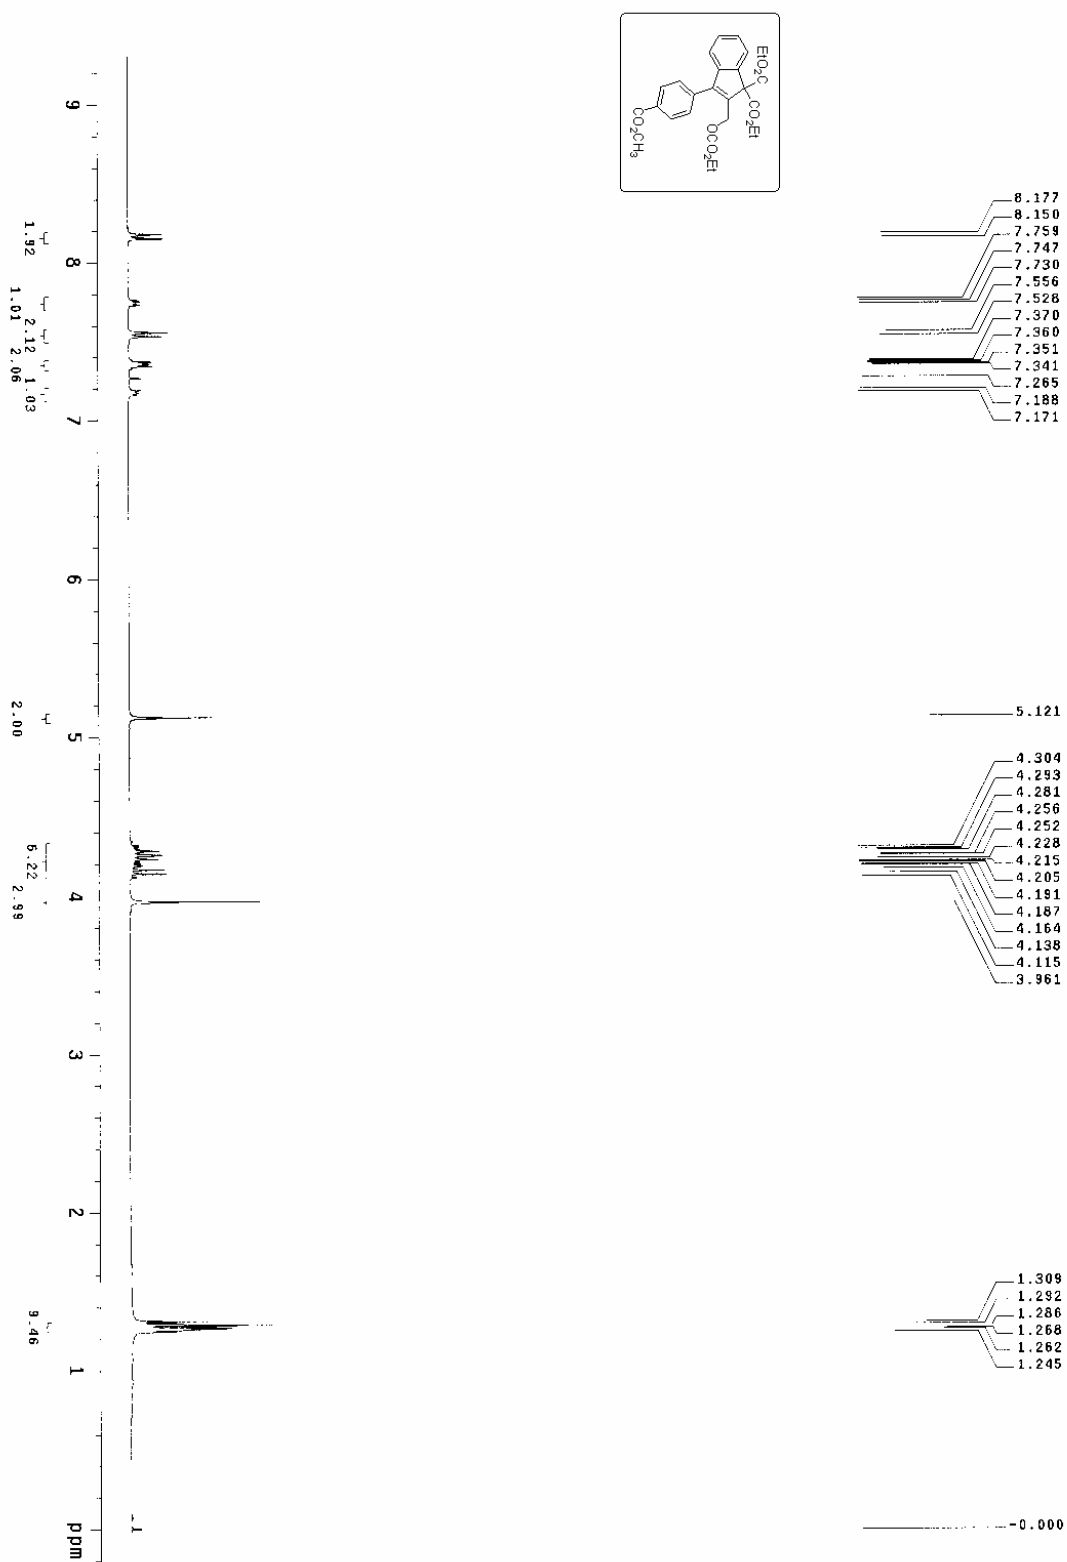

3h

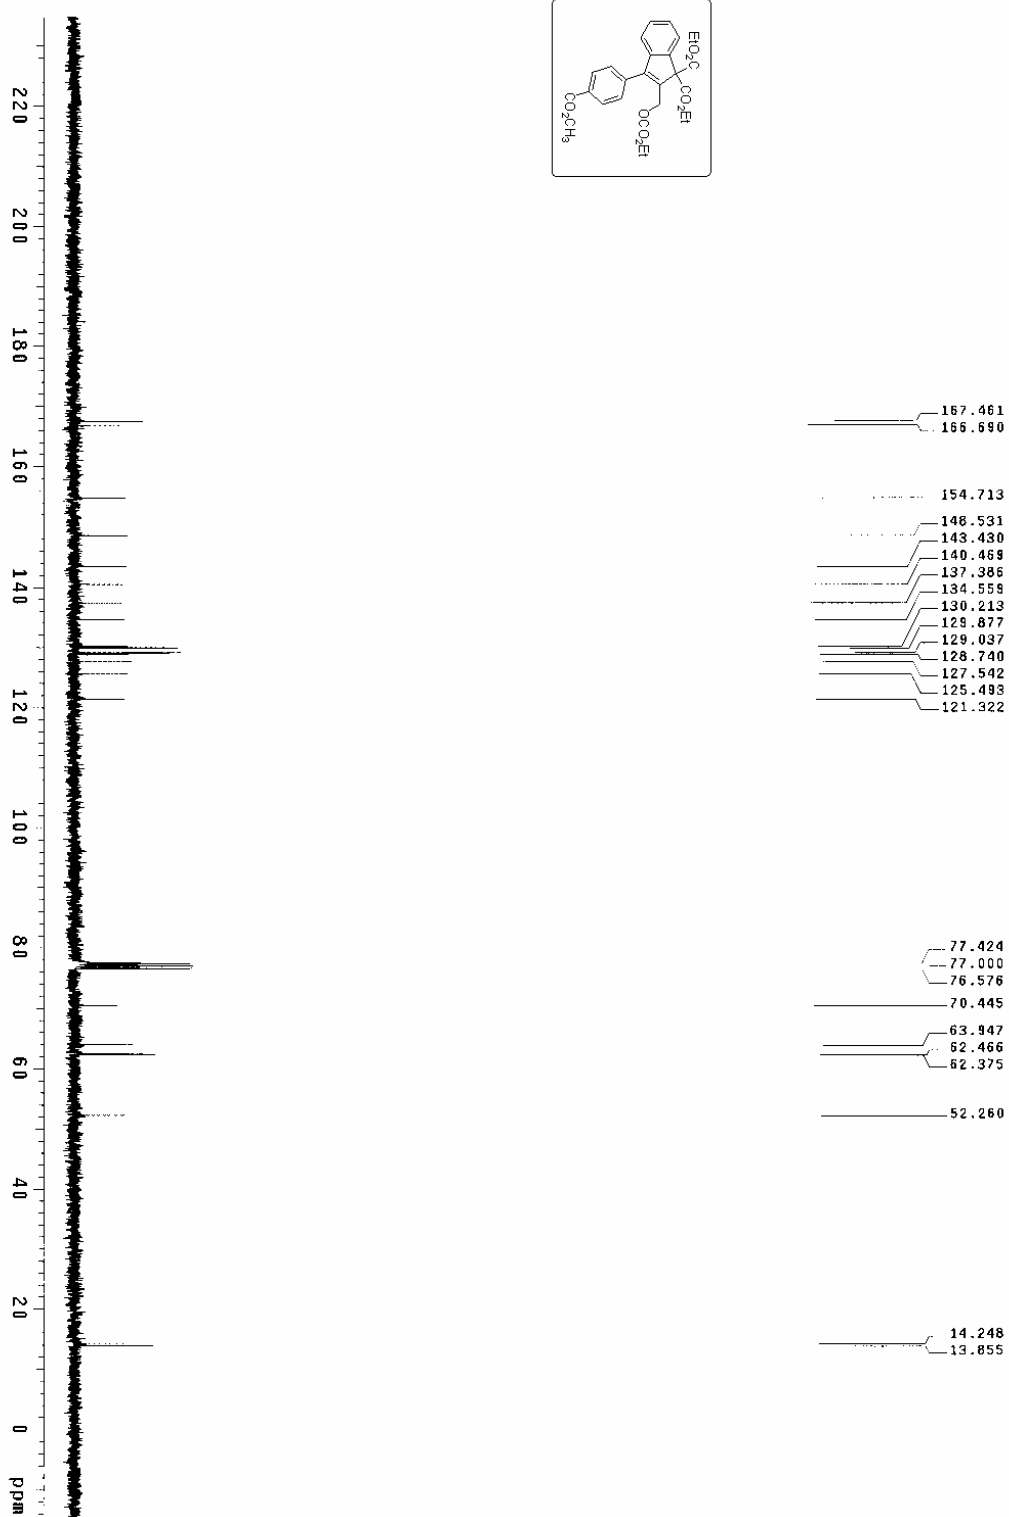

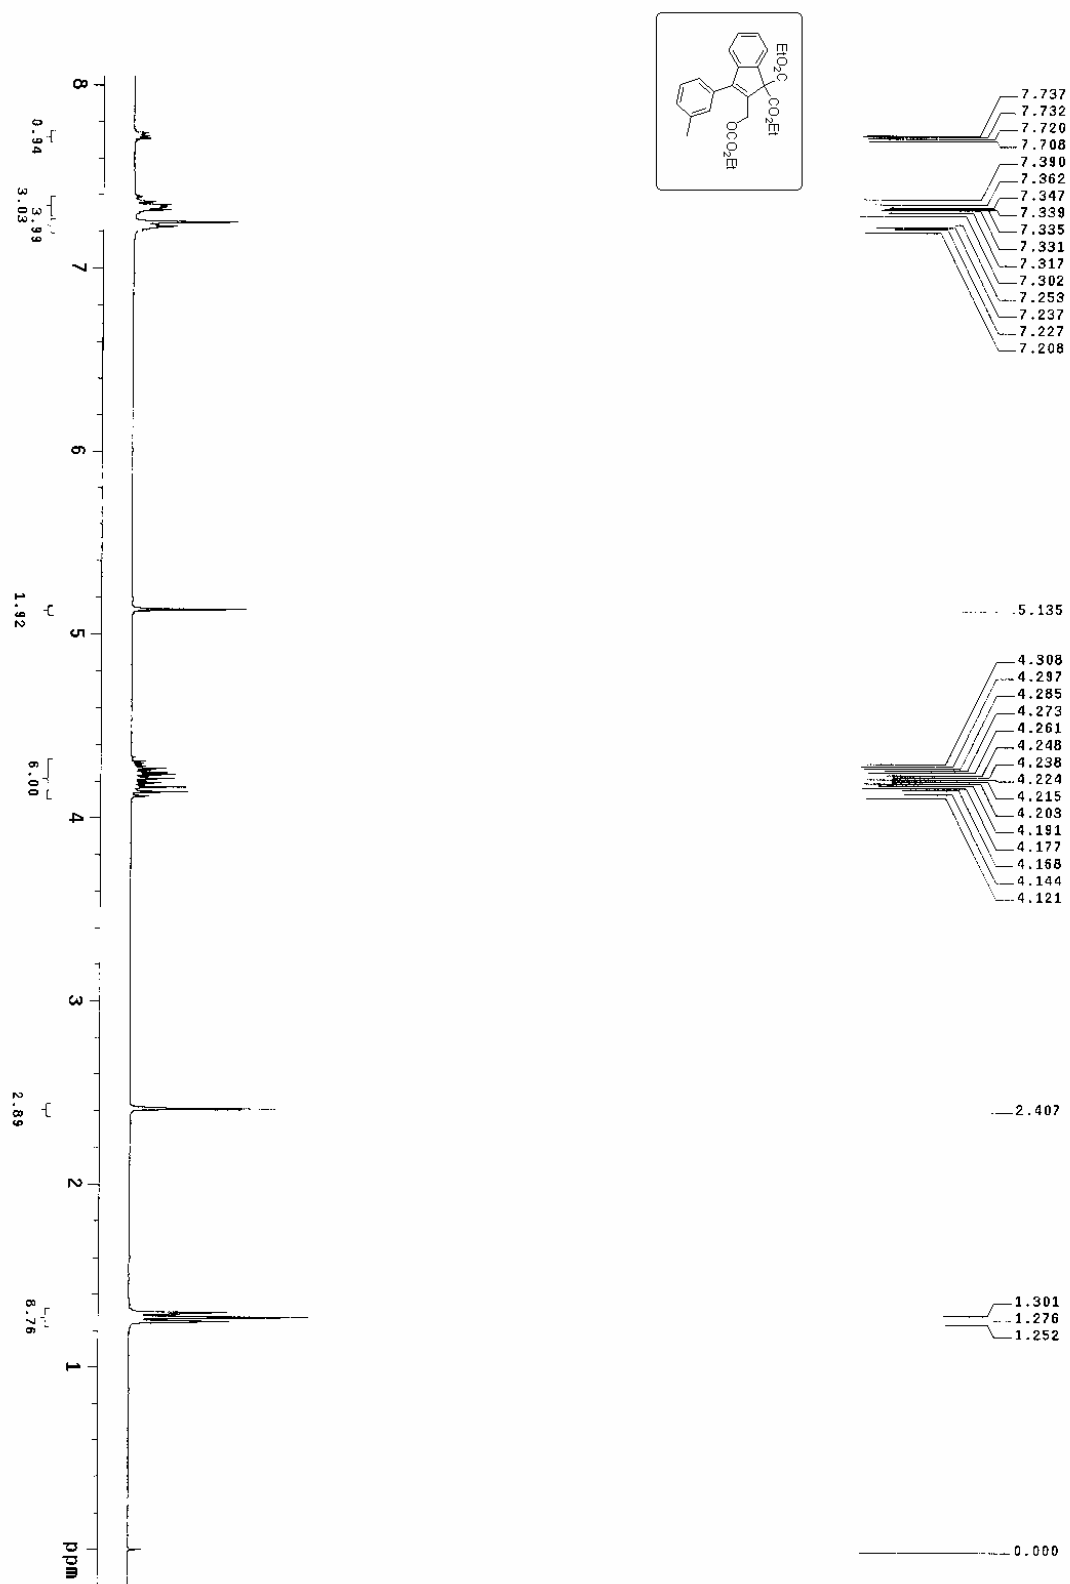

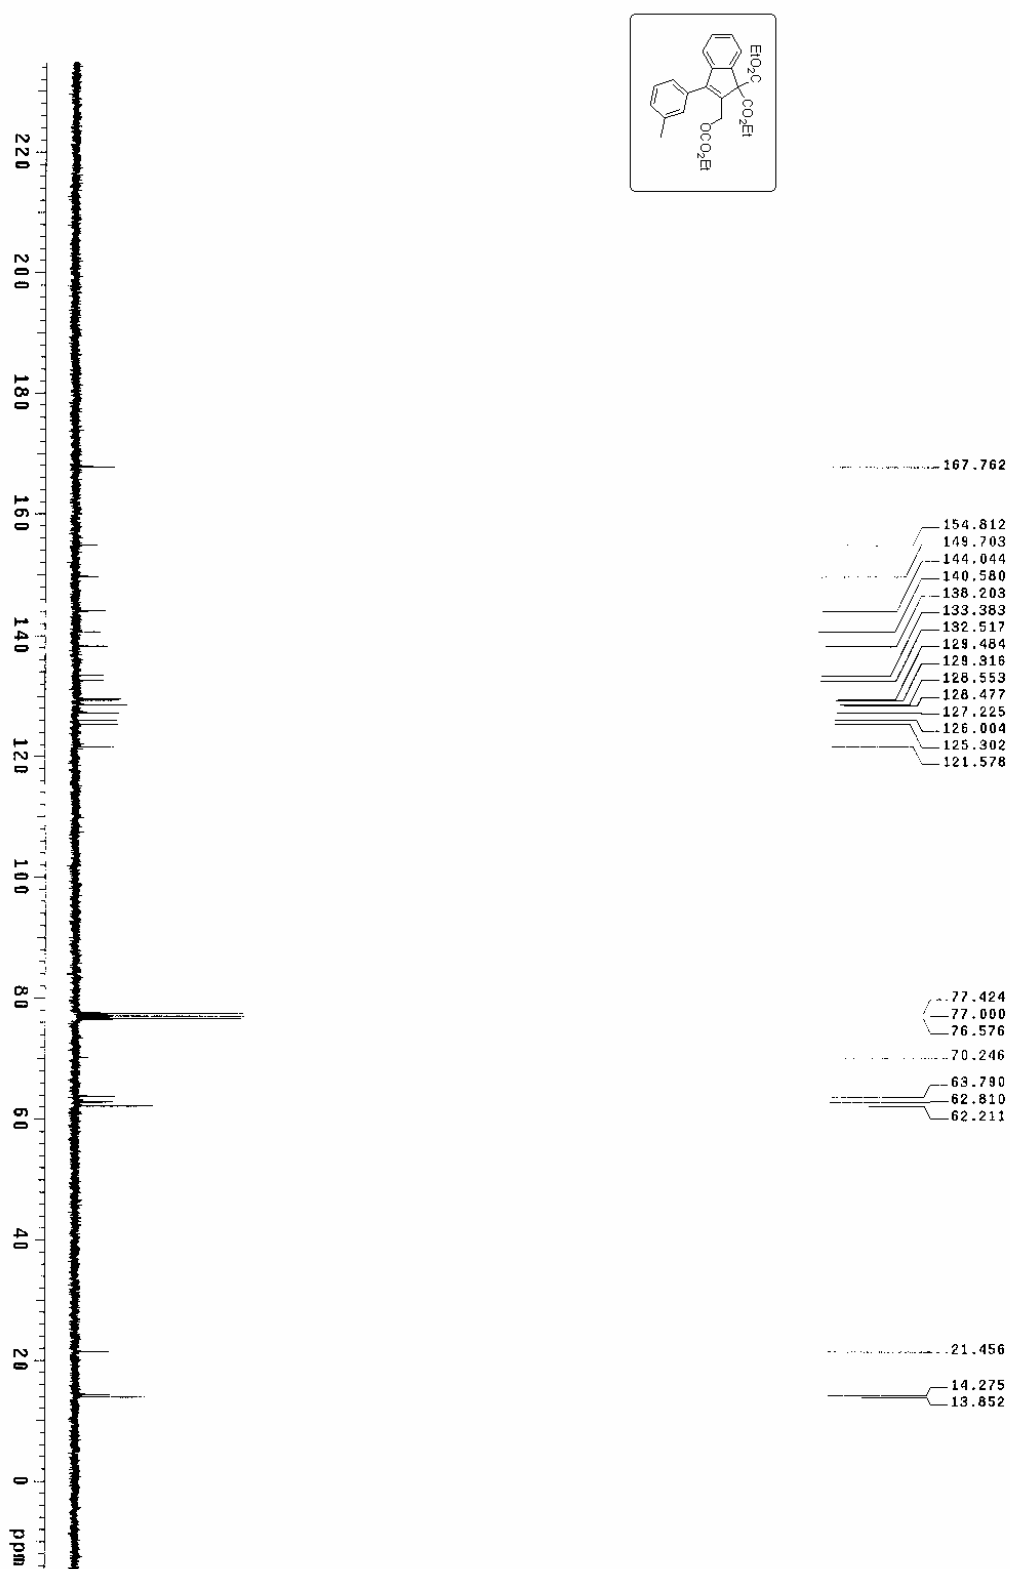

3j

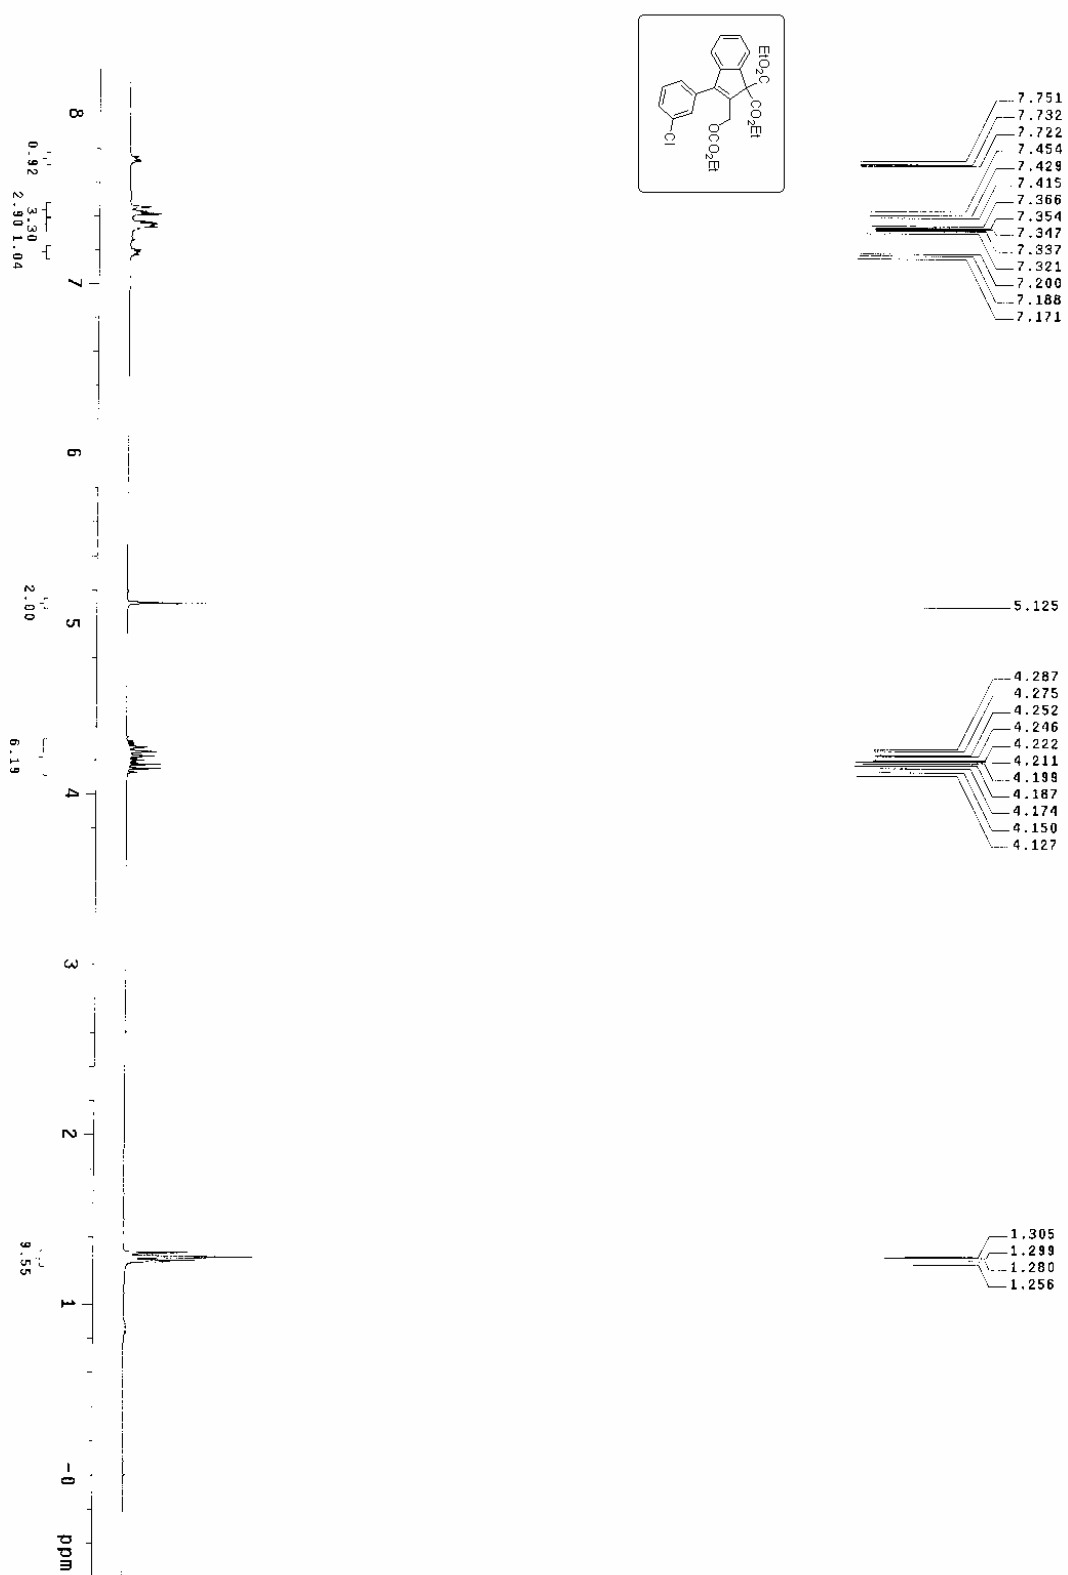

3j

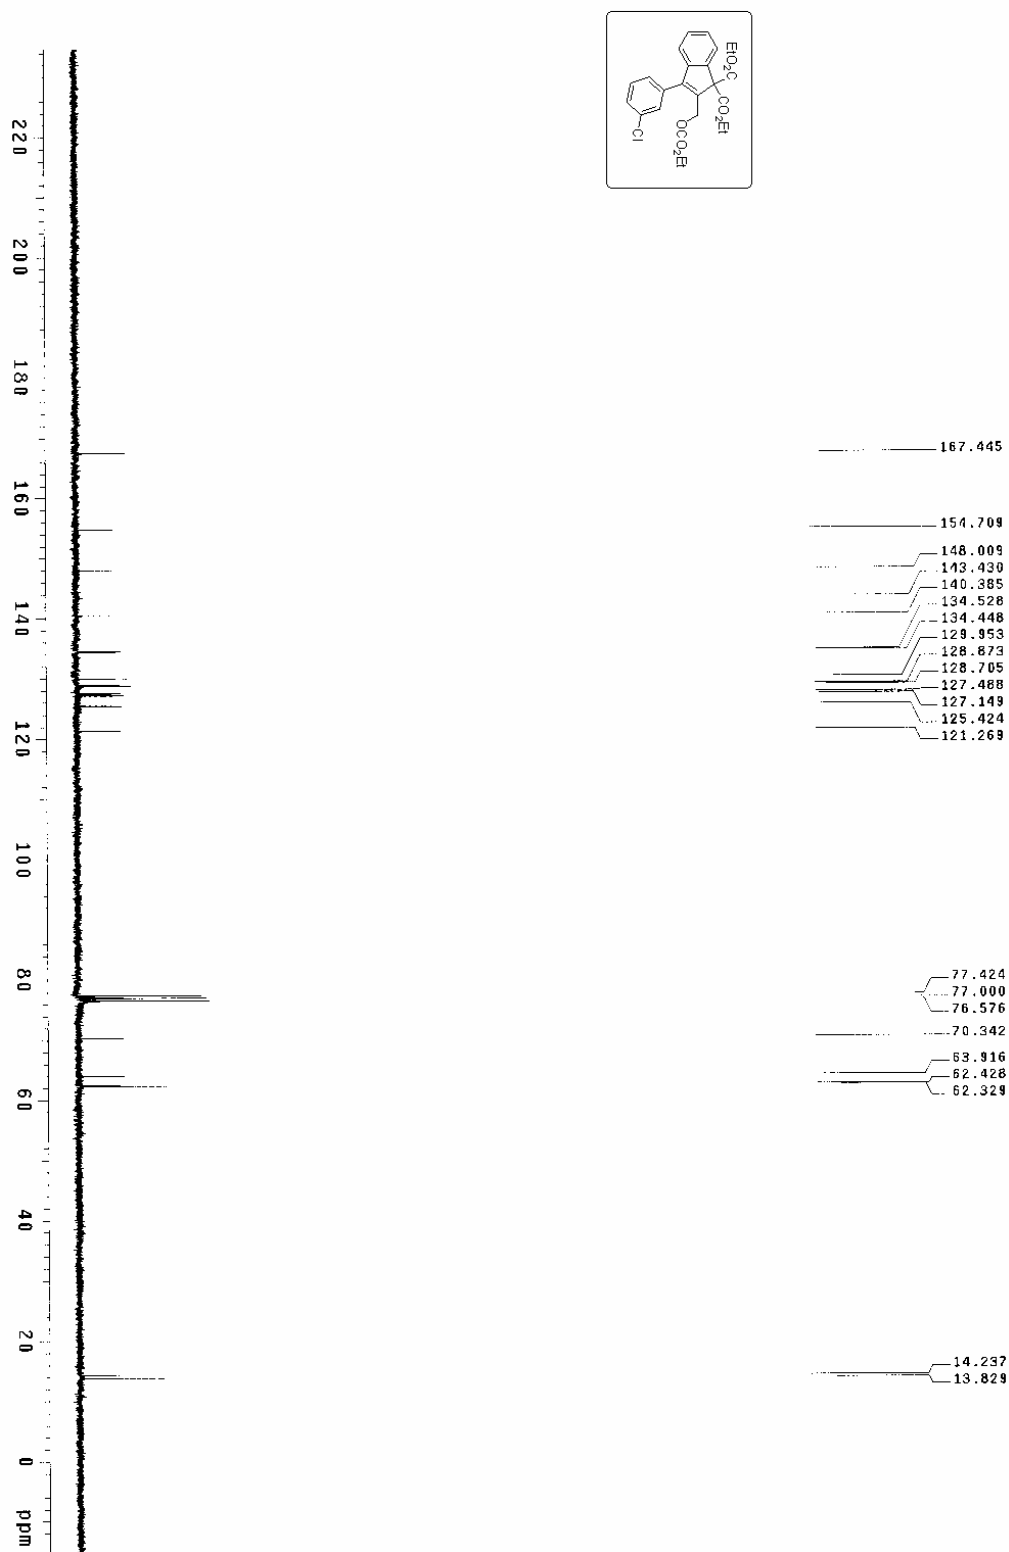

3k

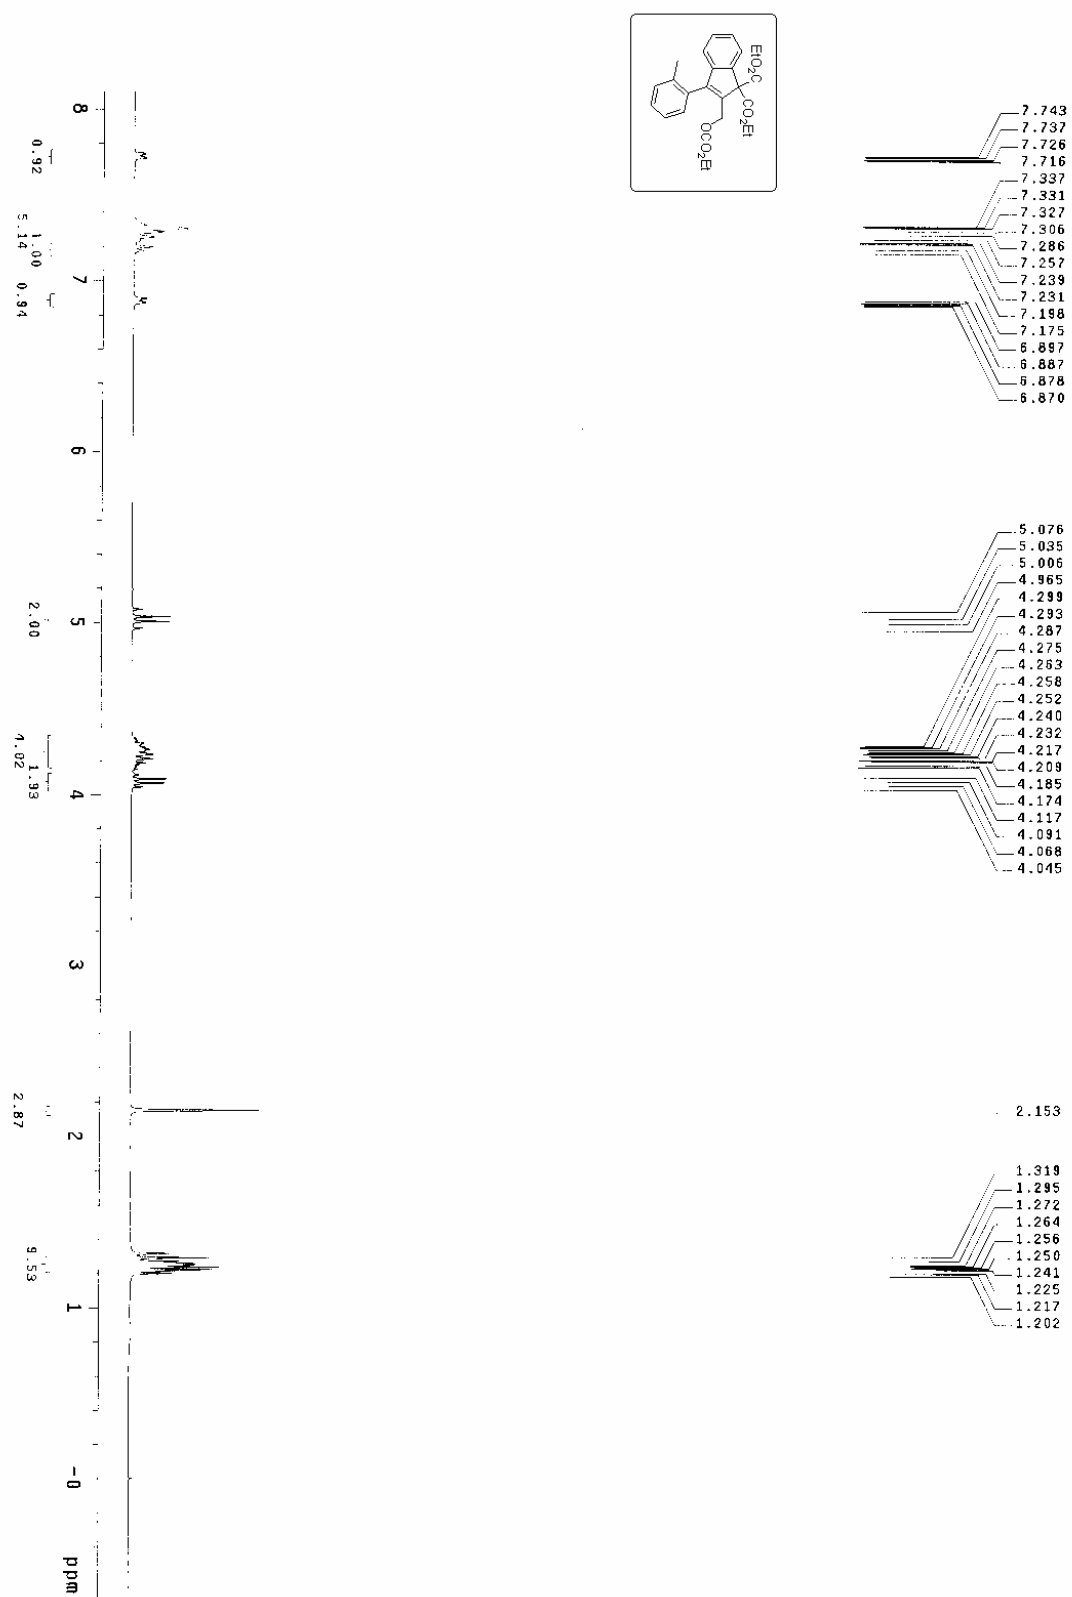

3k

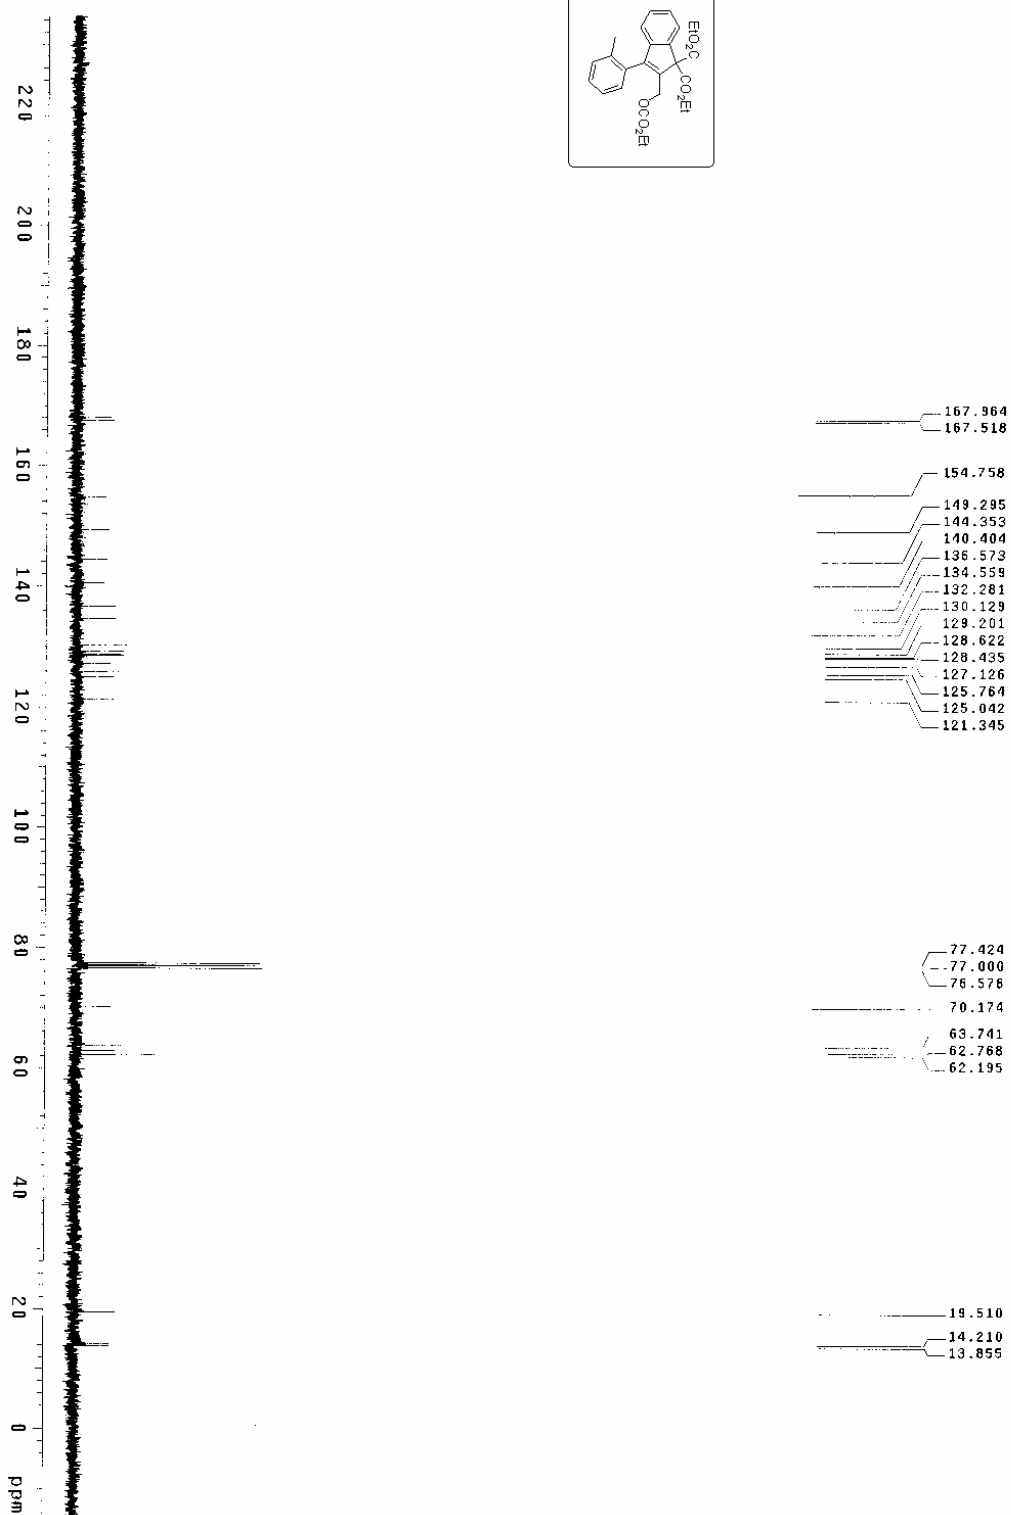



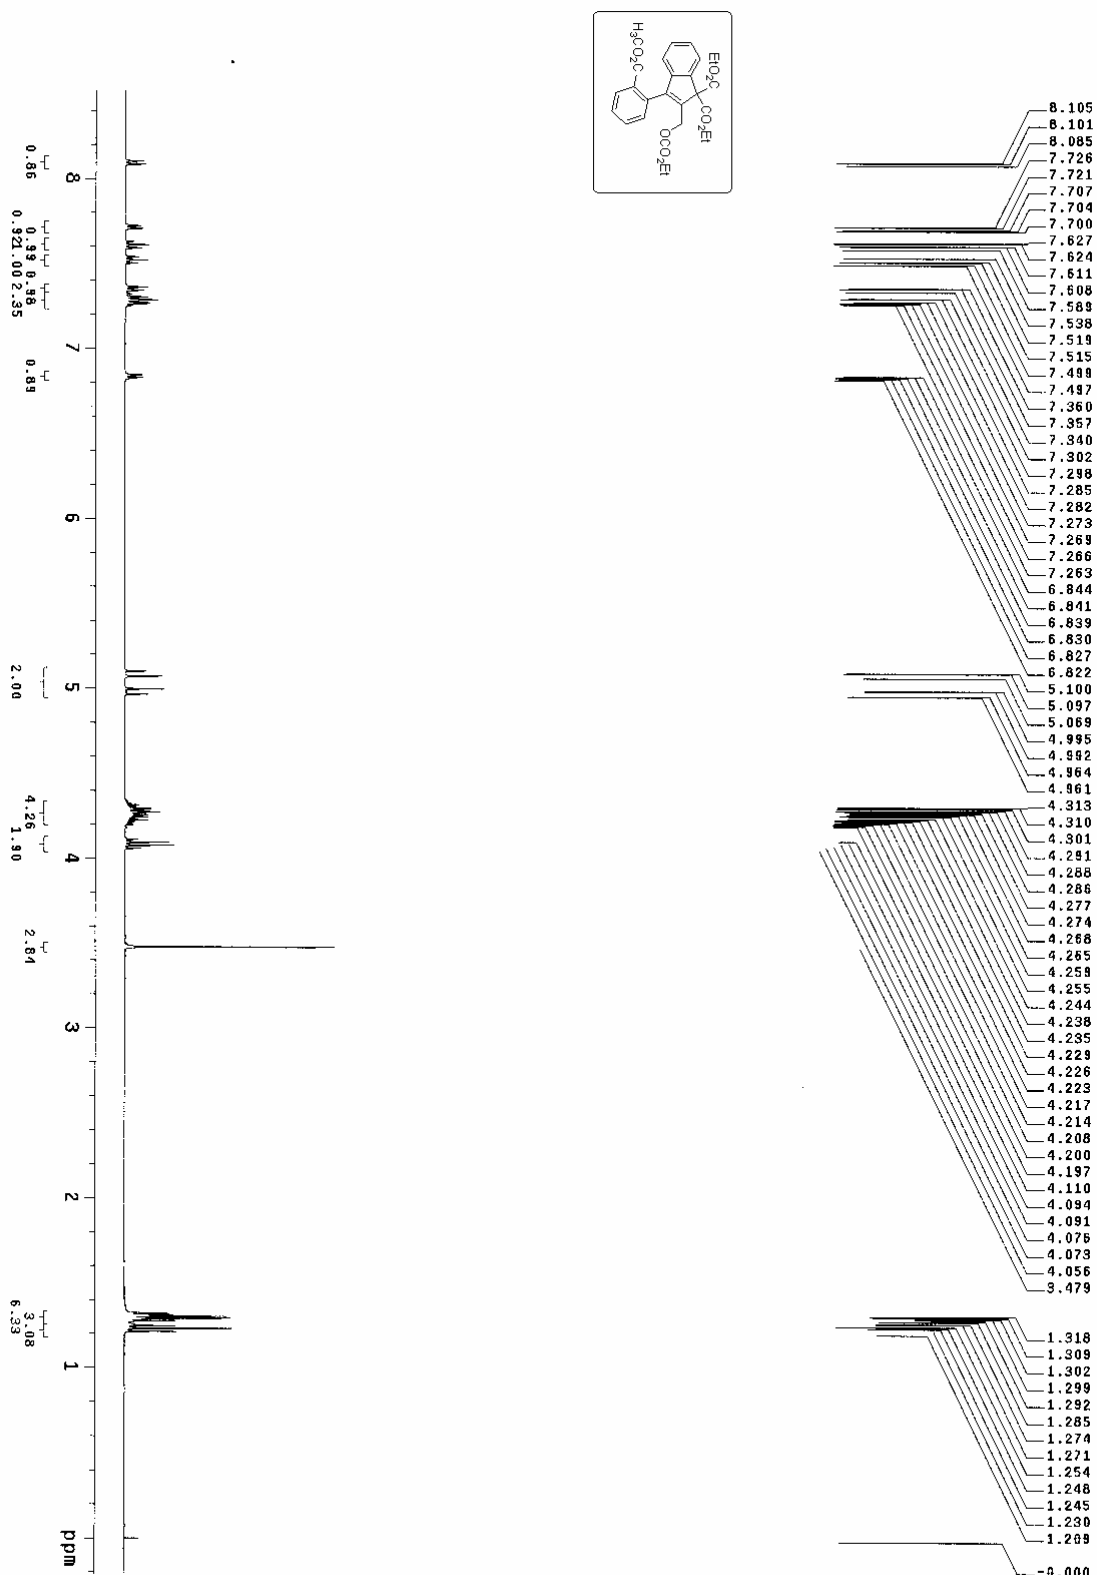

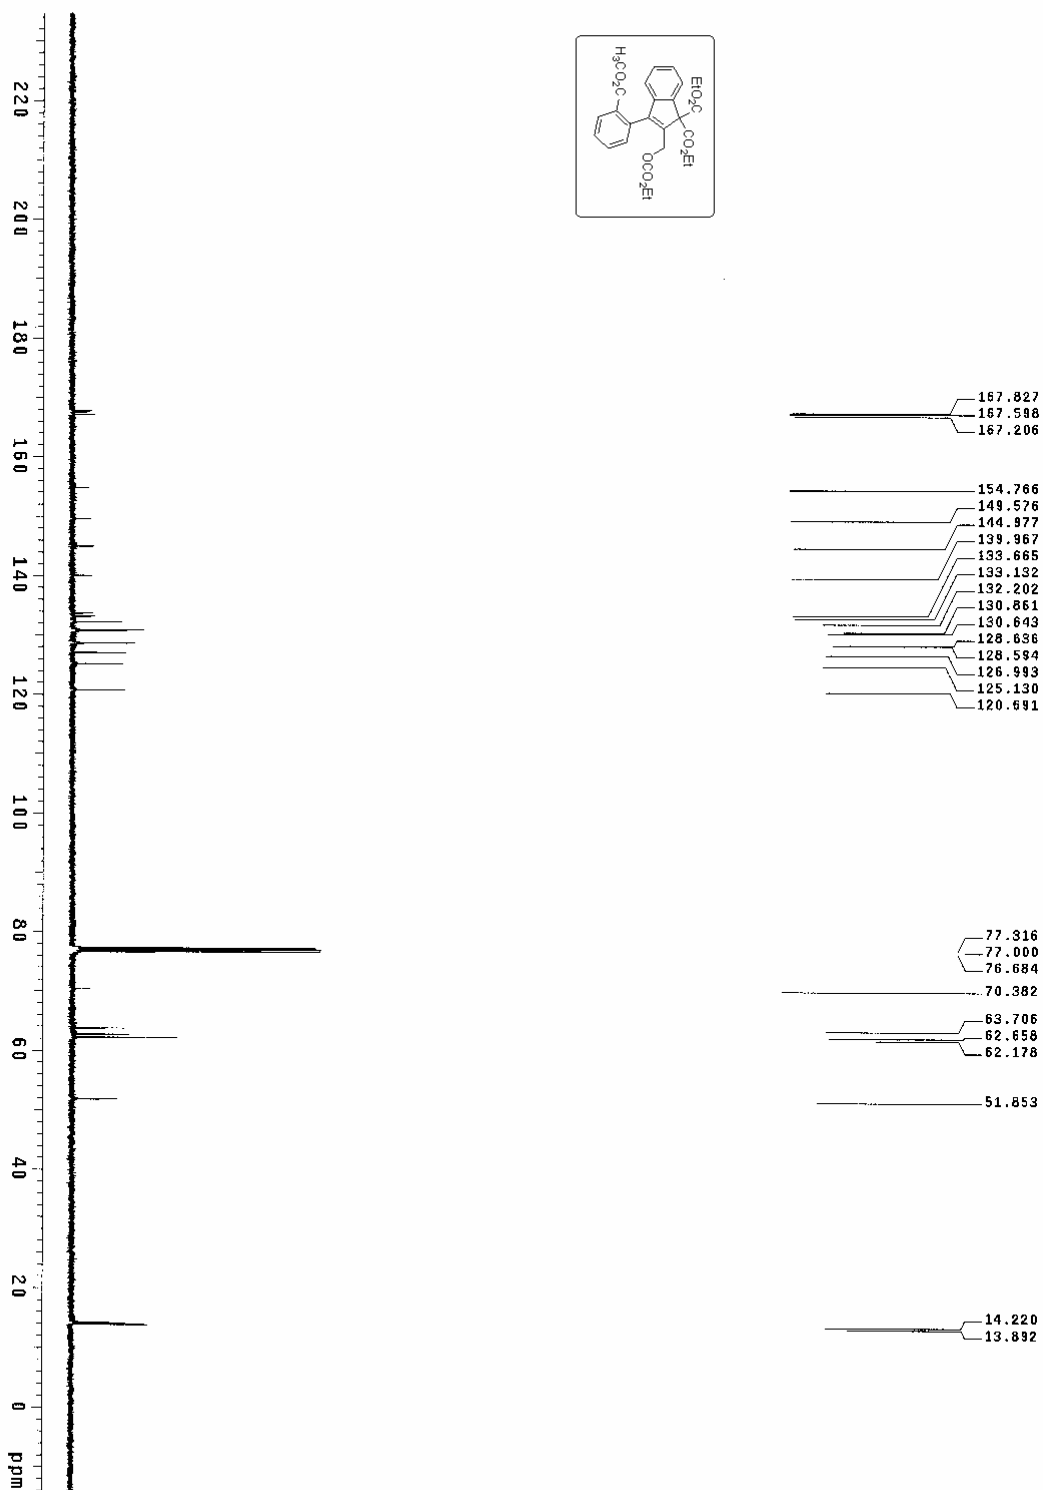

3m

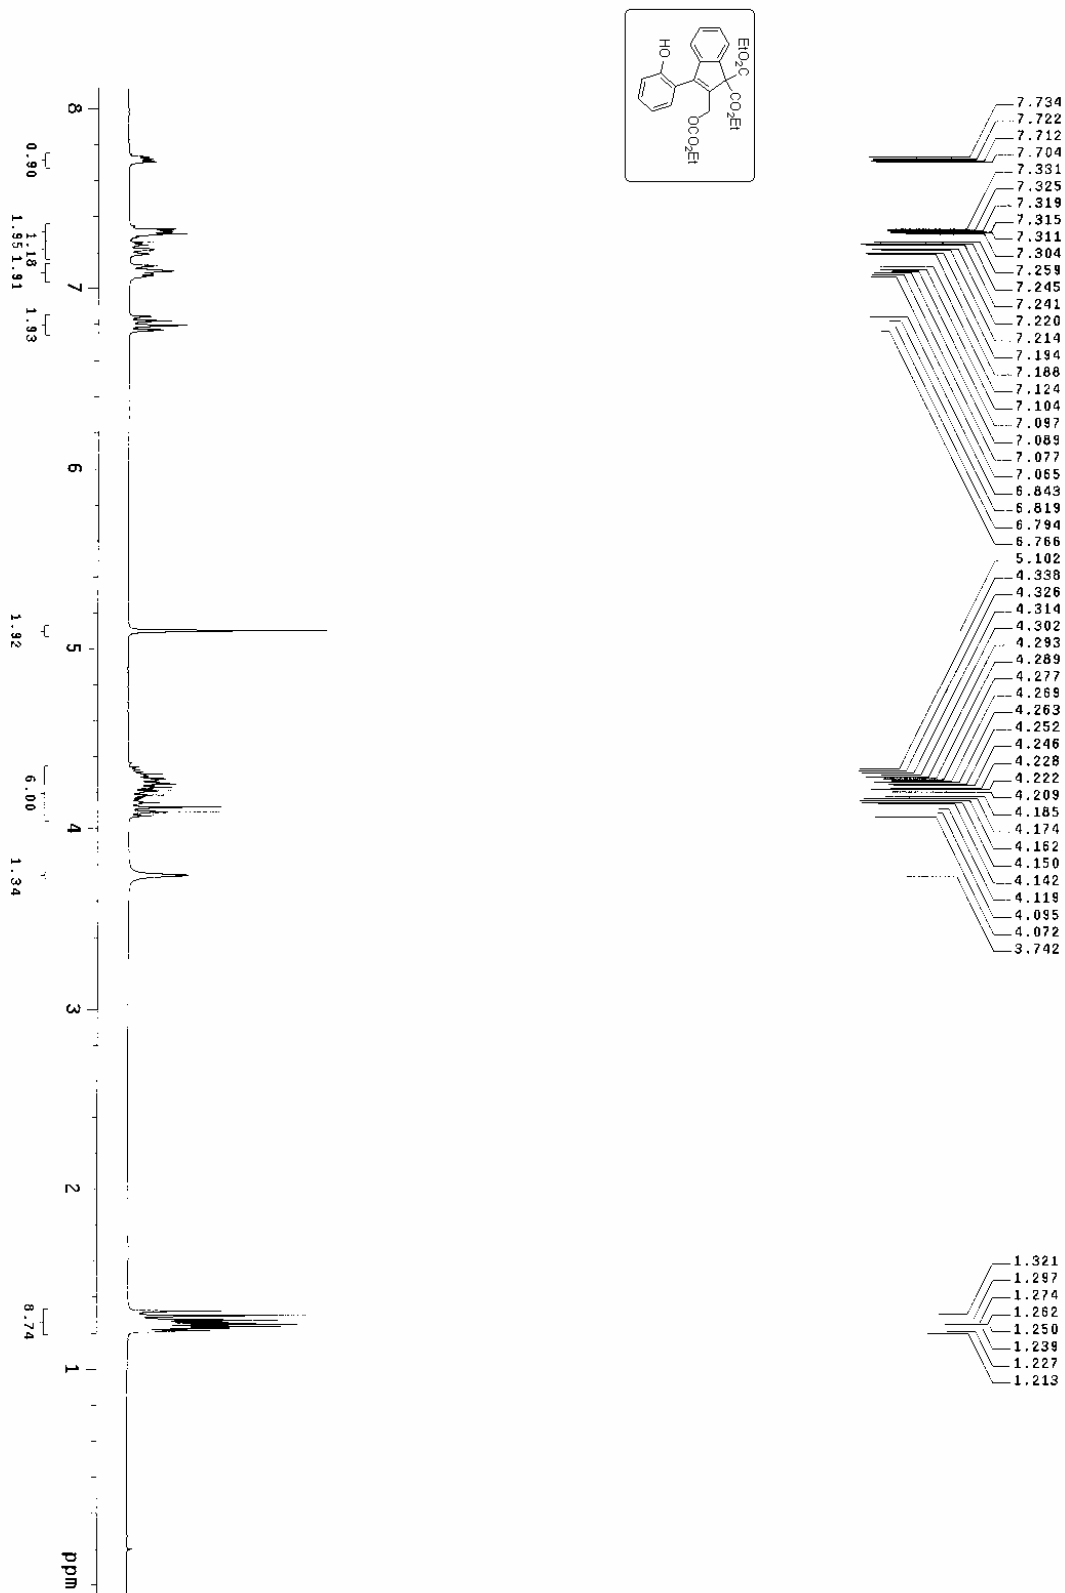

3m

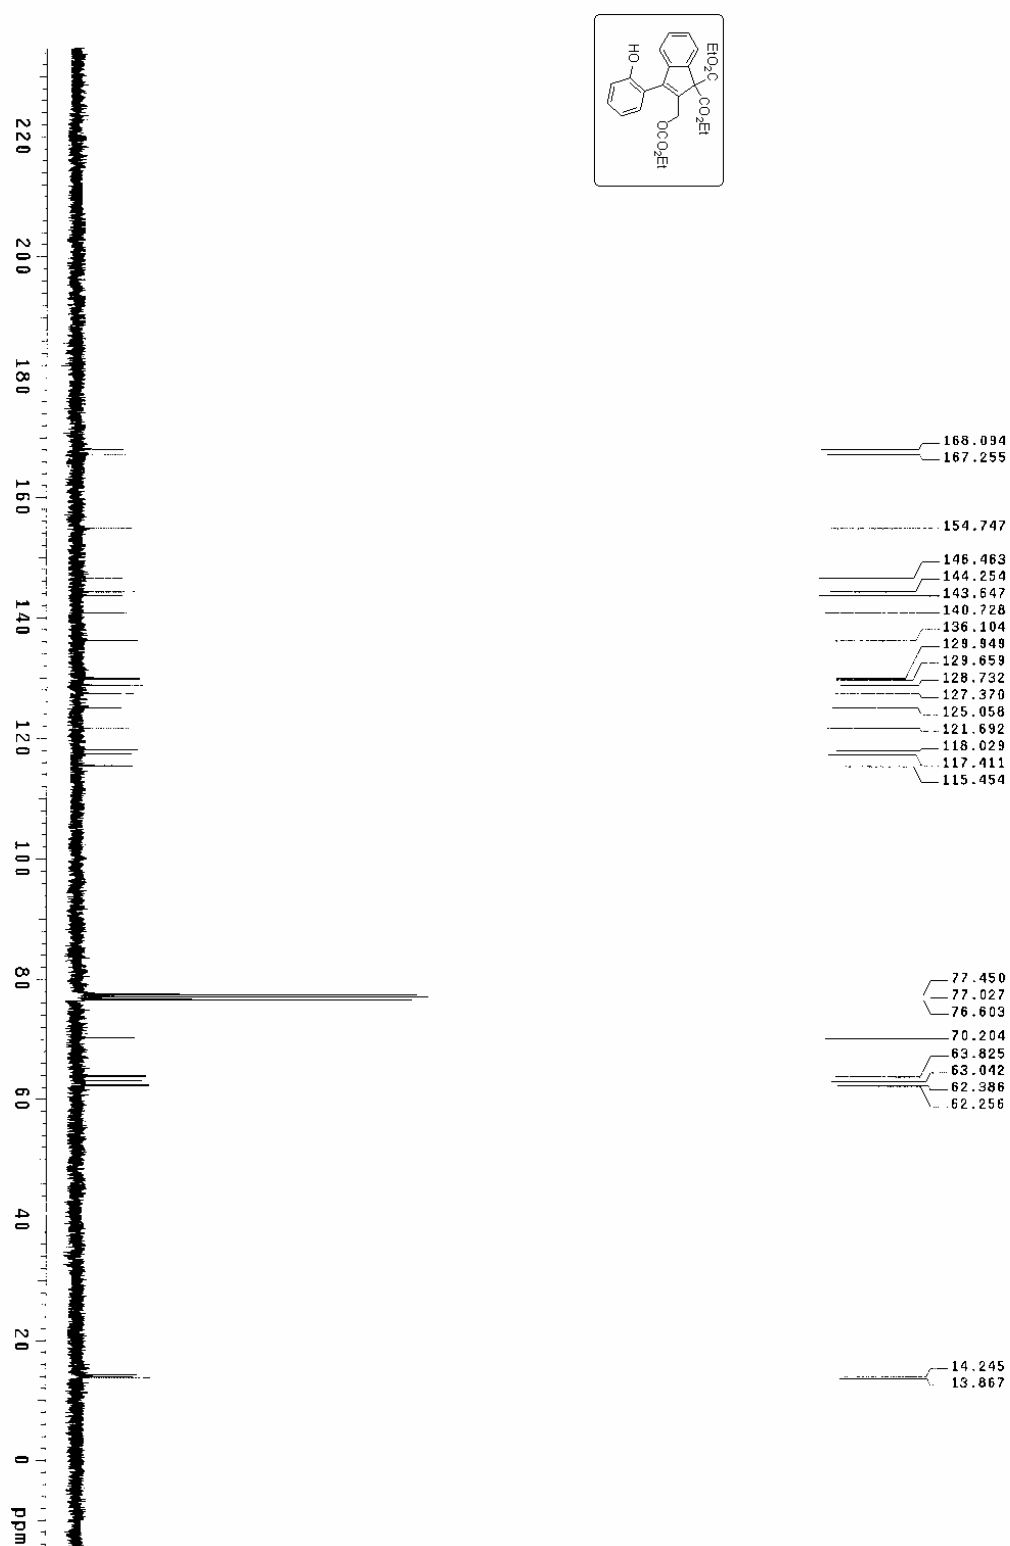

3n

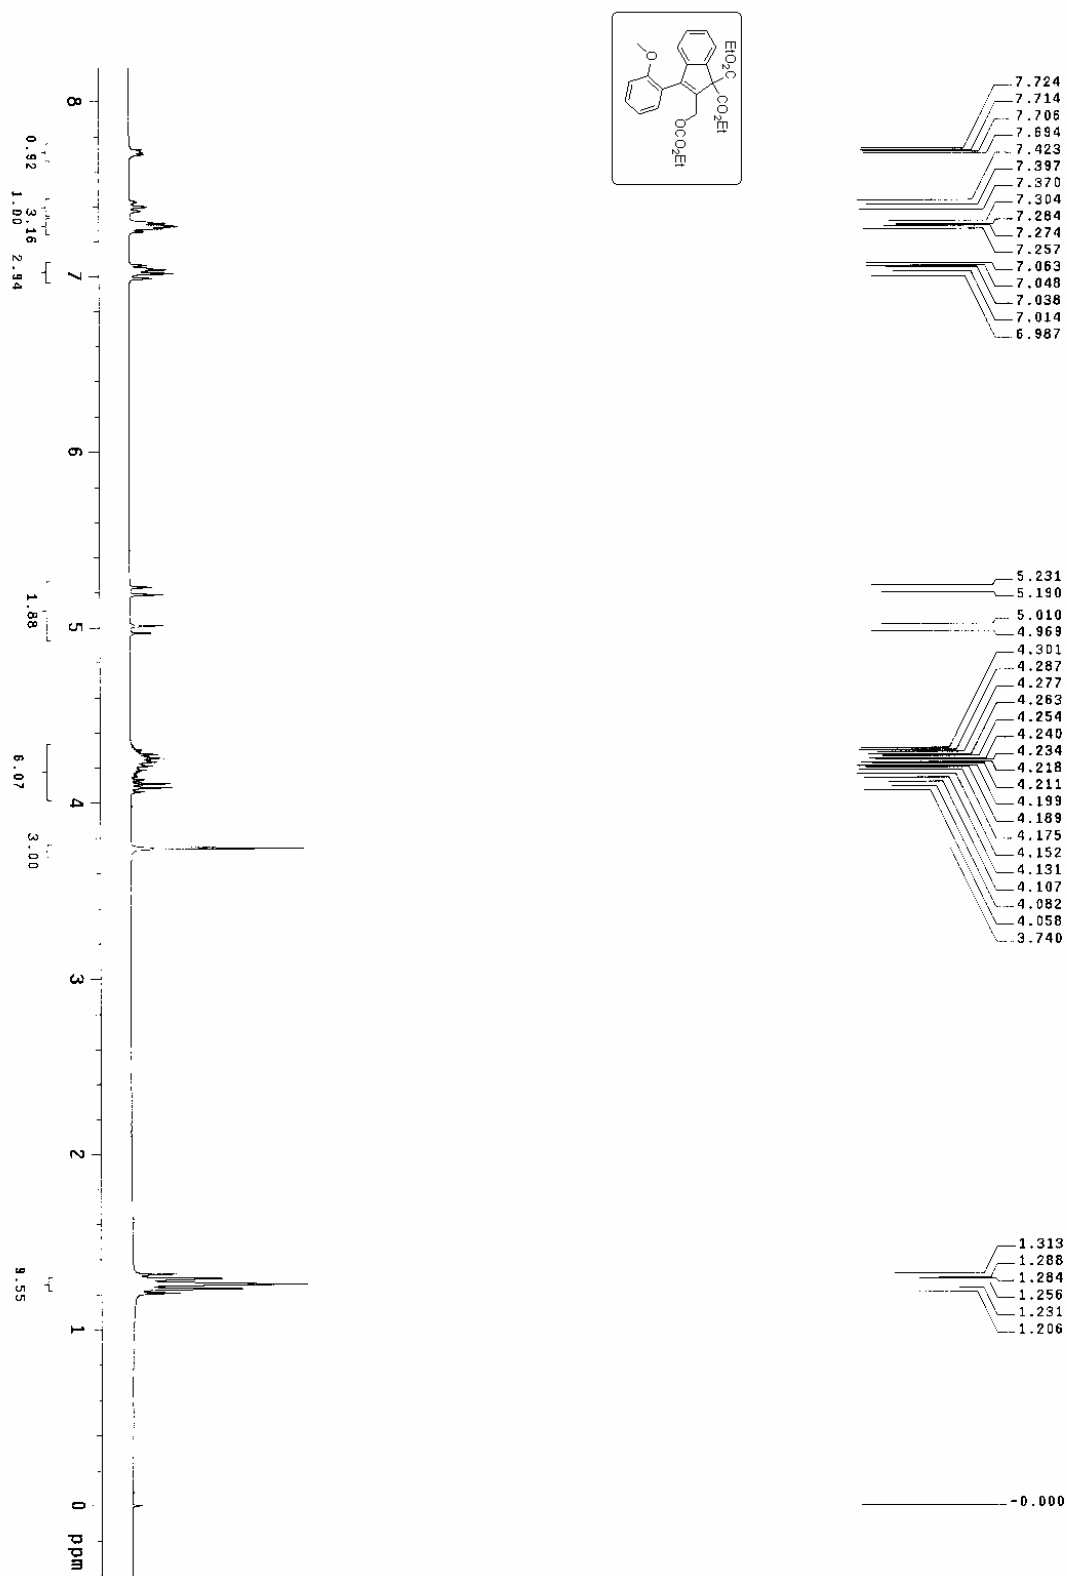

3n

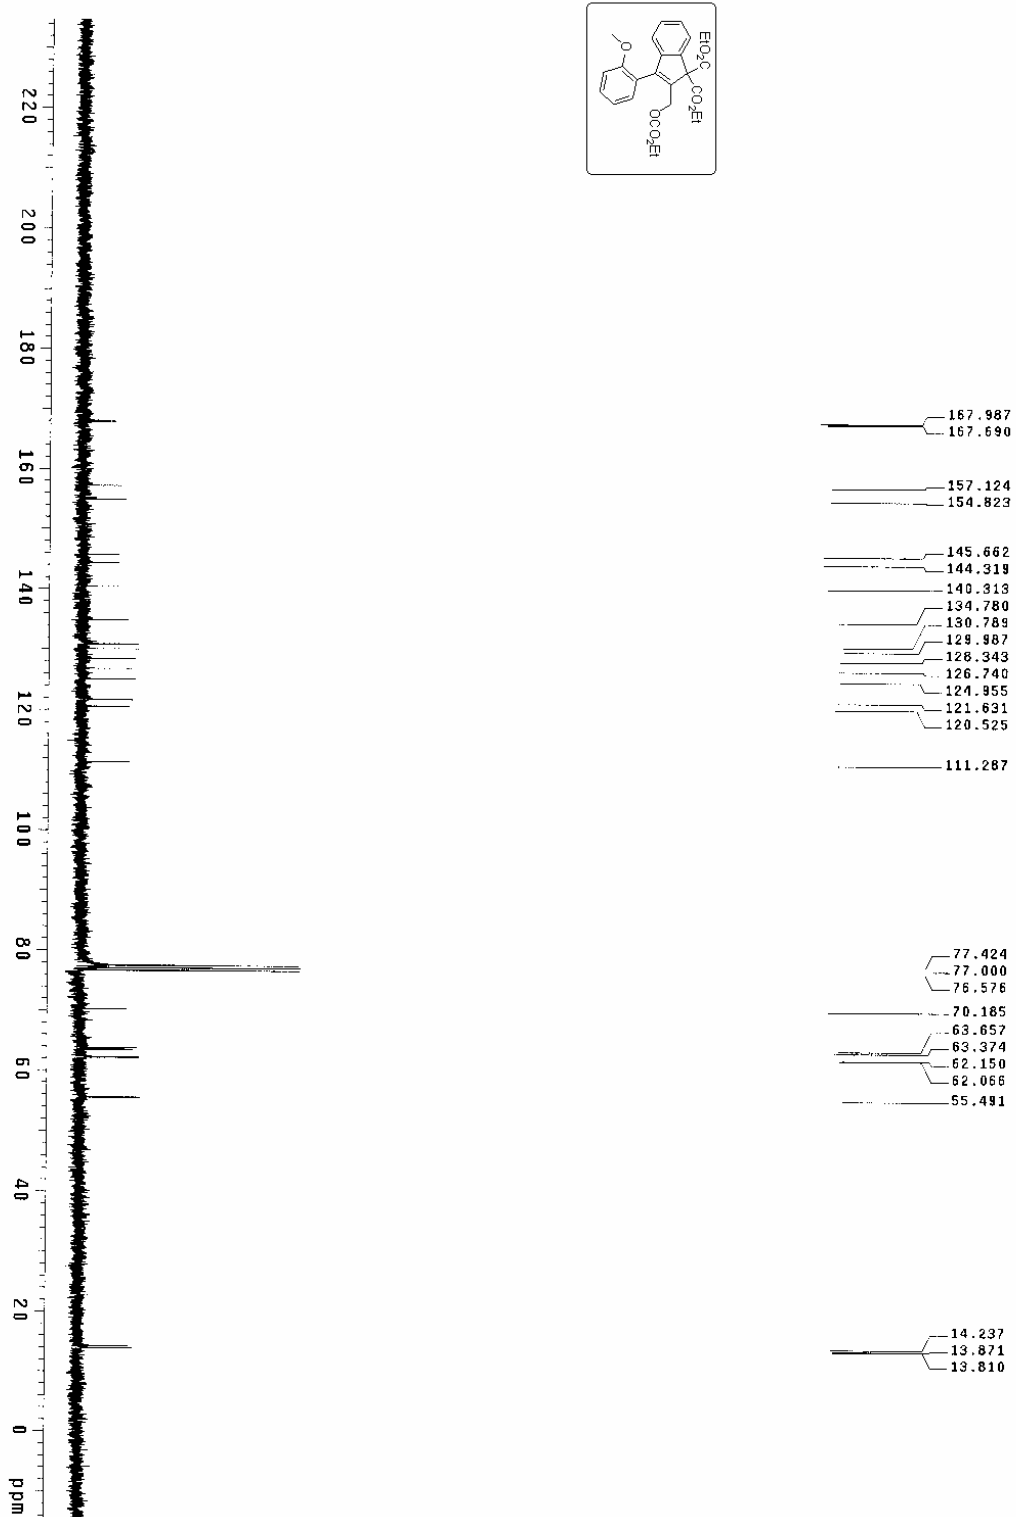

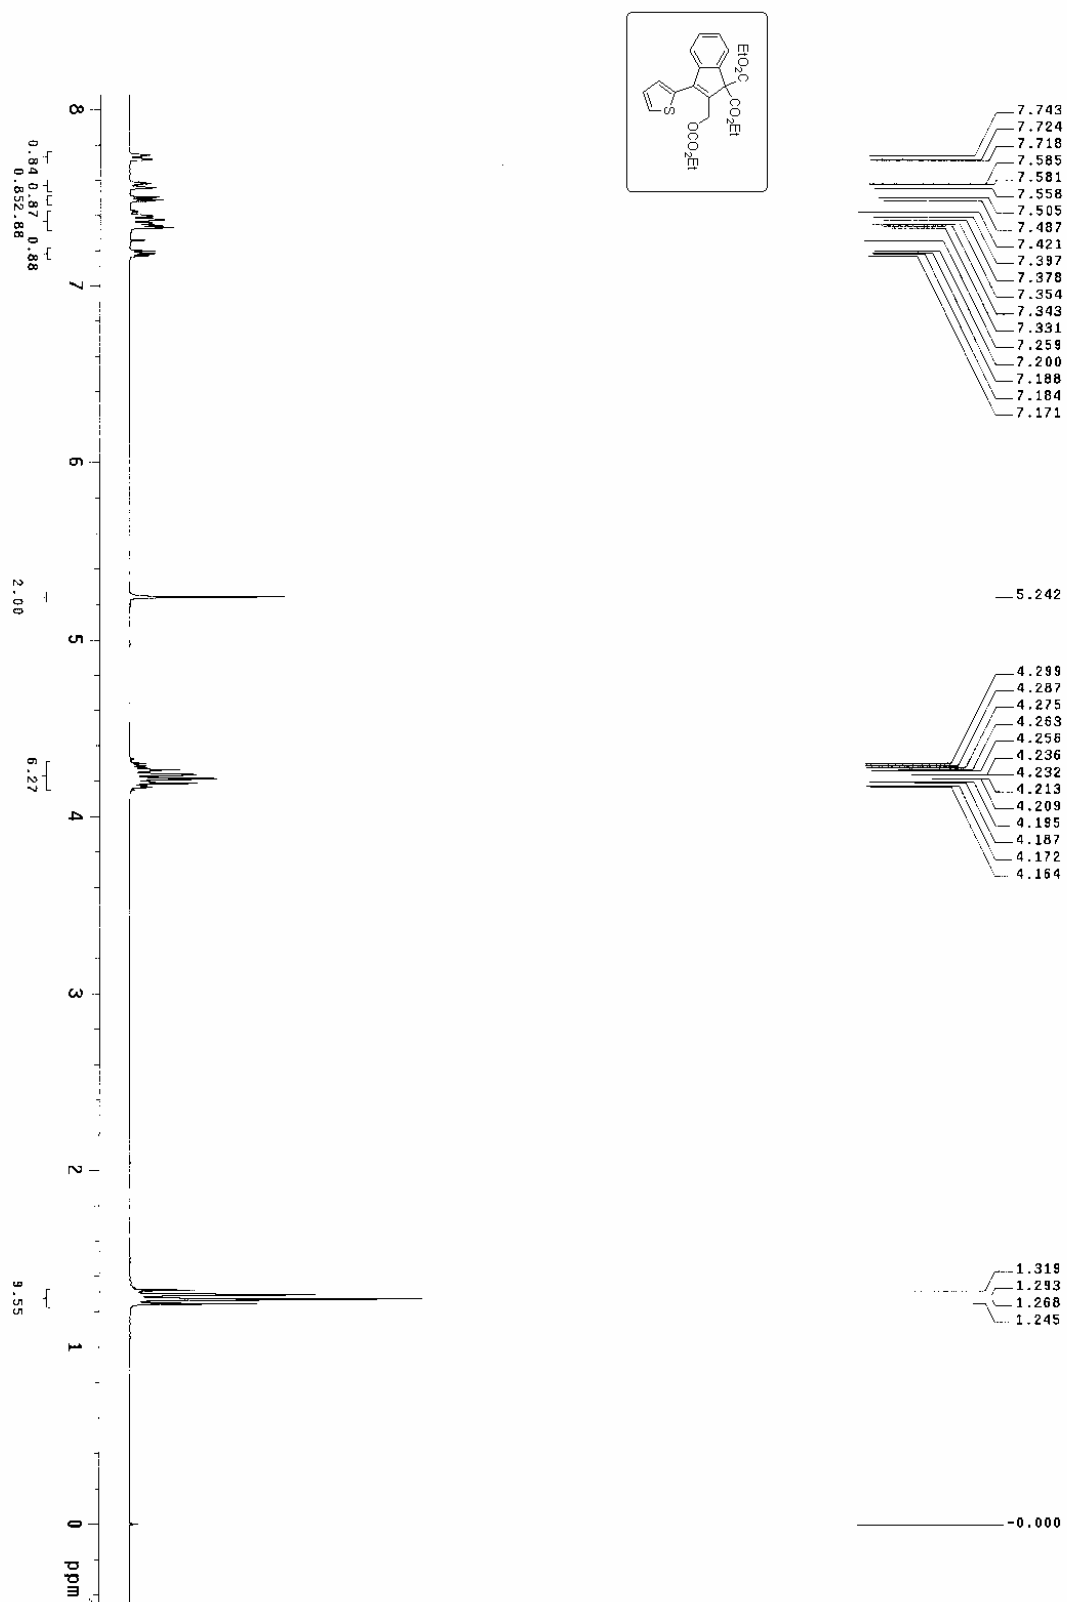

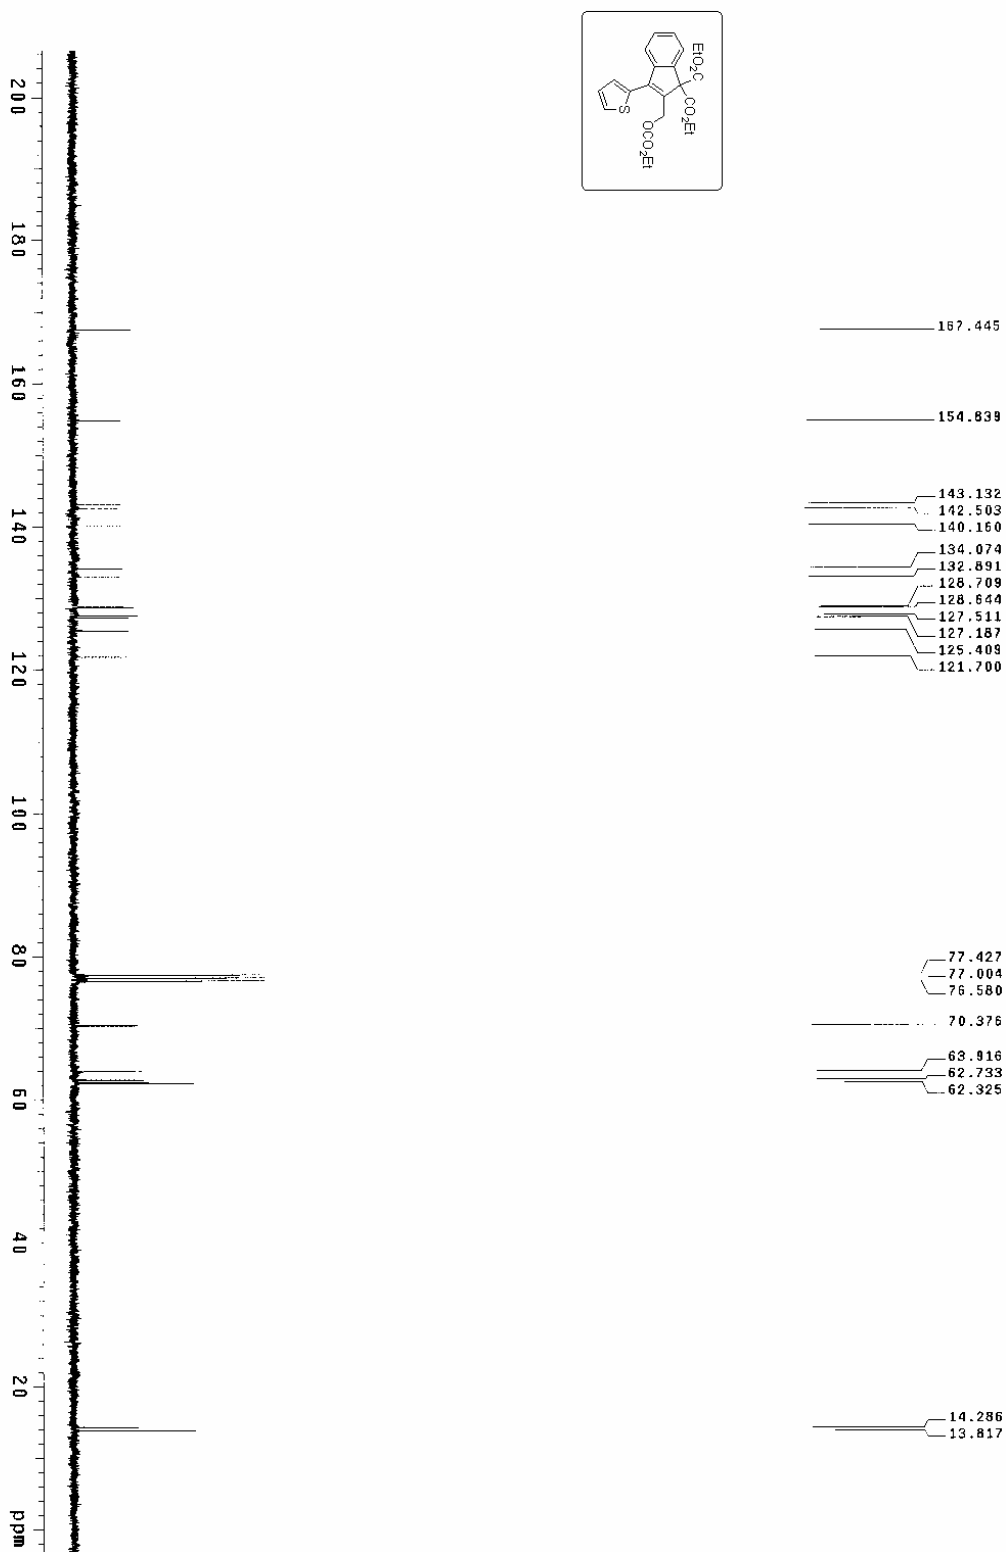



3p

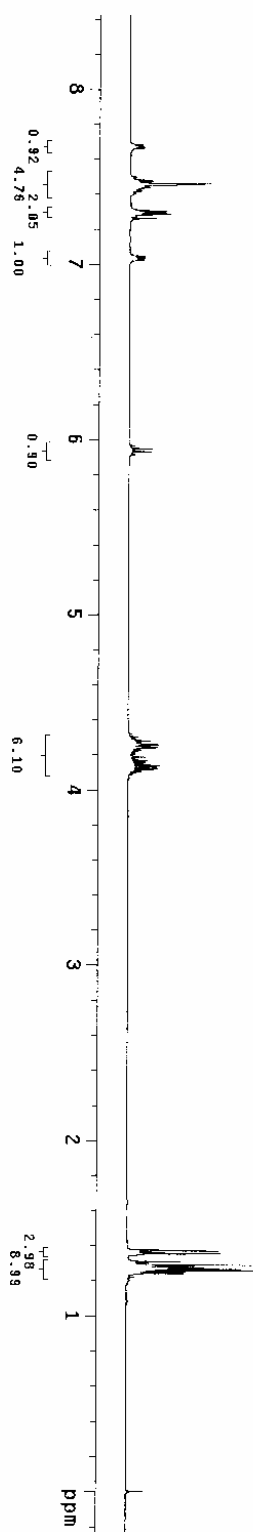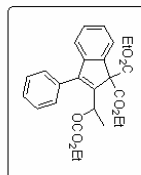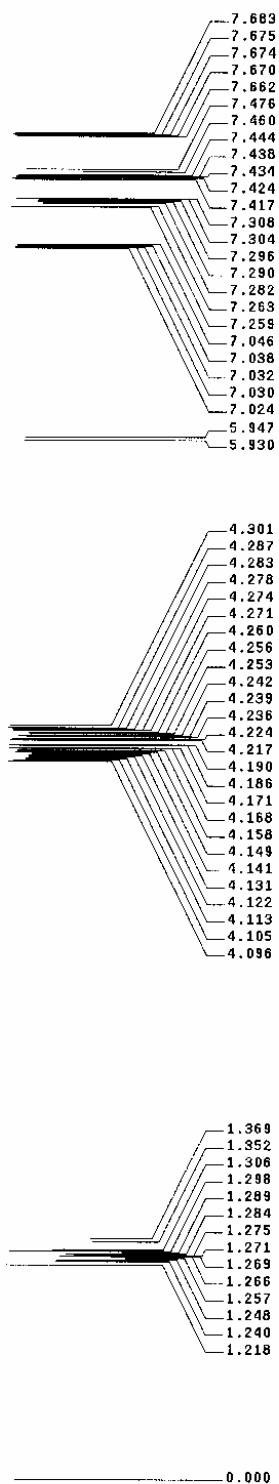

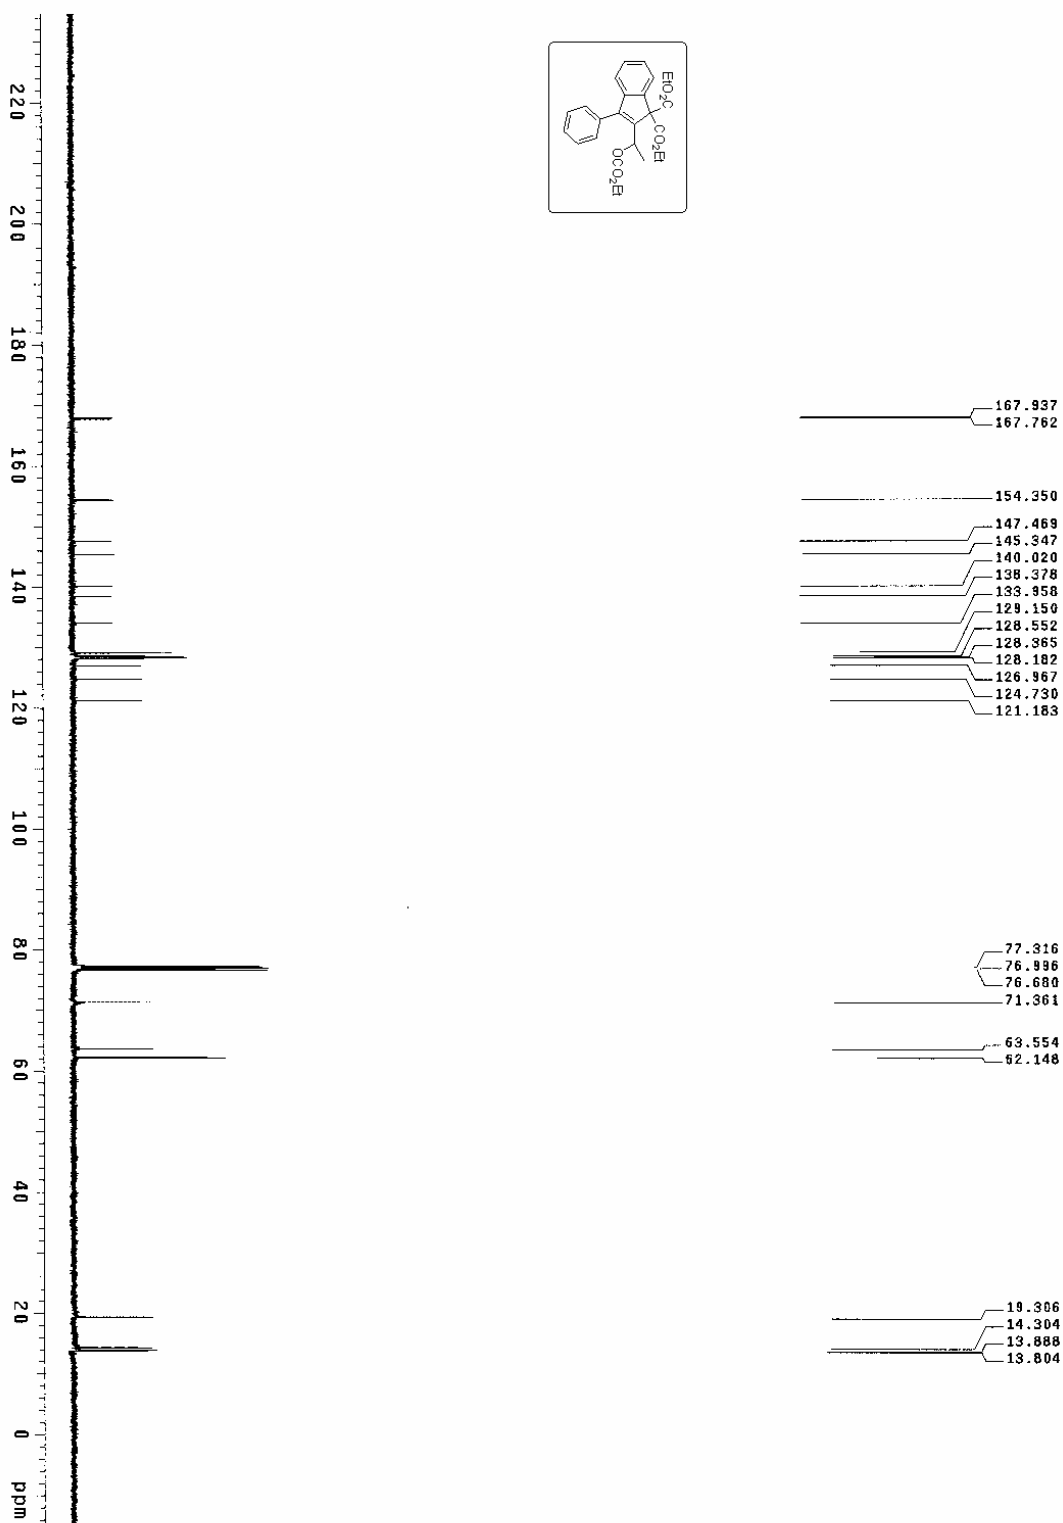

3q

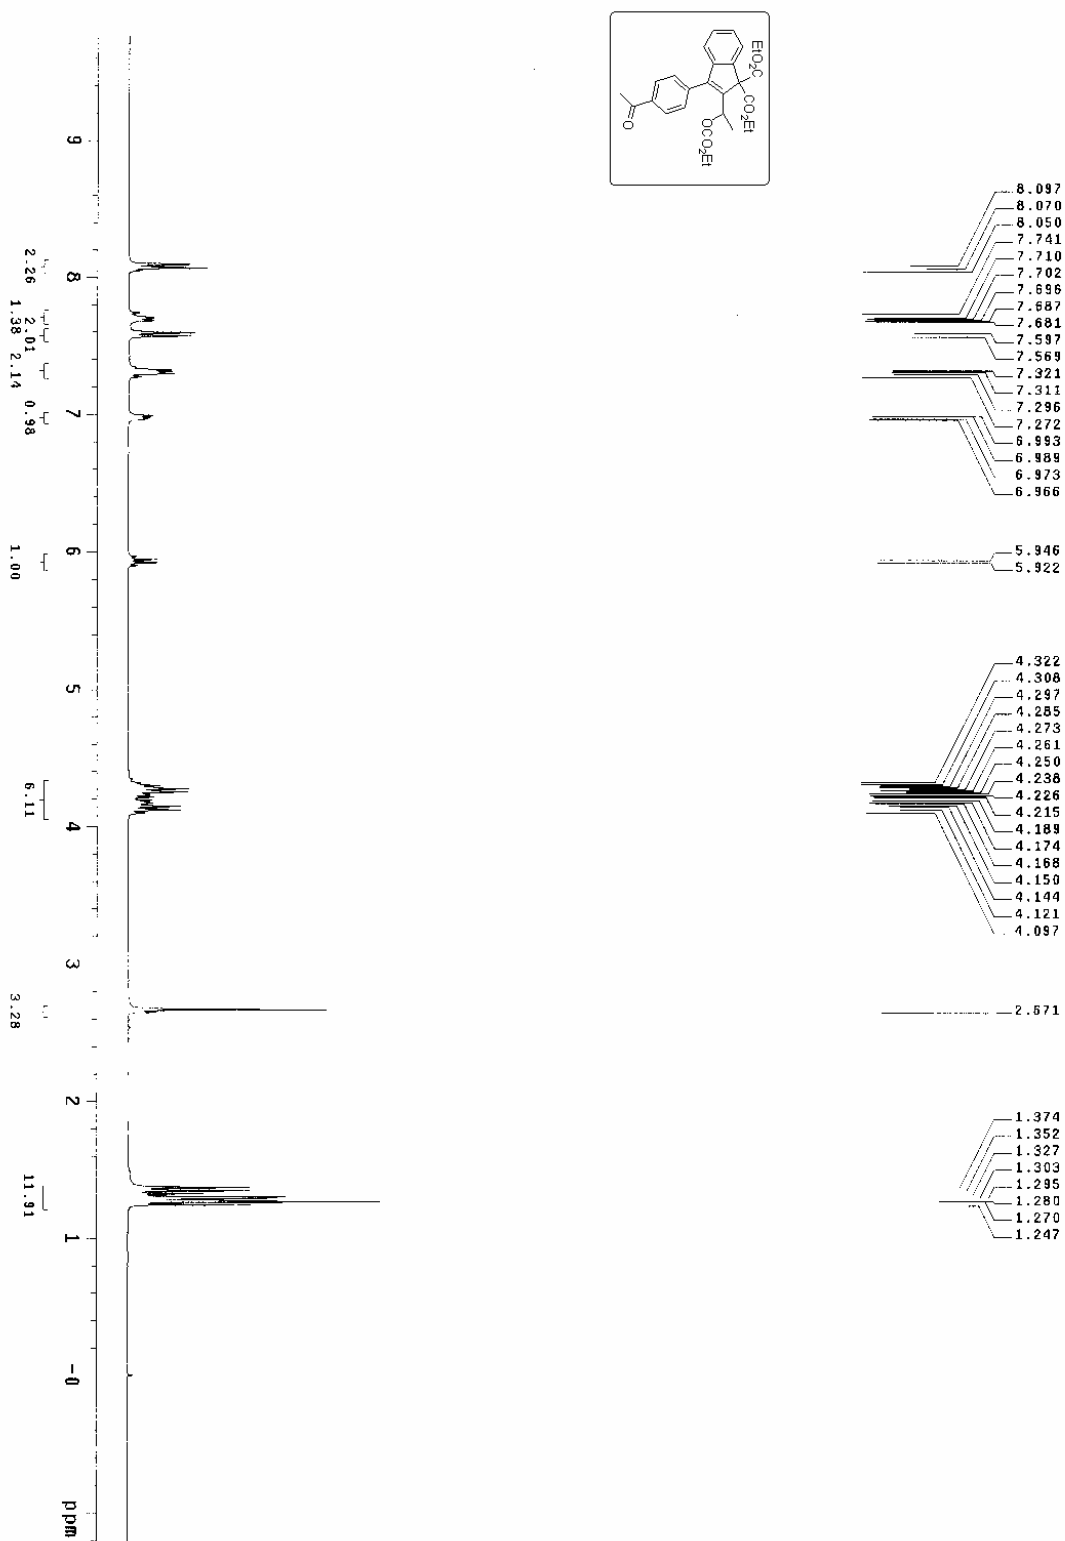

3q

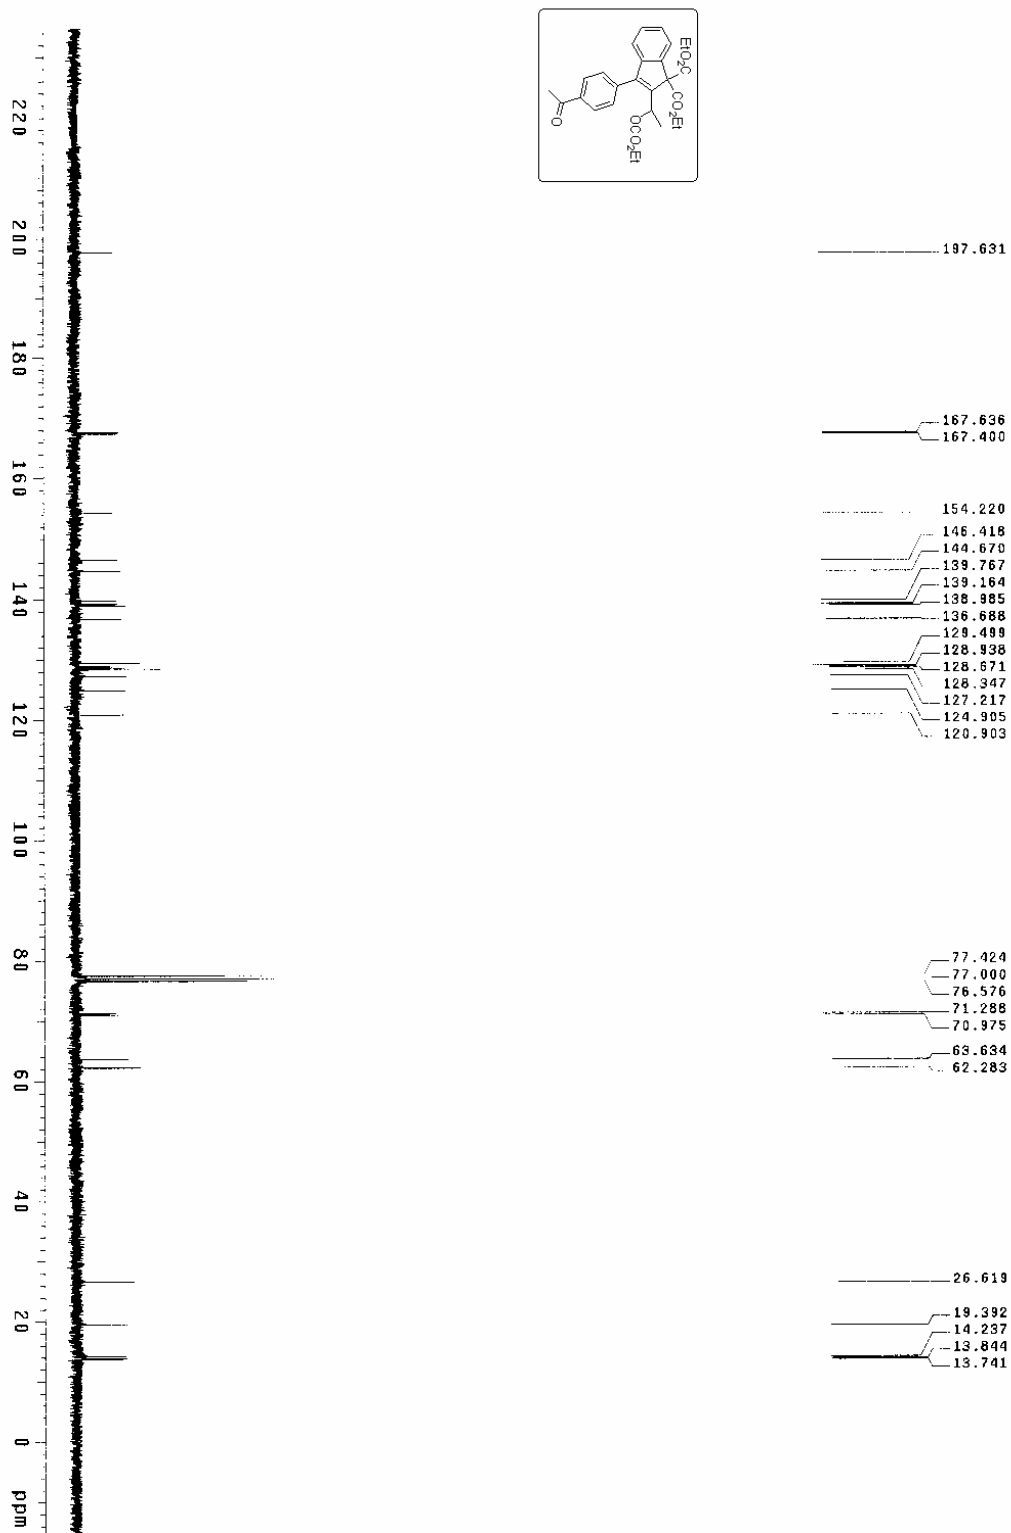

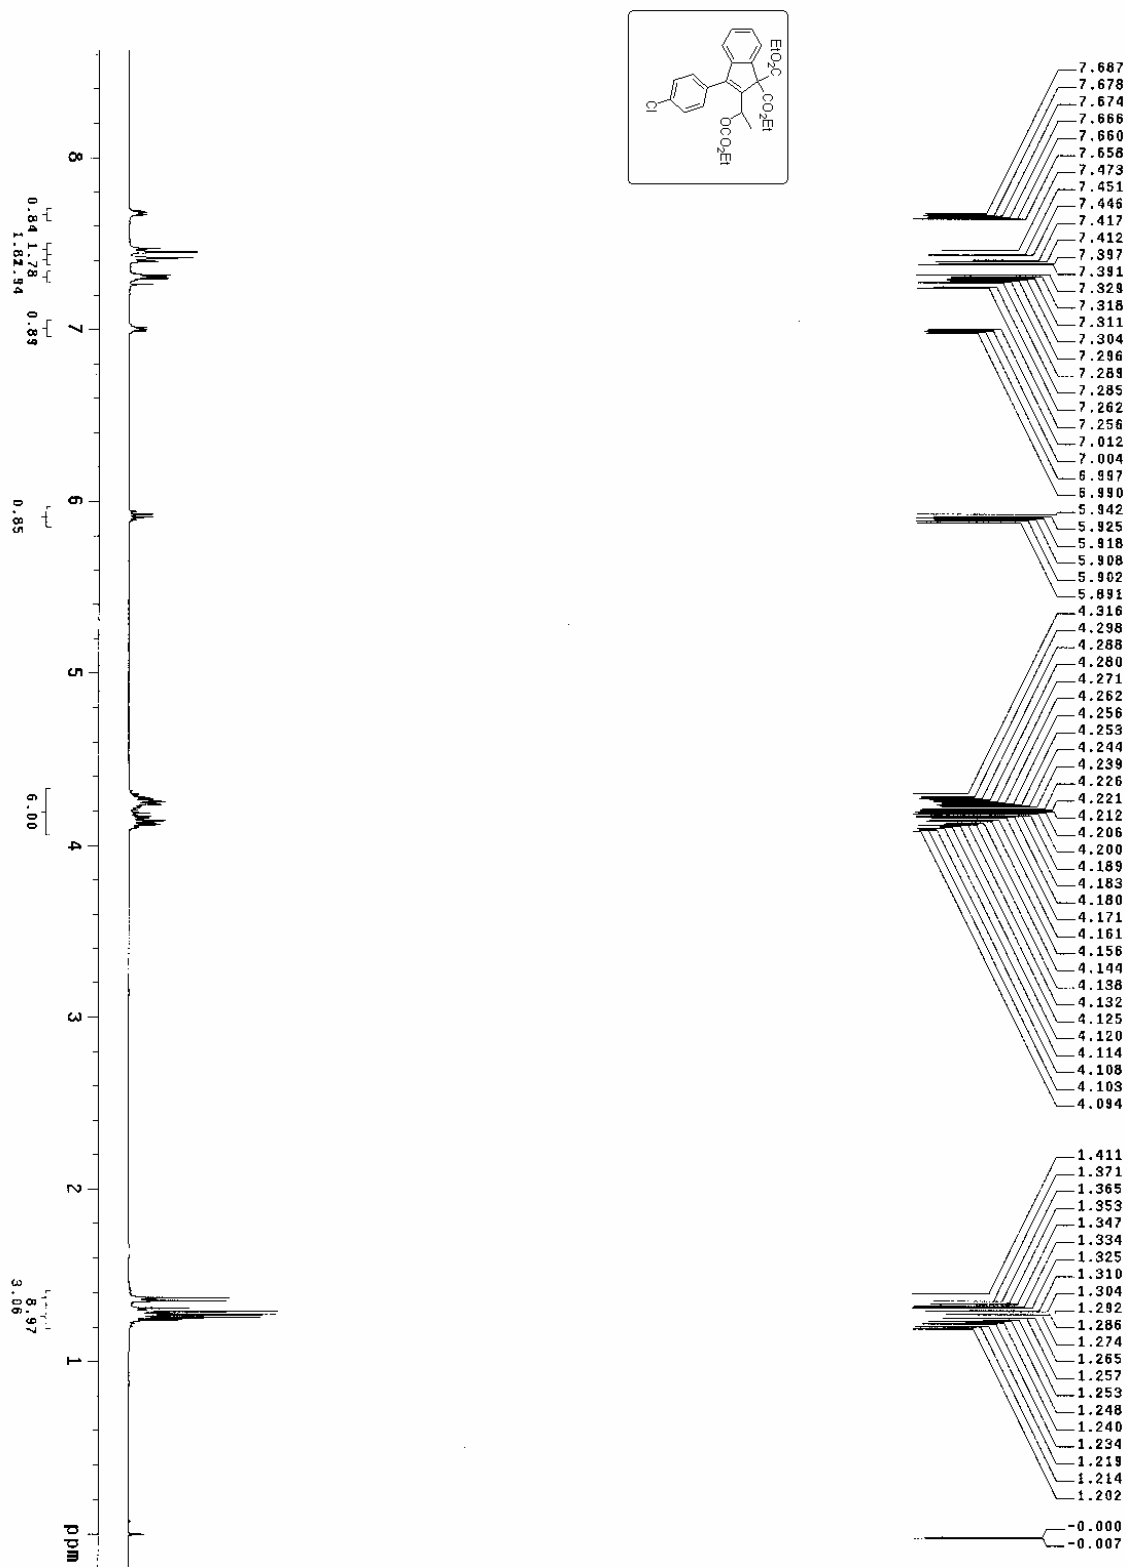

3r

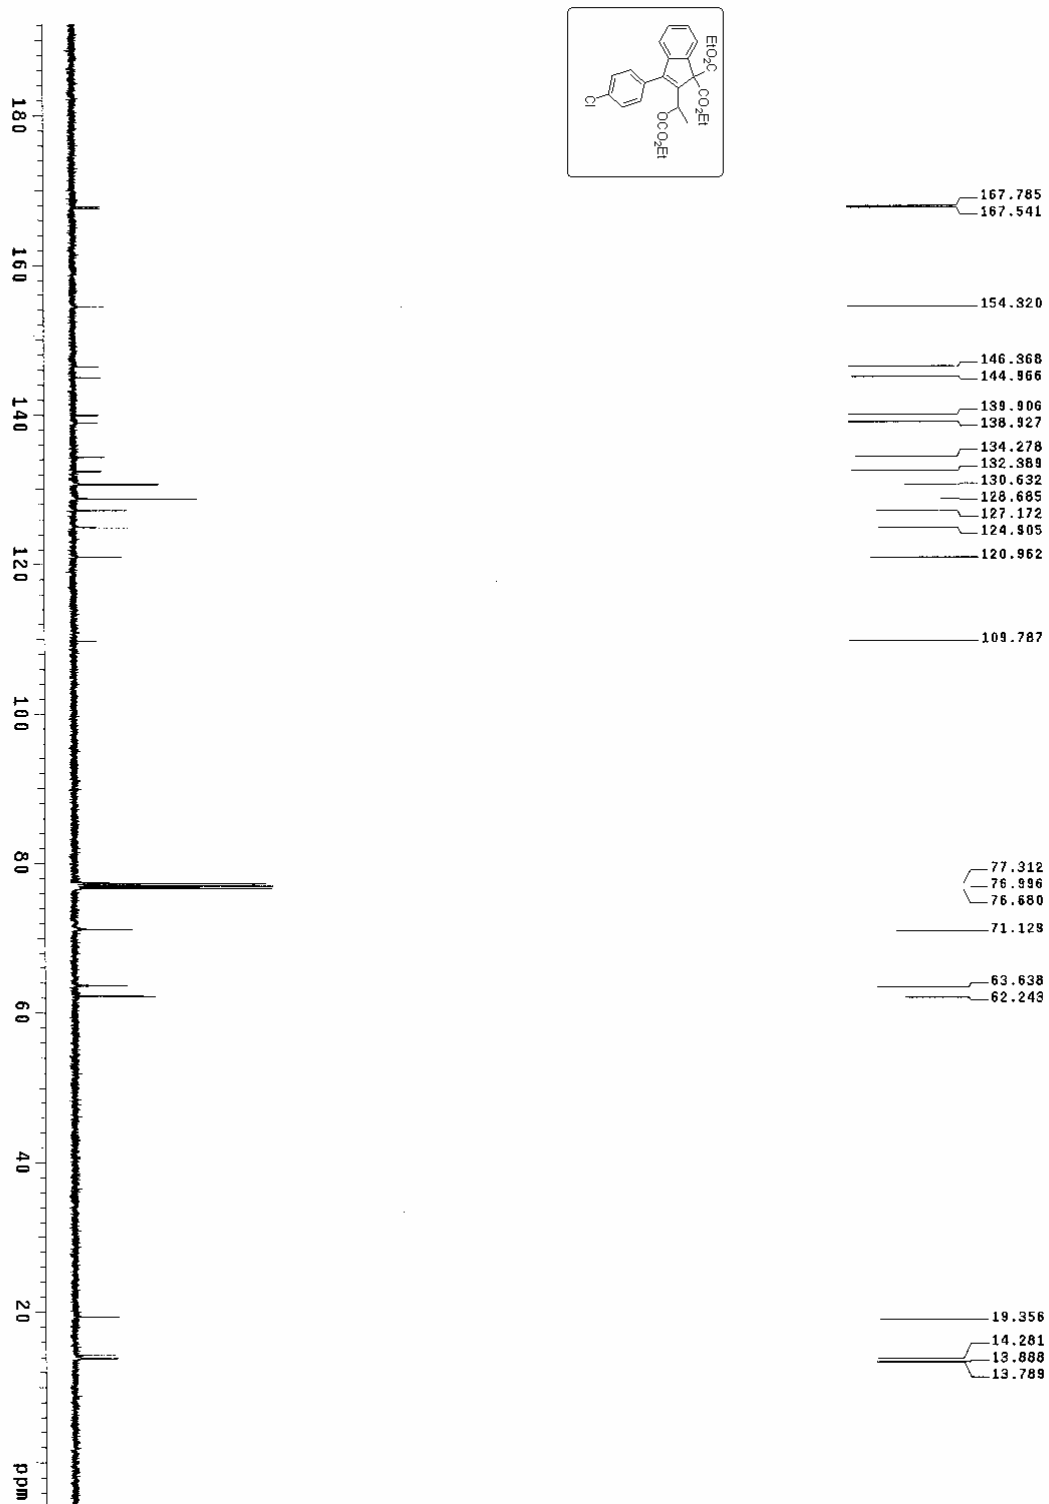

3s

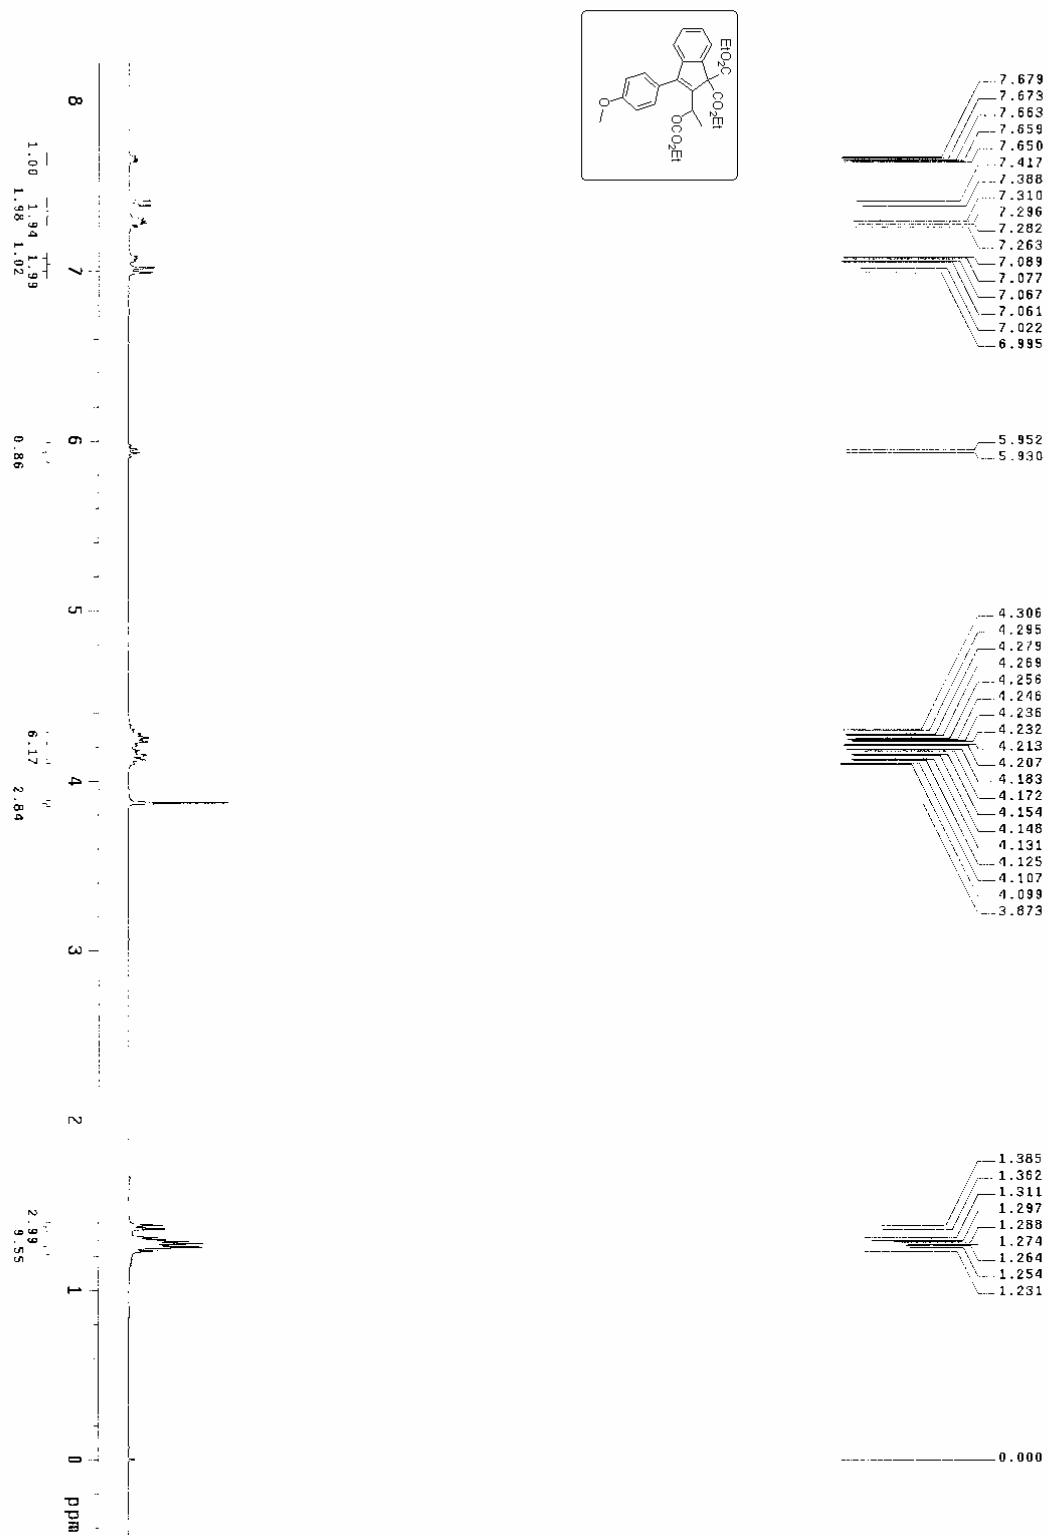

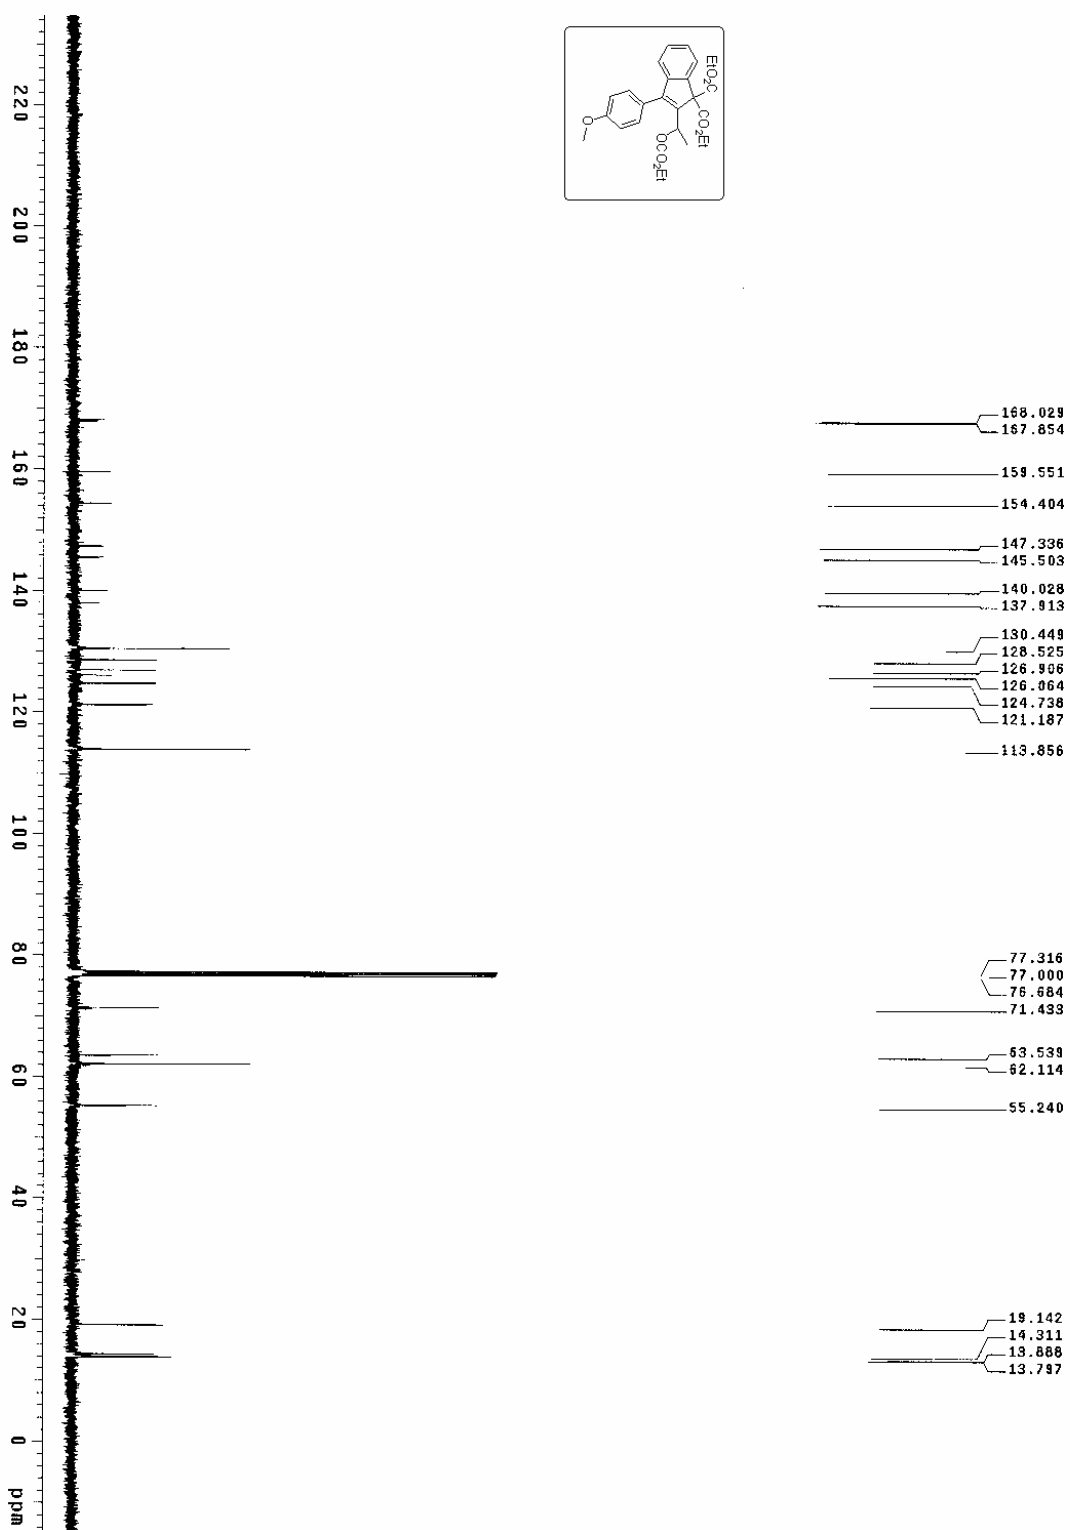



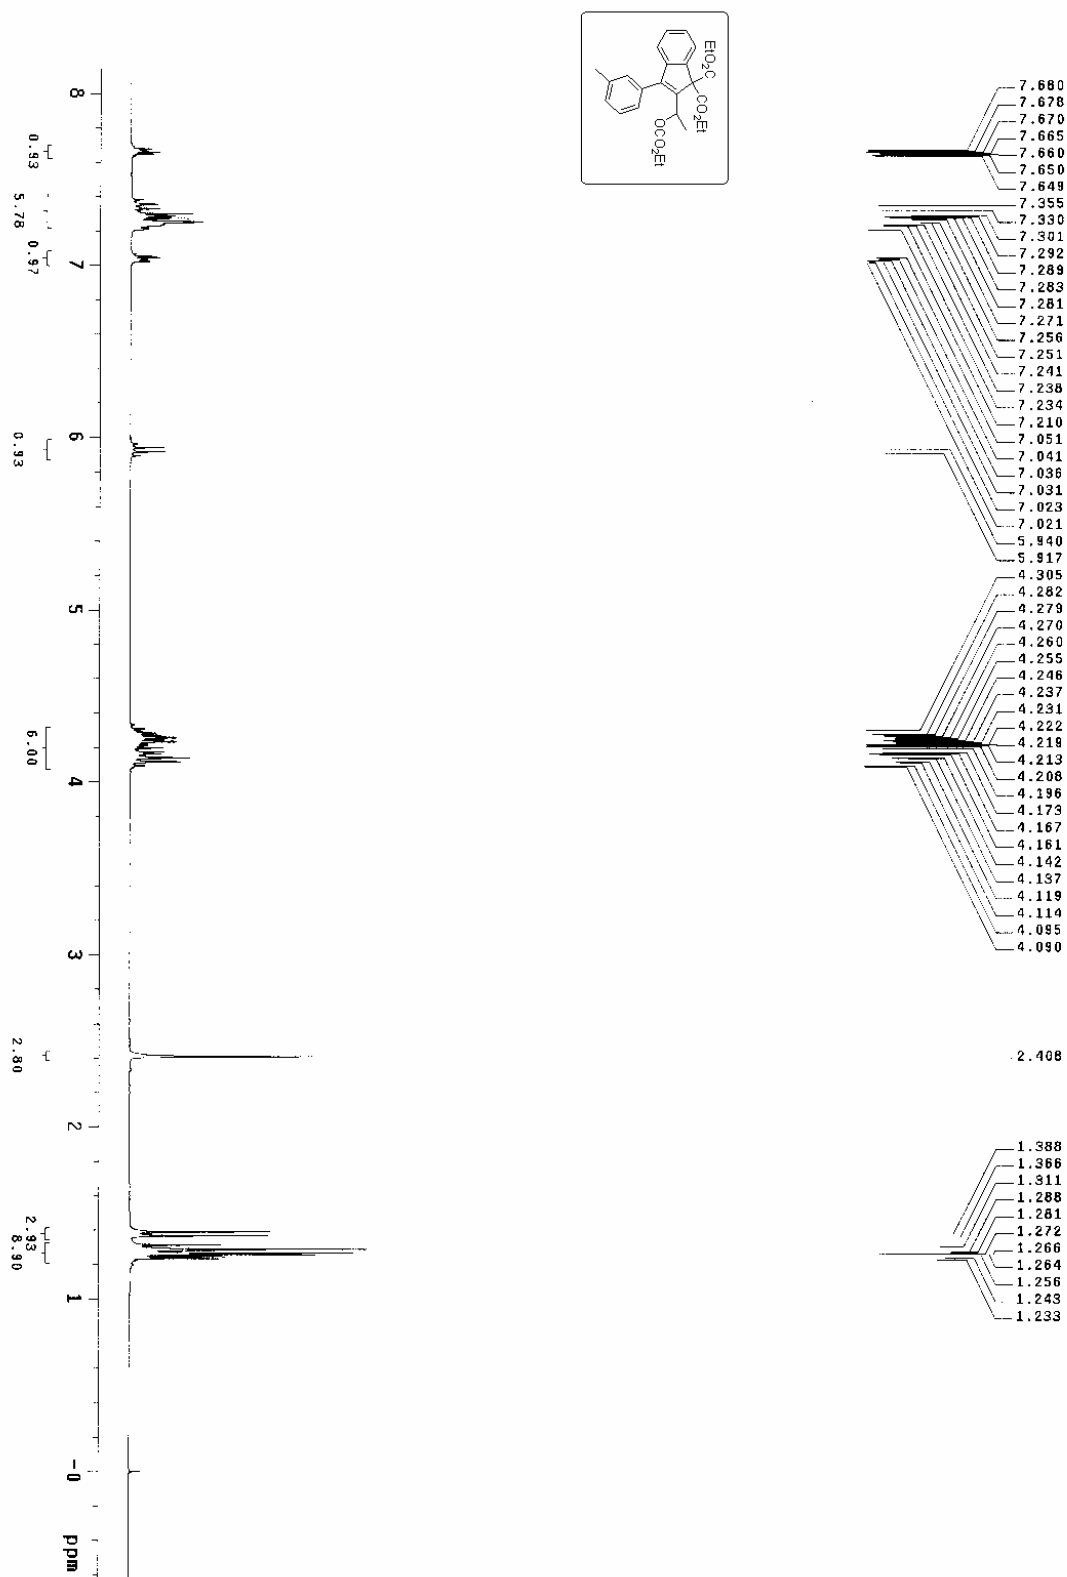

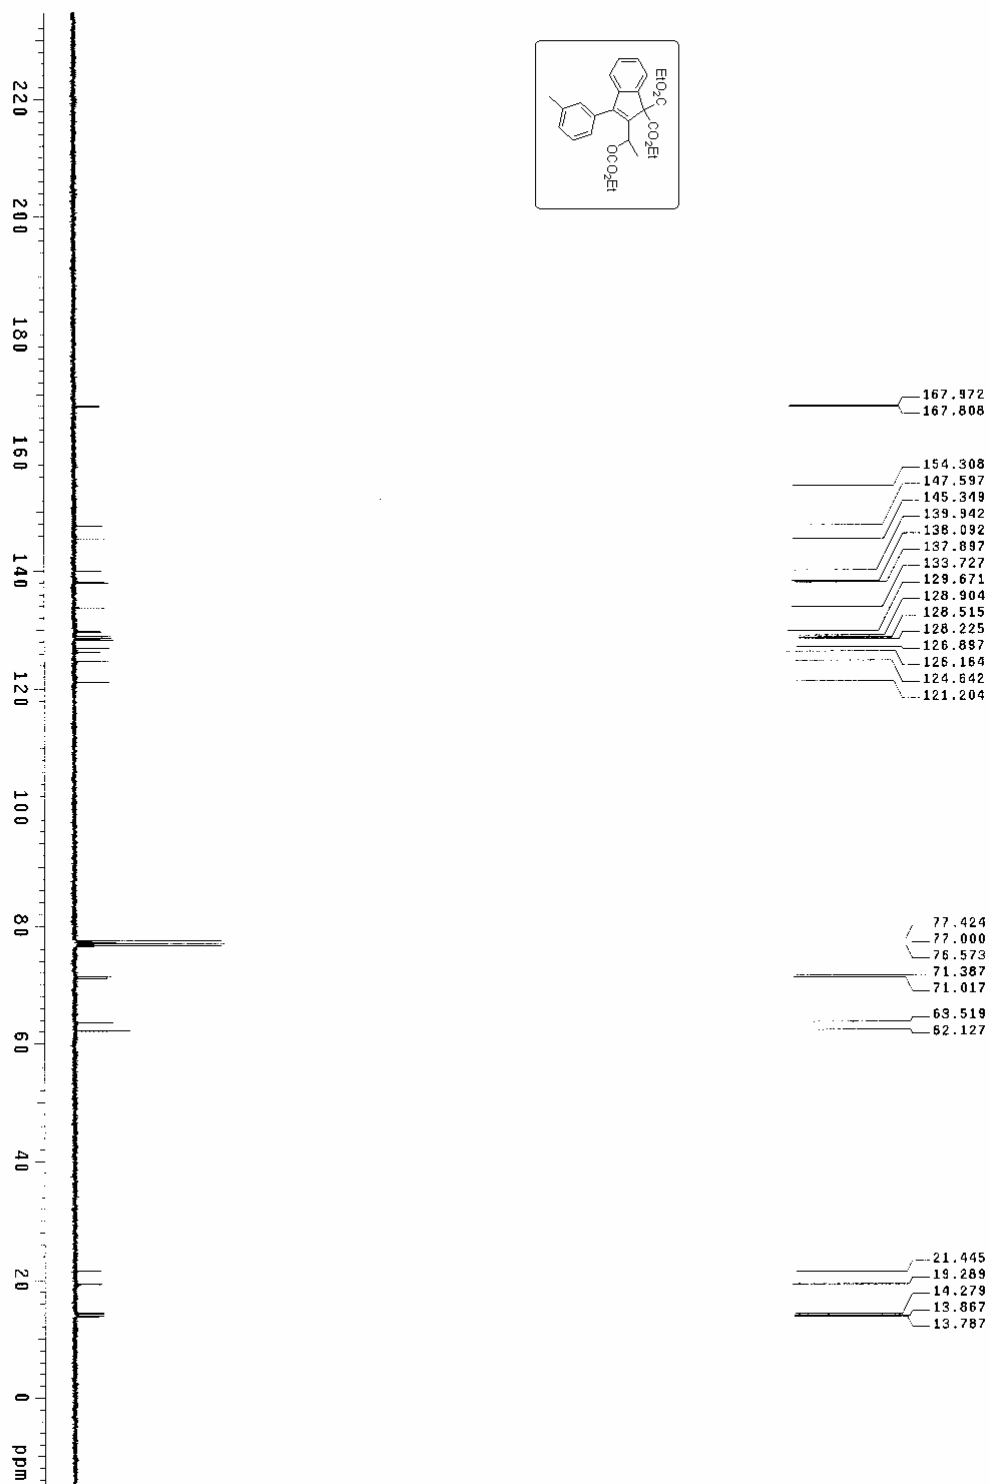

3u

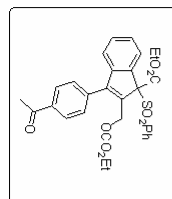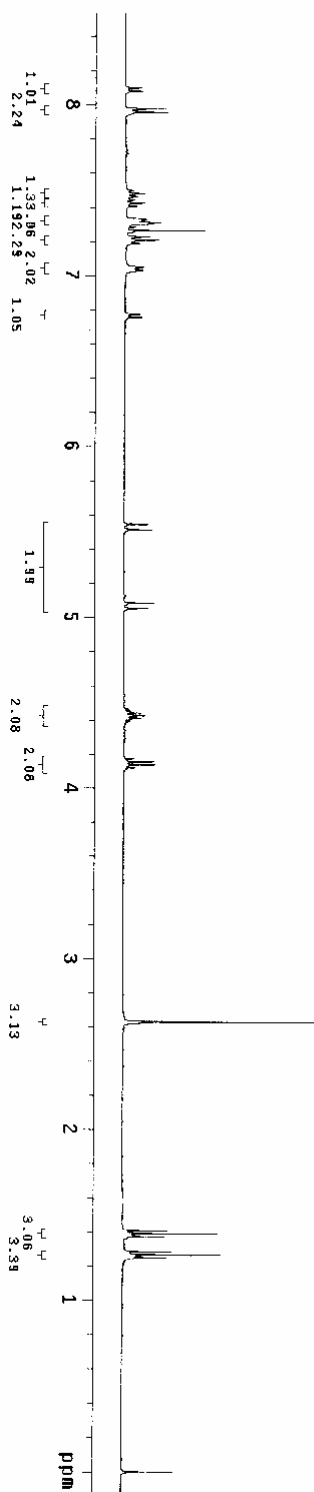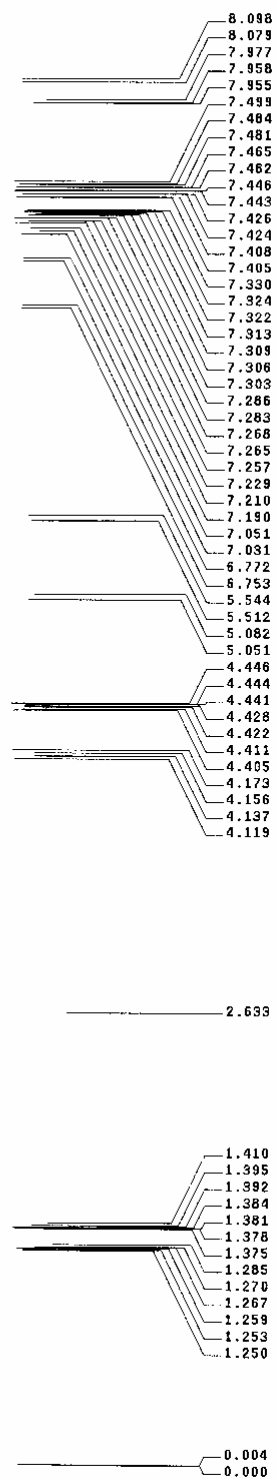

3u

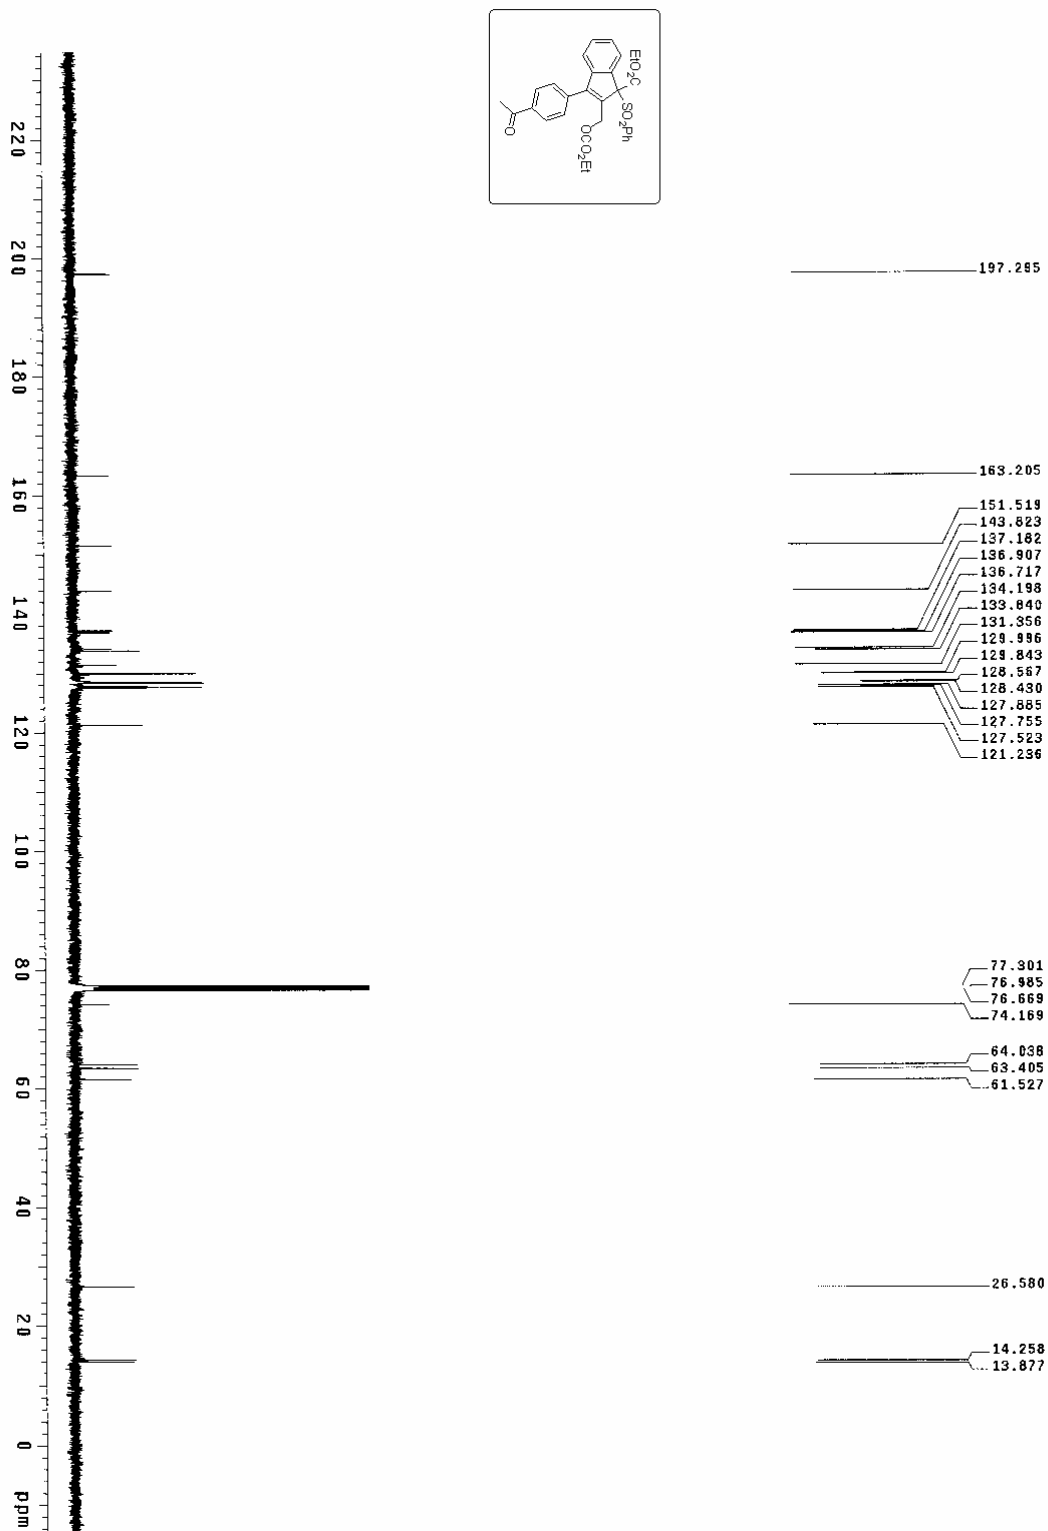

Supplement: b719957k.pdf [file b719957k.pdf]
